# Supplementary material (part 1 of 3)
Source: ML conference proceedings conference paper supplement (https://openreview.net/forum?id=KiDGtYCPcv)

Final: -1.5002

Test II per decision

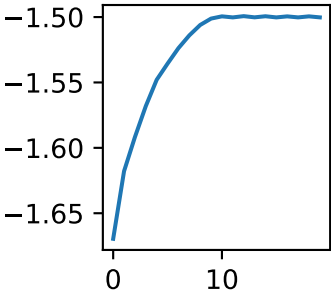

Iteration (outer loop)

Supplement: supplementary_material [file attachment]

Final: -1.0905

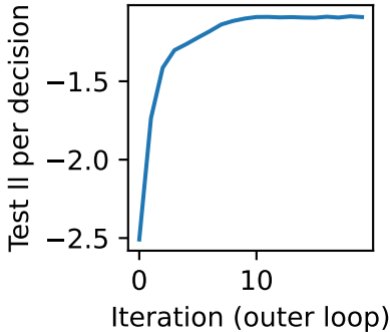

Supplement: supplementary_material [file attachment]

Final ll: -128.11

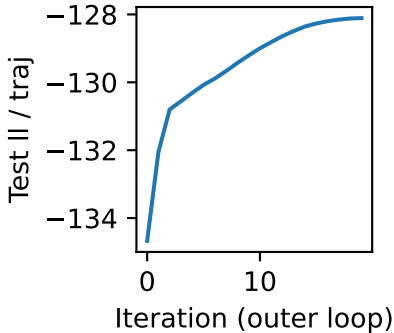

Supplement: supplementary_material [file attachment]

Loss for weight

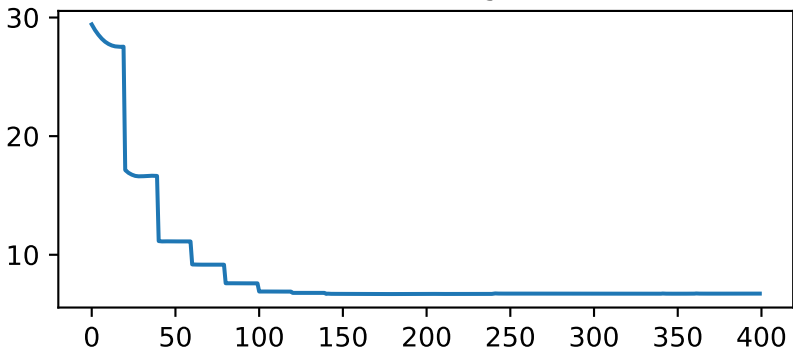

Loss for maps

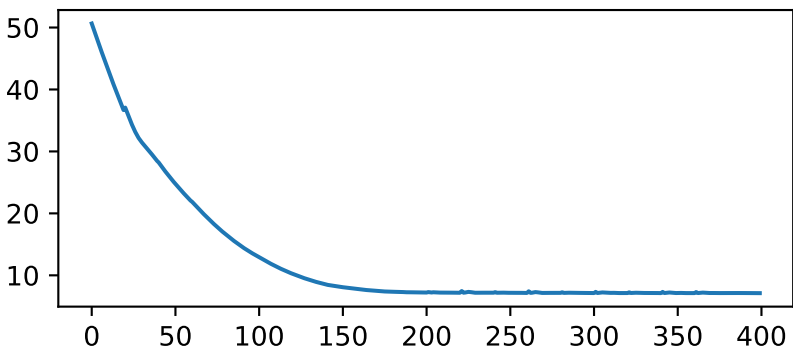

Supplement: supplementary_material [file attachment]

Loss for weight

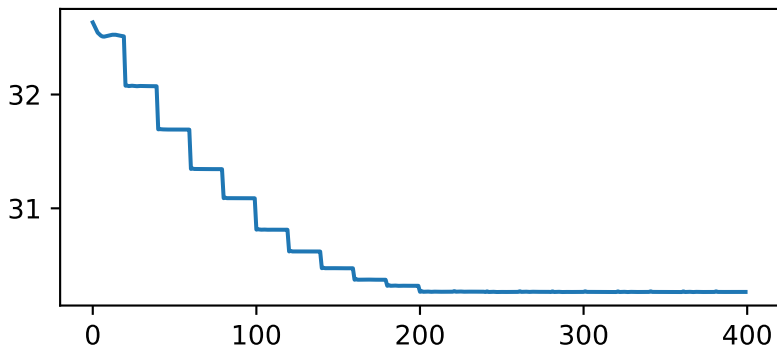

Loss for maps

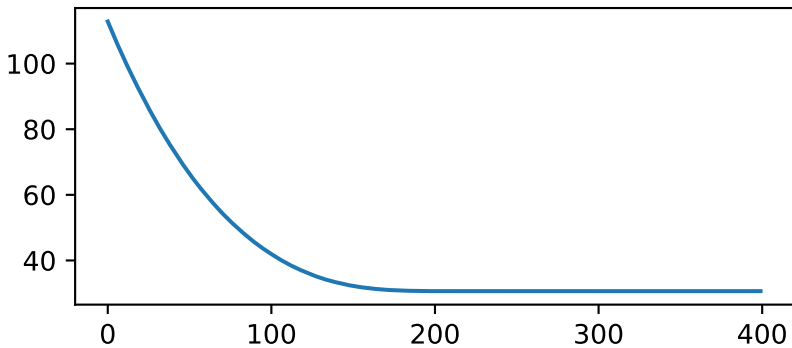

Supplement: supplementary_material [file attachment]

Loss for weight

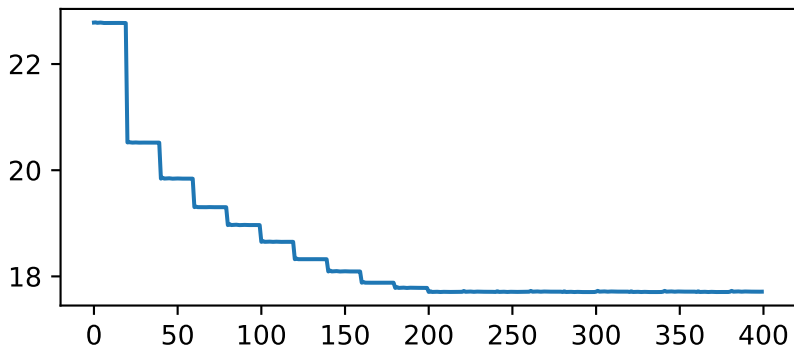

Loss for maps

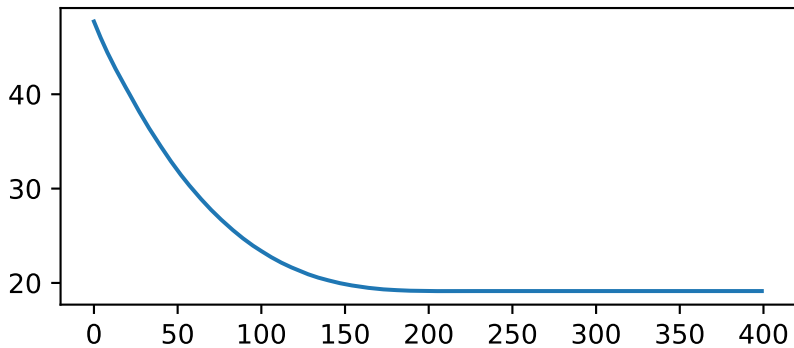

Supplement: supplementary_material [file attachment]

Loss for weight

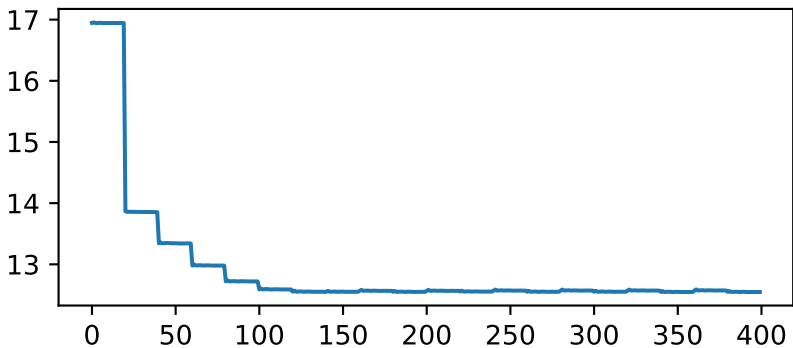

Loss for maps

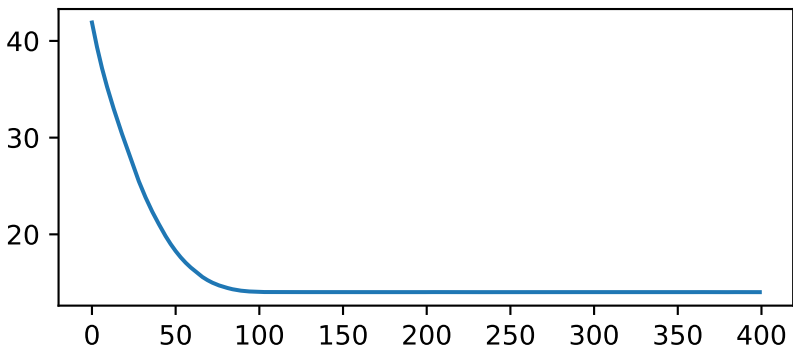

Supplement: supplementary_material [file attachment]

Loss for weight

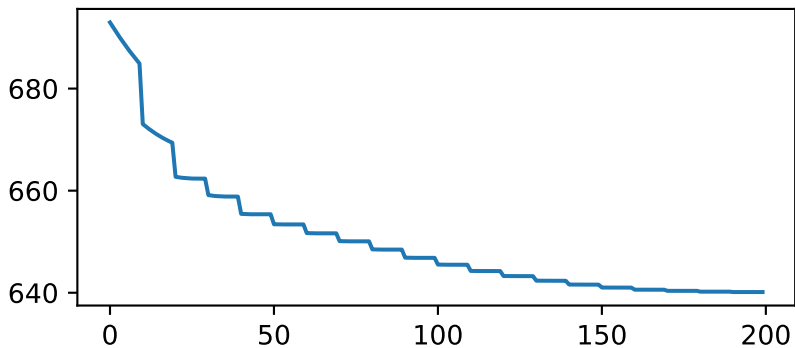

Loss for maps

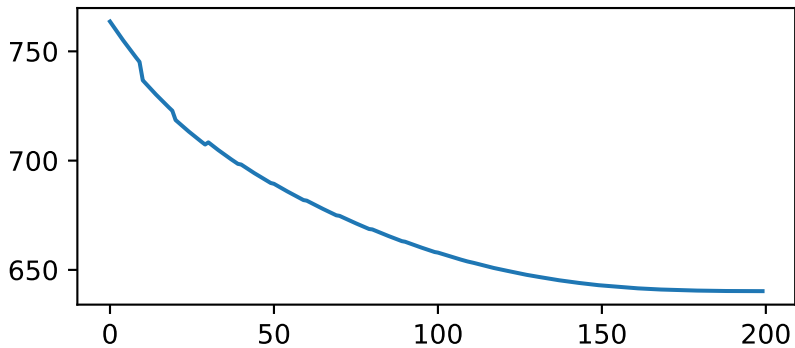

Supplement: supplementary_material [file attachment]

Loss for weight

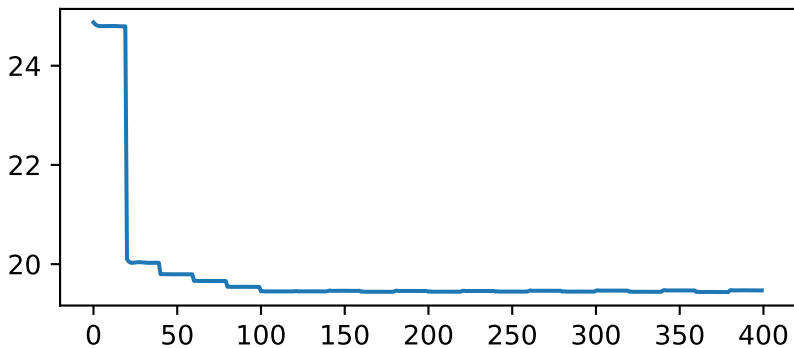

Loss for maps

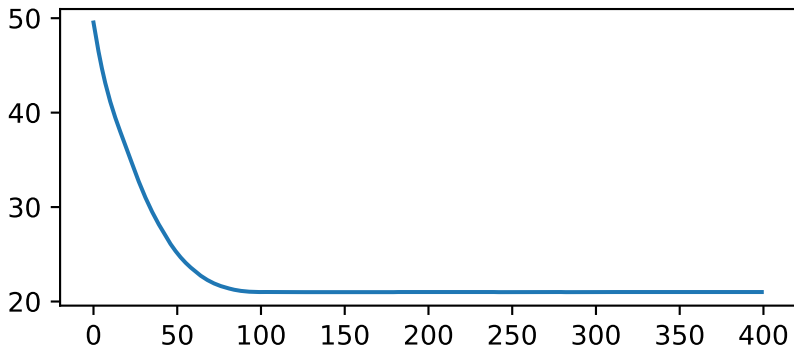

Supplement: supplementary_material [file attachment]

Final: -0.9588

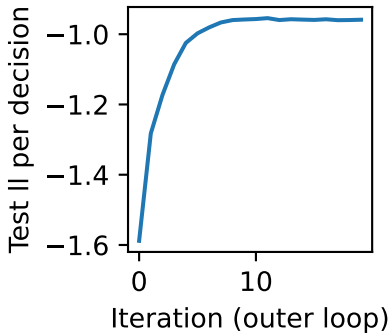

Supplement: supplementary_material [file attachment]

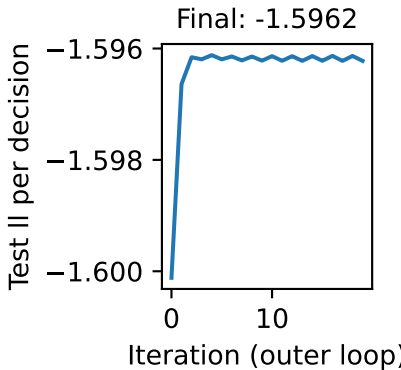

Supplement: supplementary_material [file attachment]

Final: -1.5738

Test II per decision

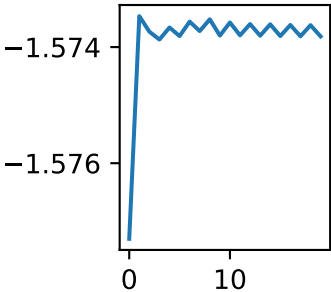

Iteration (outer loop)

Supplement: supplementary_material [file attachment]

Final: -3.1508

Test II per decision

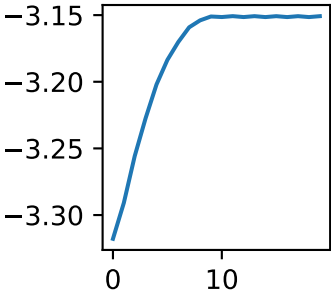

Iteration (outer loop)

Supplement: supplementary_material [file attachment]

Loss for weight

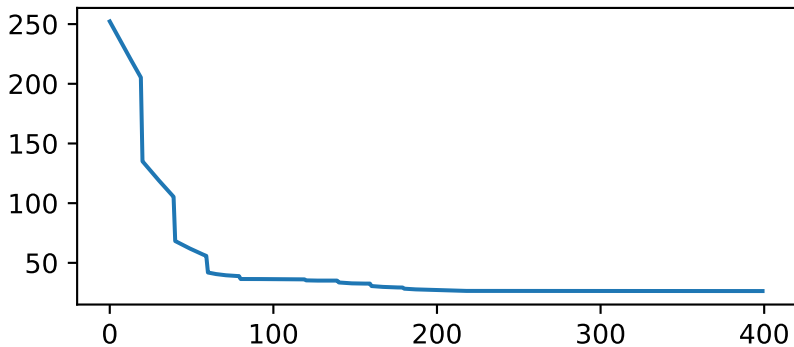

Loss for maps

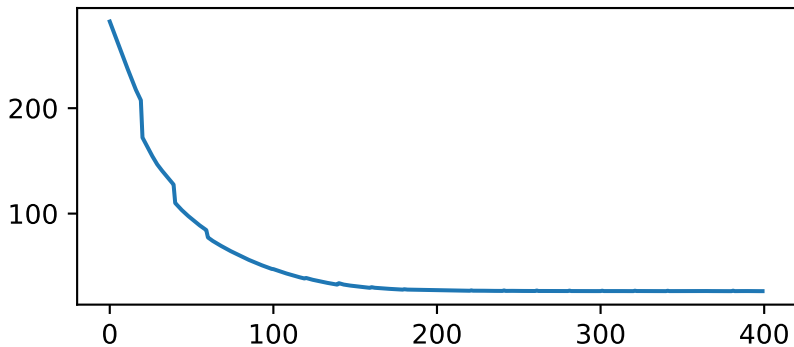

Supplement: supplementary_material [file attachment]

Loss for weight

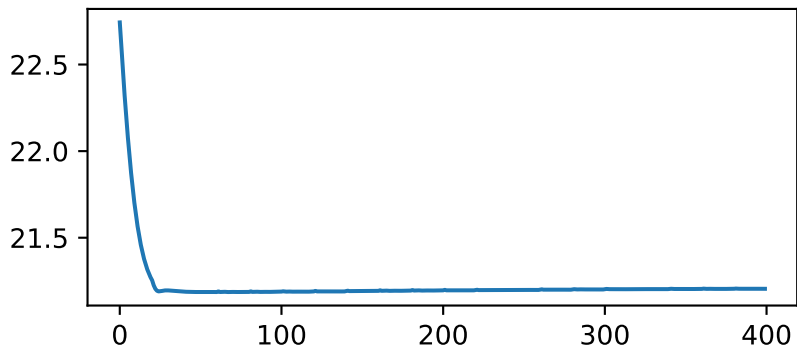

Loss for maps

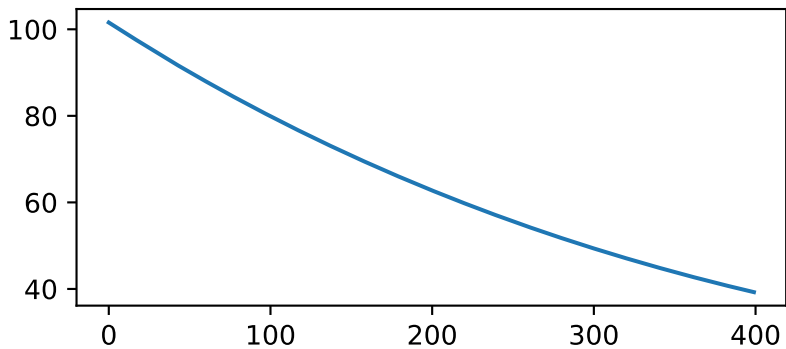

Supplement: supplementary_material [file attachment]

Loss for weight

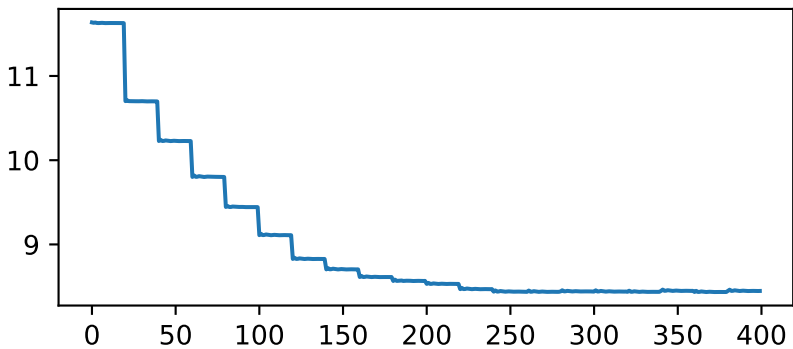

Loss for maps

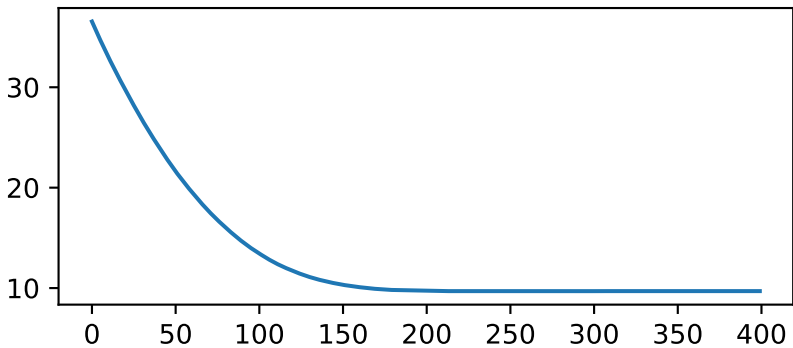

Supplement: supplementary_material [file attachment]

Final: -3.1692

Test II per decision

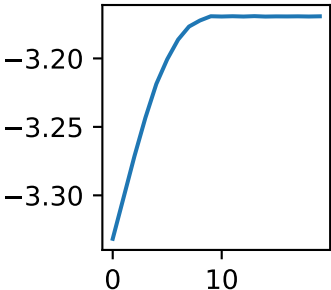

Iteration (outer loop)

Supplement: supplementary_material [file attachment]

Loss for weight

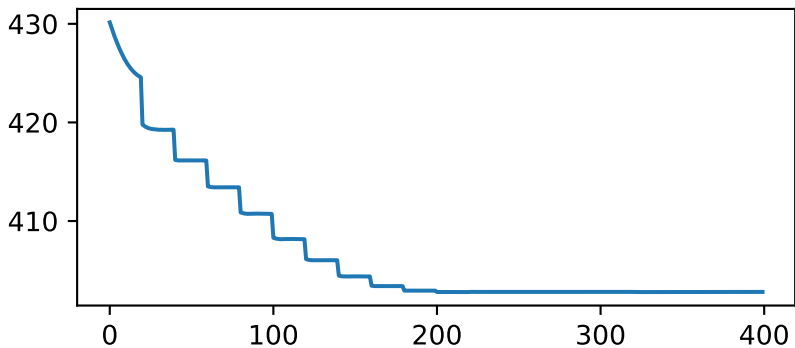

Loss for maps

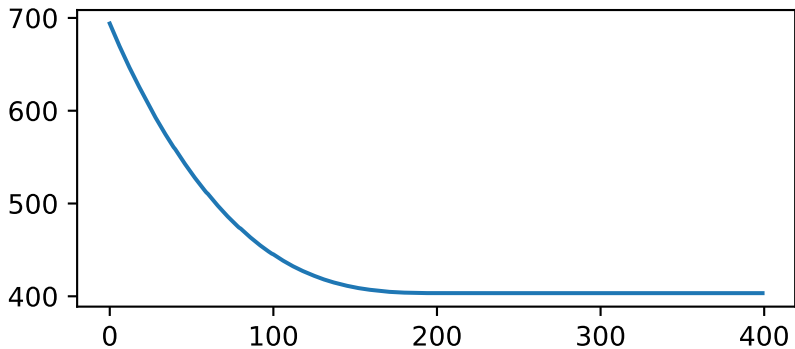

Supplement: supplementary_material [file attachment]

Loss for weight

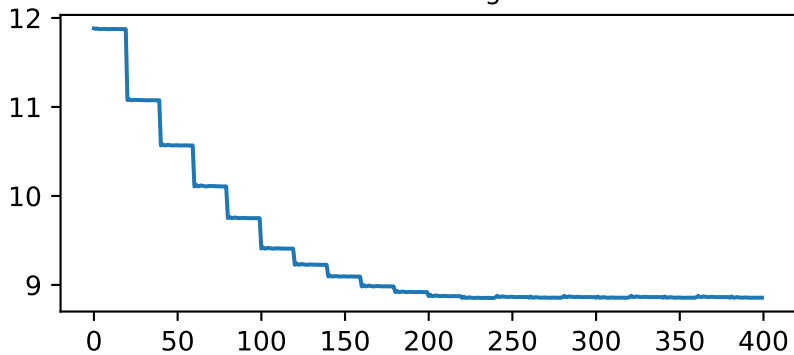

Loss for maps

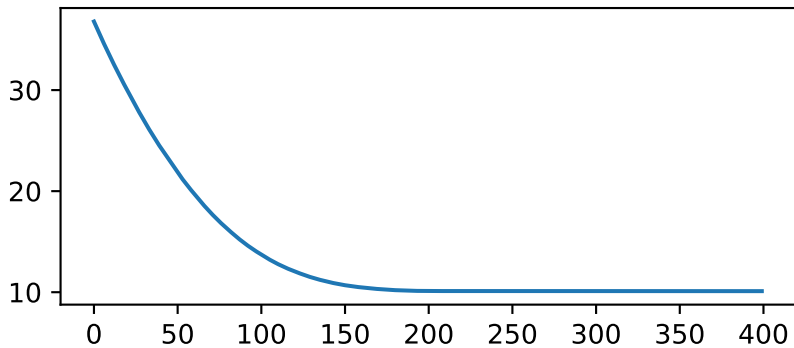

Supplement: supplementary_material [file attachment]

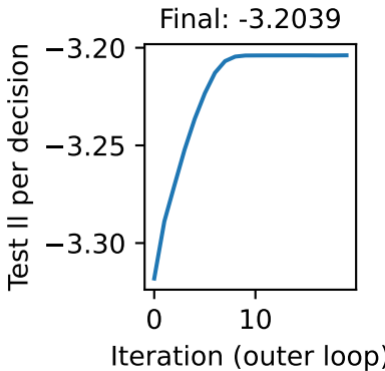

Supplement: supplementary_material [file attachment]

Loss for weight

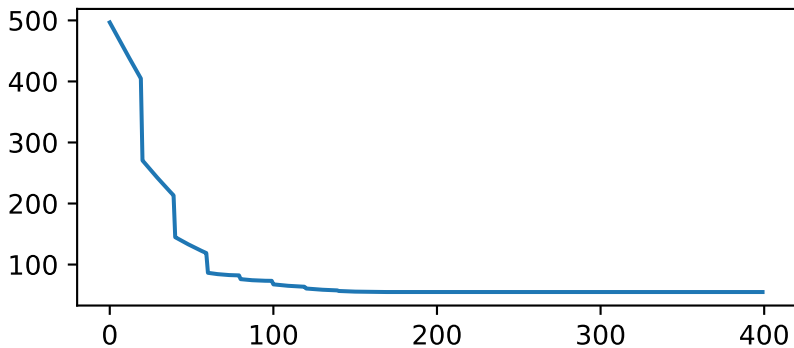

Loss for maps

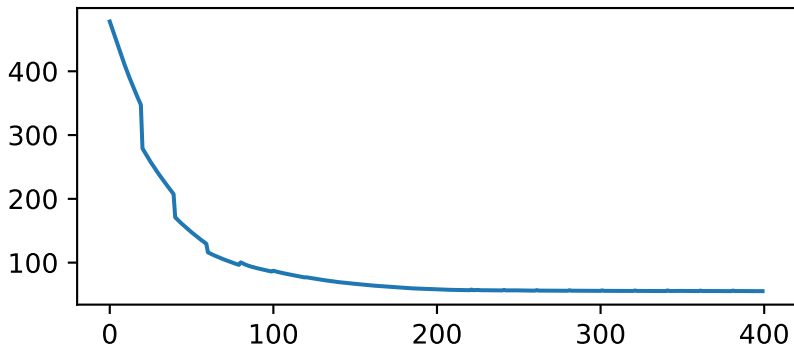

Supplement: supplementary_material [file attachment]

Loss for weight

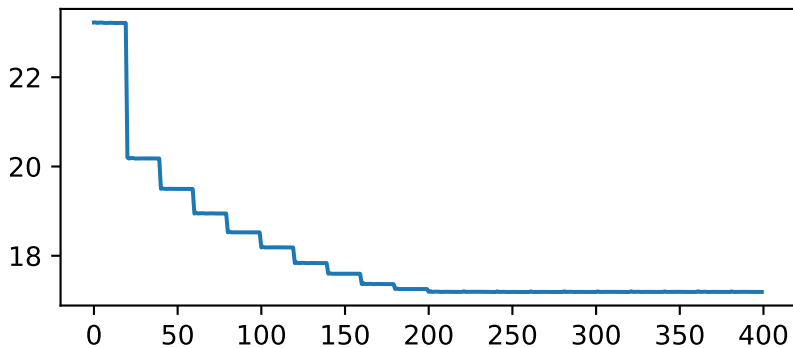

Loss for maps

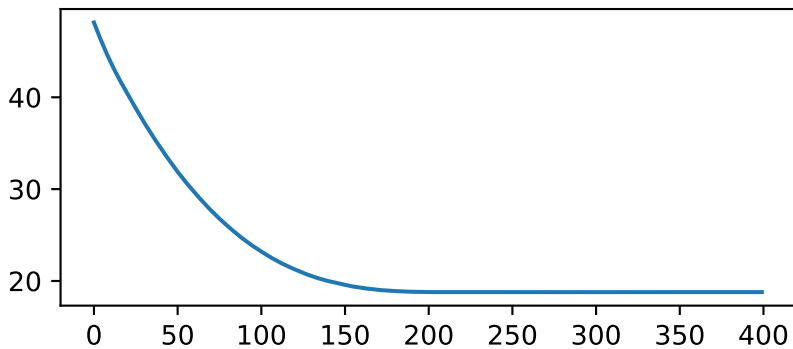

Supplement: supplementary_material [file attachment]

Loss for weight

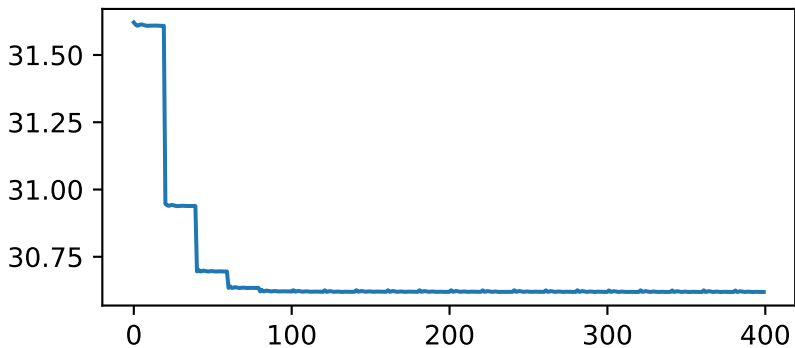

Loss for maps

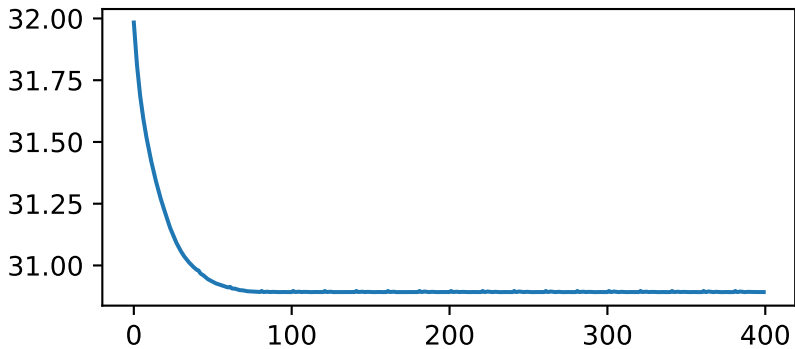

Supplement: supplementary_material [file attachment]

Loss for weight

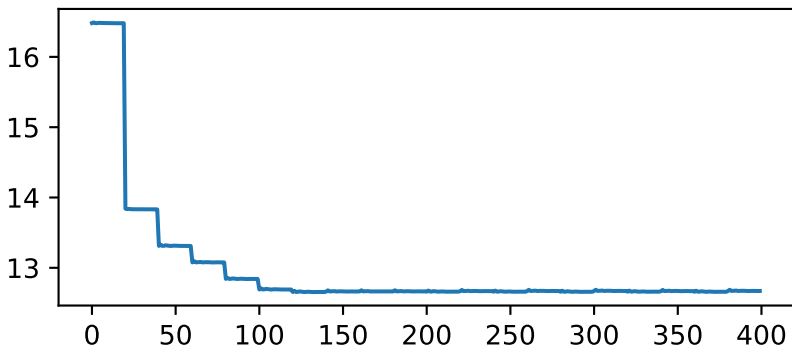

Loss for maps

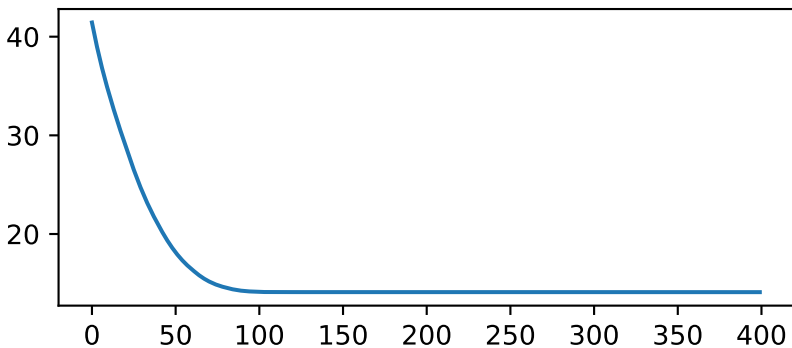

Supplement: supplementary_material [file attachment]

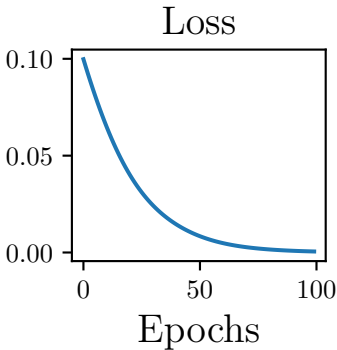

Supplement: supplementary_material [file attachment]

Final ll: -0.01

Test ll per decision

-0.00720

-0.00725

0

10

Iteration (outer loop)

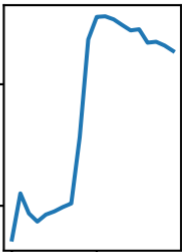

Supplement: supplementary_material [file attachment]

Final: -2.9716

Test II per decision

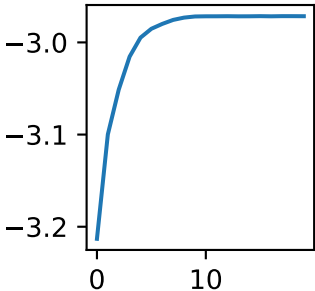

Iteration (outer loop)

Supplement: supplementary_material [file attachment]

Loss for weight

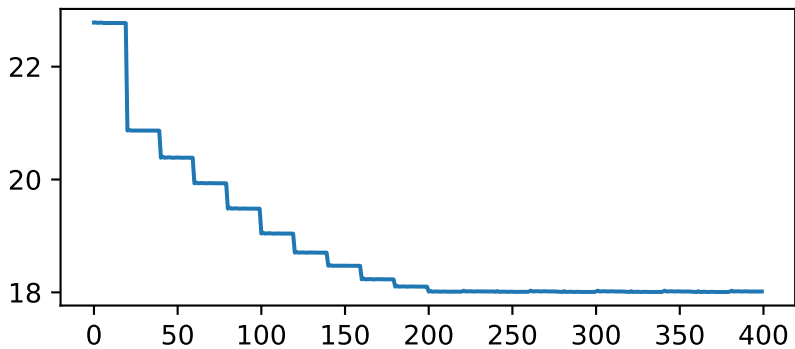

Loss for maps

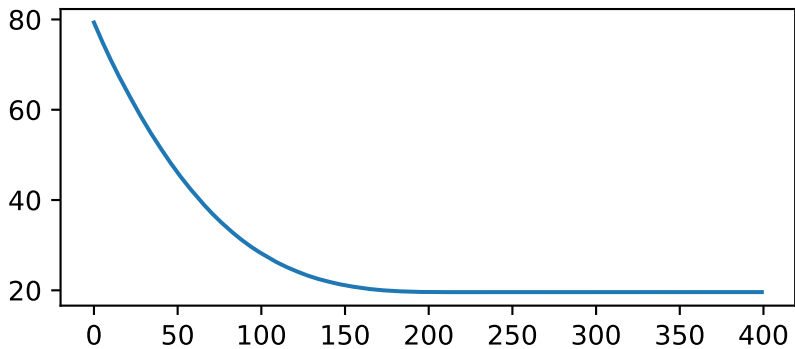

Supplement: supplementary_material [file attachment]

Final: -3.1323

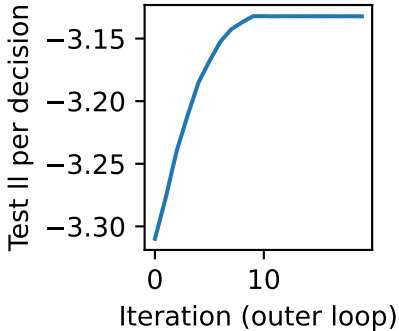

Supplement: supplementary_material [file attachment]

Final: -1.5702

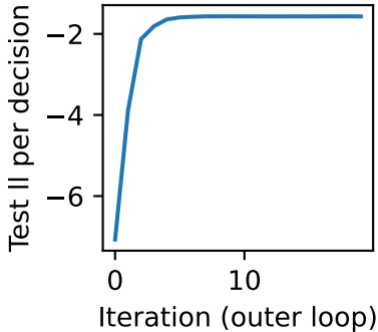

Supplement: supplementary_material [file attachment]

Loss for weight

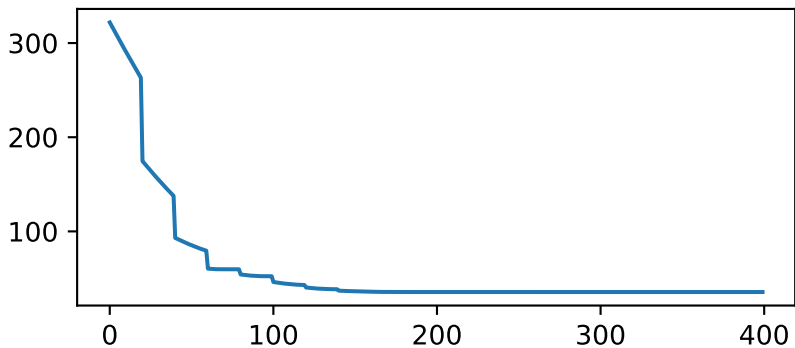

Loss for maps

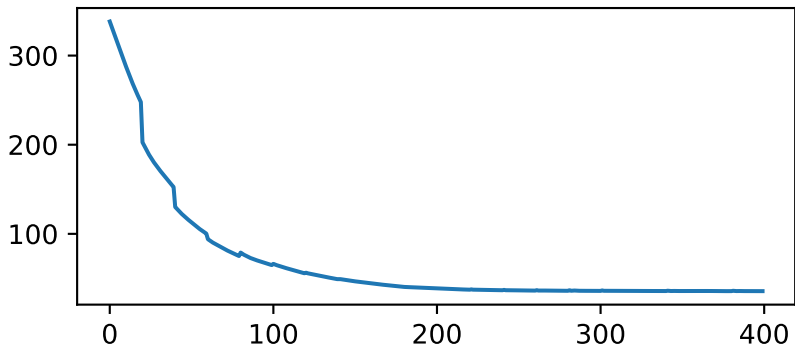

Supplement: supplementary_material [file attachment]

Loss for weight

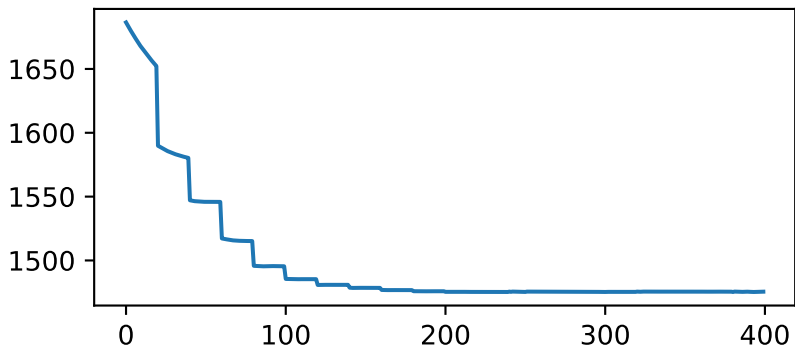

Loss for maps

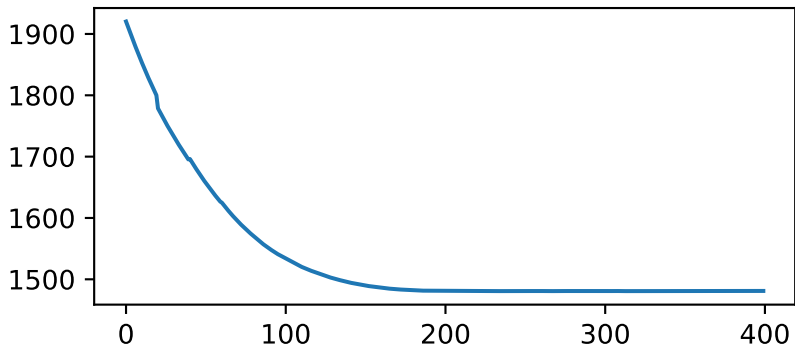

Supplement: supplementary_material [file attachment]

Loss for weight

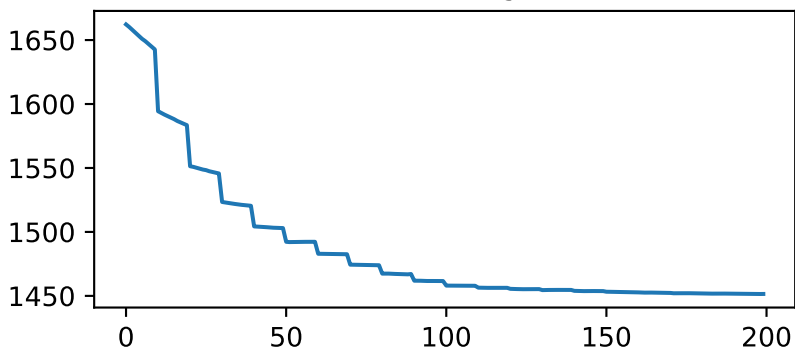

Loss for maps

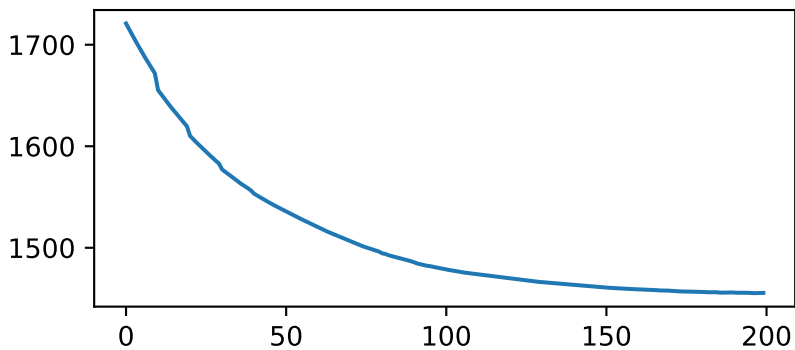

Supplement: supplementary_material [file attachment]

Loss for weight

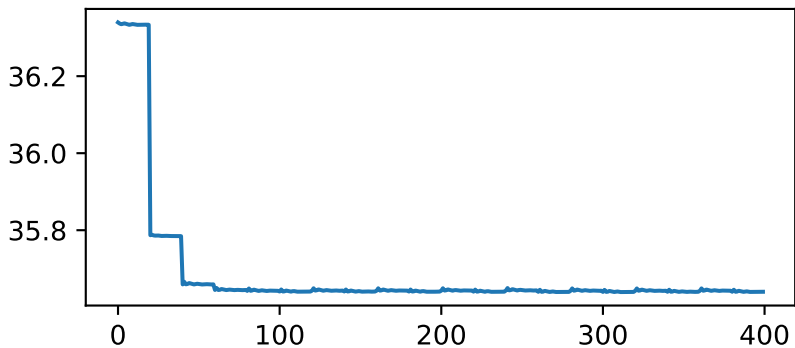

Loss for maps

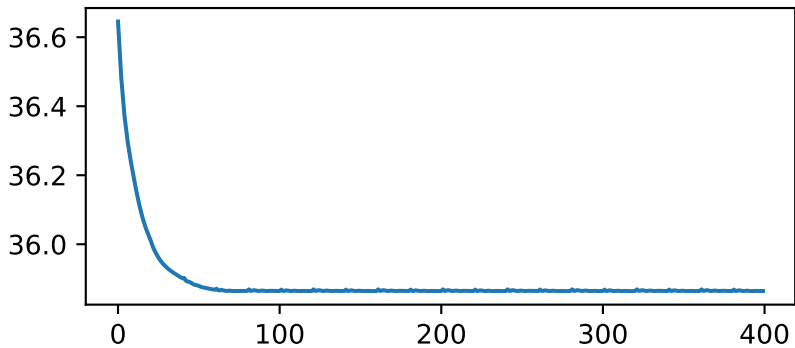

Supplement: supplementary_material [file attachment]

Loss for weight

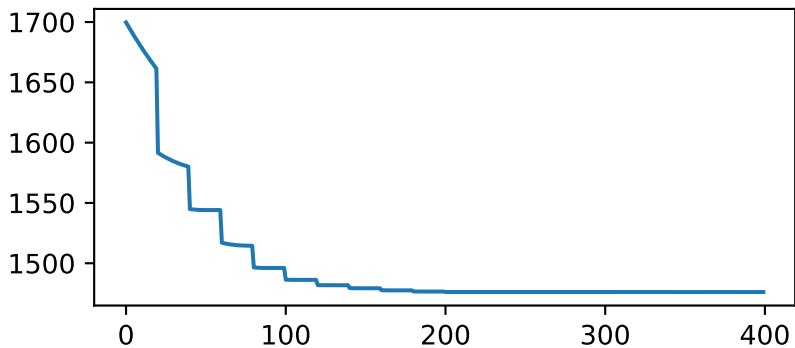

Loss for maps

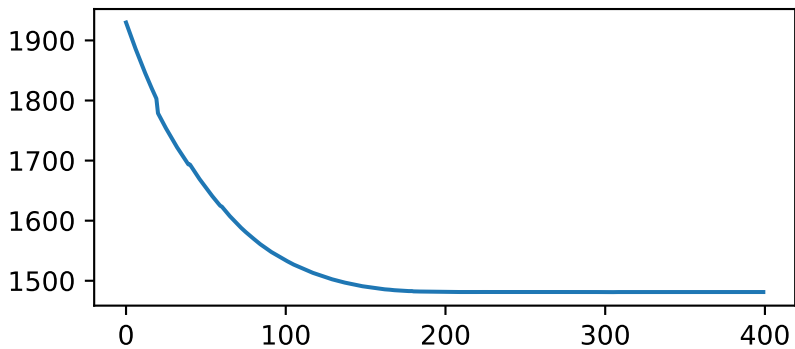

Supplement: supplementary_material [file attachment]

Loss for weight

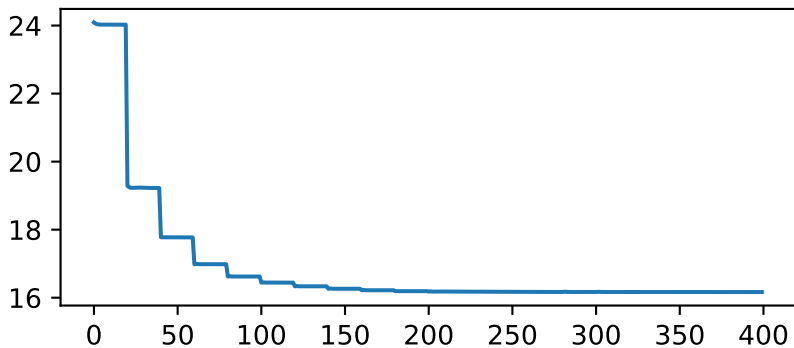

Loss for maps

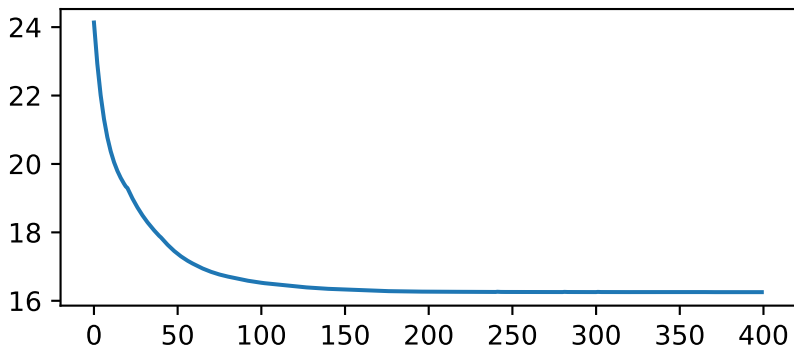

Supplement: supplementary_material [file attachment]

Final II: -0.58

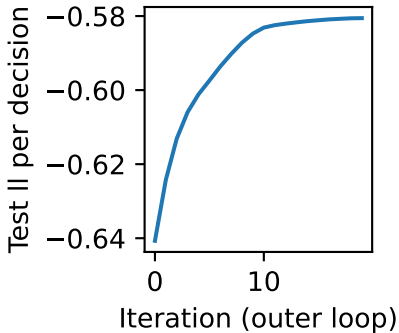

Supplement: supplementary_material [file attachment]

Final: -1.9955

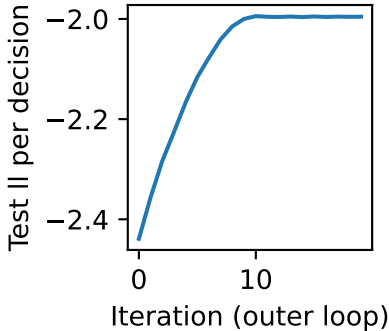

Supplement: supplementary_material [file attachment]

Loss for weight

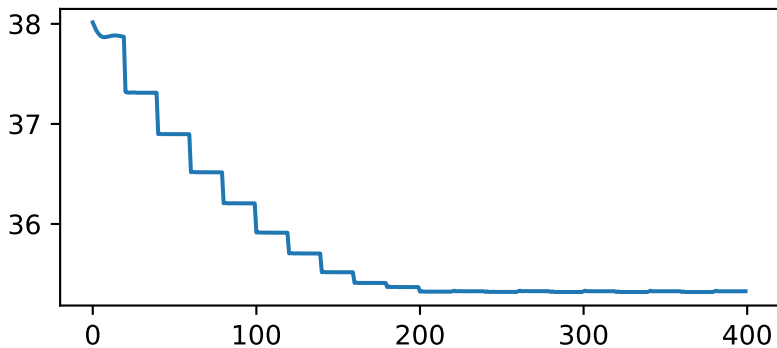

Loss for maps

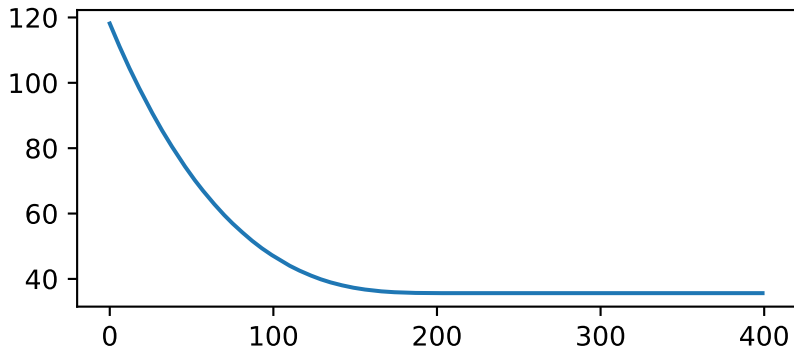

Supplement: supplementary_material [file attachment]

Final: -0.8565

Test II per decision

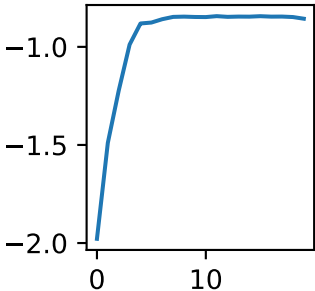

Iteration (outer loop)

Supplement: supplementary_material [file attachment]

Final: -1.5894

Test II per decision

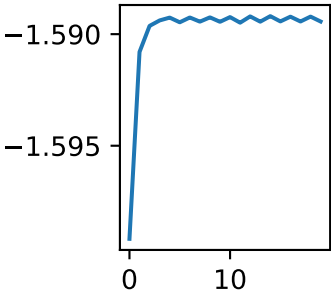

Iteration (outer loop)

Supplement: supplementary_material [file attachment]

Final: -1.0506

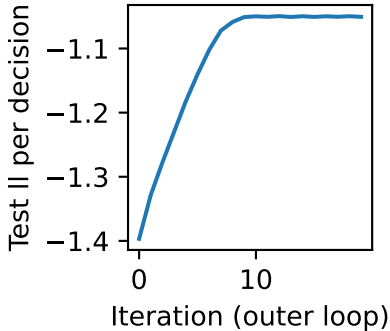

Supplement: supplementary_material [file attachment]

Final: -1.3017

Test II per decision

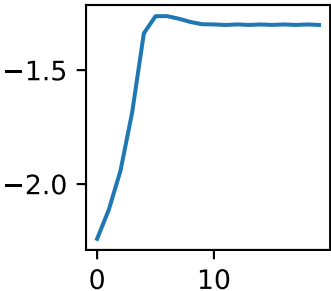

Iteration (outer loop)

Supplement: supplementary_material [file attachment]

Loss for weight

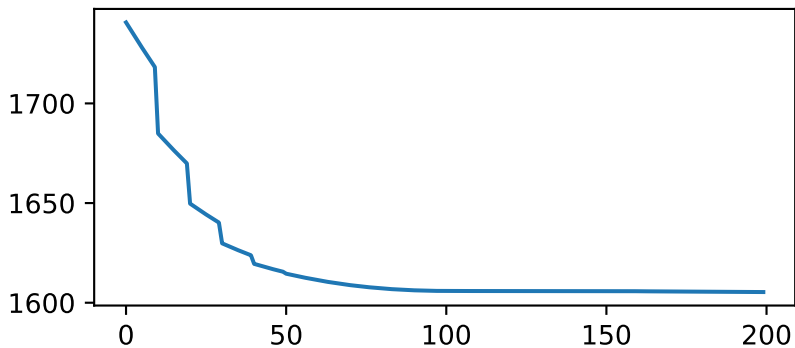

Loss for maps

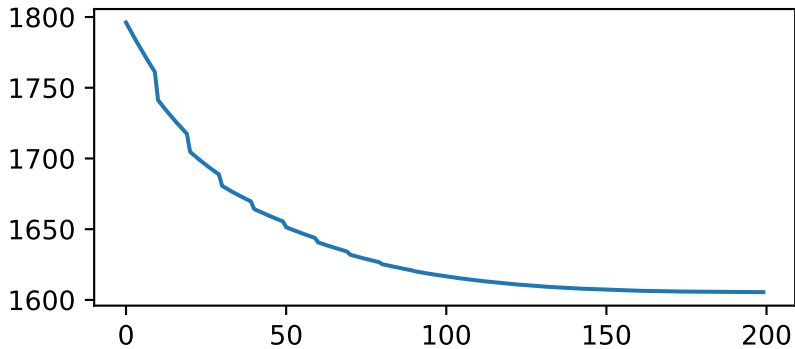

Supplement: supplementary_material [file attachment]

Final ll: -2.71

Test ll per decision

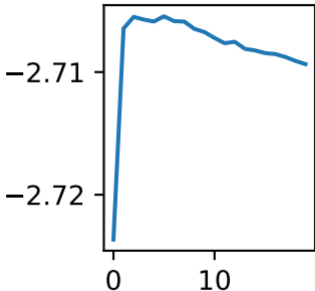

Iteration (outer loop)

Supplement: supplementary_material [file attachment]

Final: -1.1534

Test II per decision

-1.2

-1.3

0

10

Iteration (outer loop)

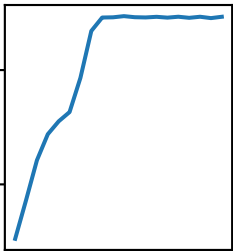

Supplement: supplementary_material [file attachment]

Final: -2.7548

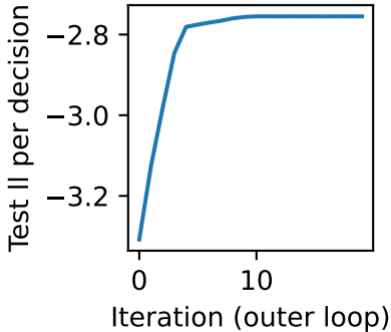

Supplement: supplementary_material [file attachment]

Final: -2.0739

Test II per decision

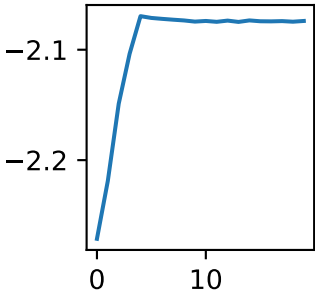

Iteration (outer loop)

Supplement: supplementary_material [file attachment]

Final ll: -128.11

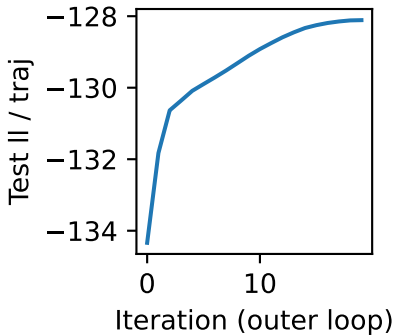

Supplement: supplementary_material [file attachment]

Loss for weight

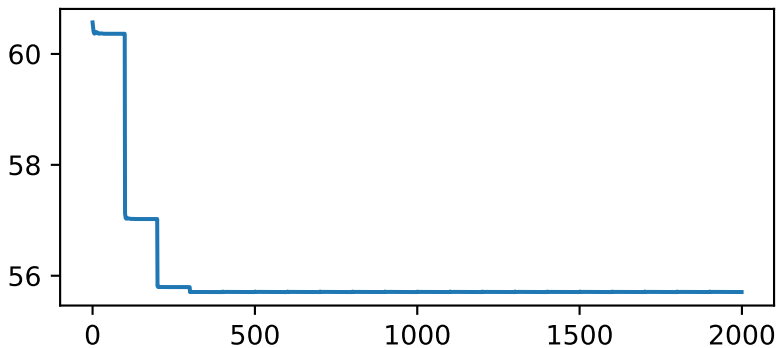

Loss for maps

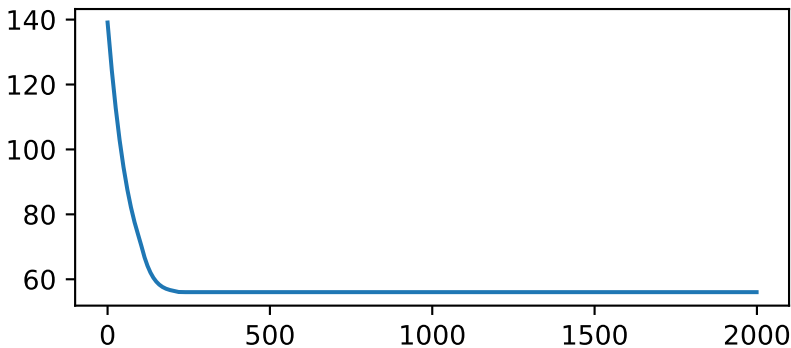

Supplement: supplementary_material [file attachment]

Loss for weight

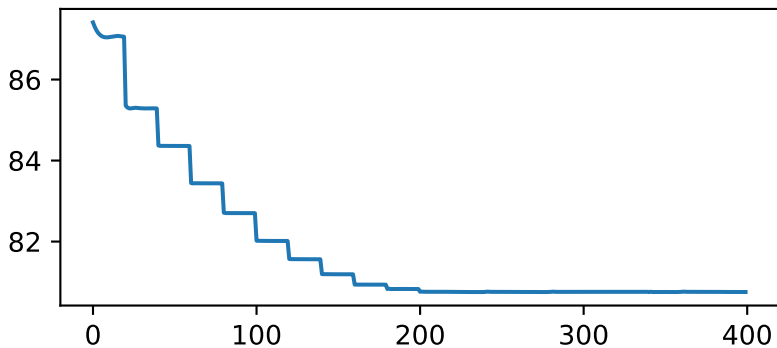

Loss for maps

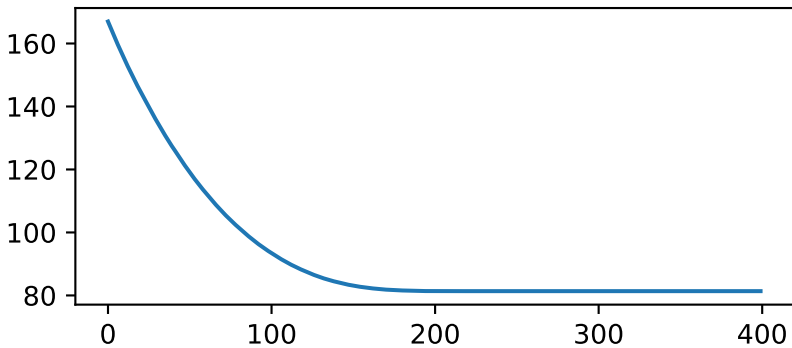

Supplement: supplementary_material [file attachment]

Final: -2.1596

Test II per decision

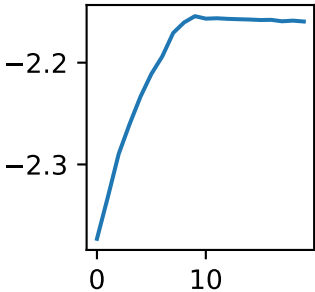

Iteration (outer loop)

Supplement: supplementary_material [file attachment]

Loss for weight

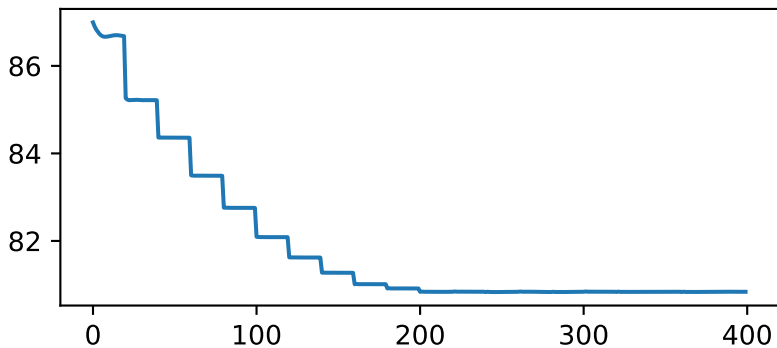

Loss for maps

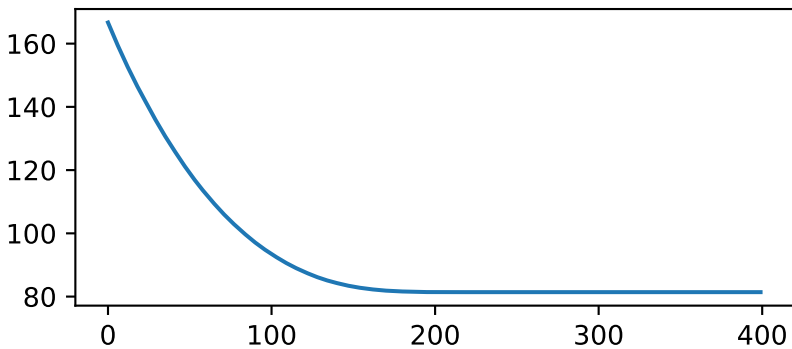

Supplement: supplementary_material [file attachment]

Final: -1.5822

Test II per decision

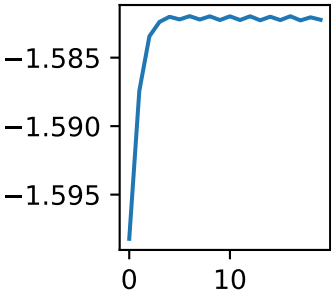

Iteration (outer loop)

Supplement: supplementary_material [file attachment]

Loss for weight

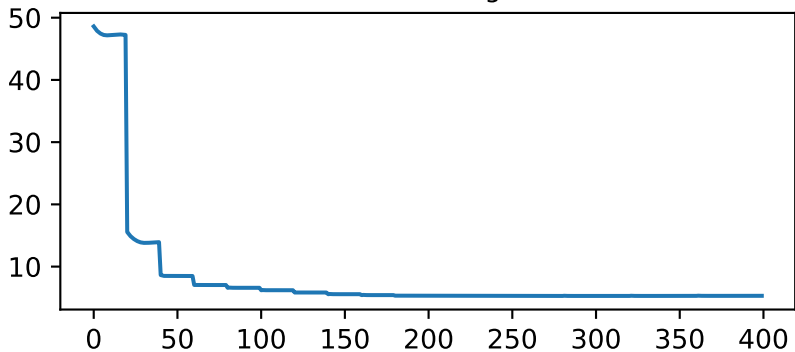

Loss for maps

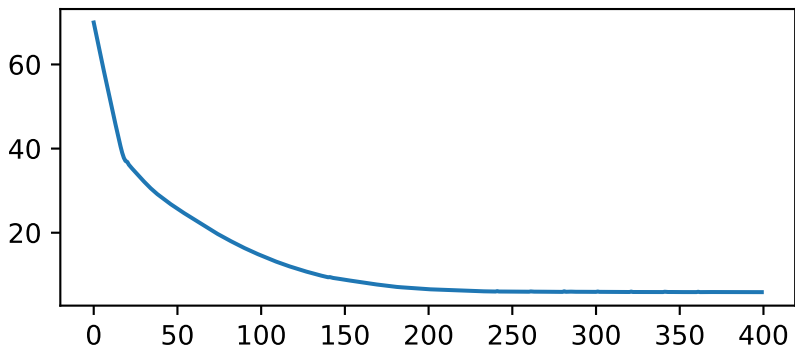

Supplement: supplementary_material [file attachment]

Loss for weight

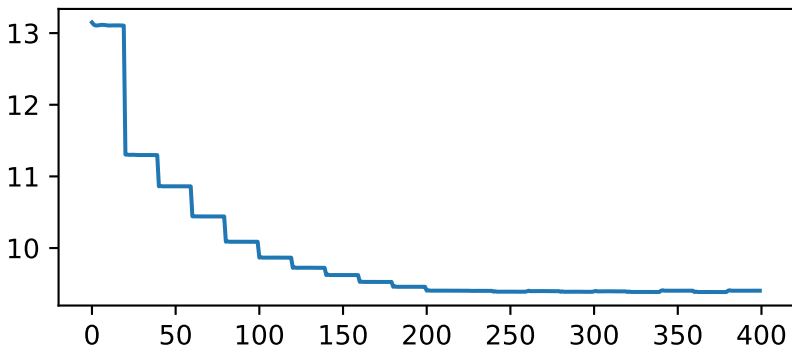

Loss for maps

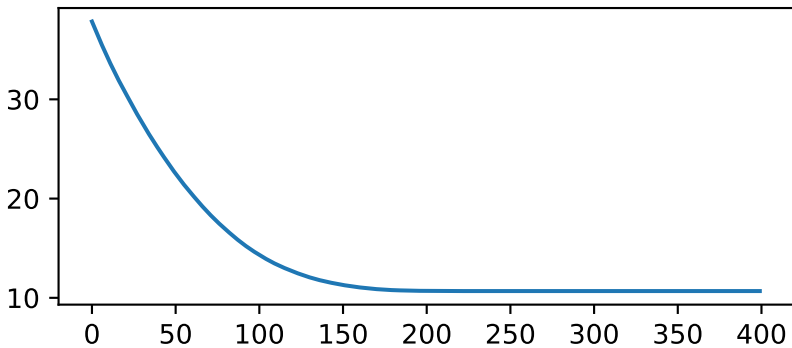

Supplement: supplementary_material [file attachment]

Final: -3.1231

Test II per decision

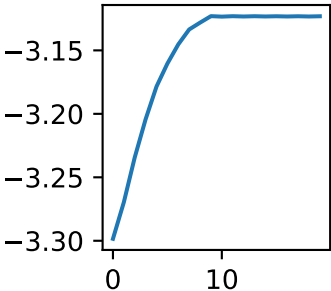

Iteration (outer loop)

Supplement: supplementary_material [file attachment]

Final II: -0.58

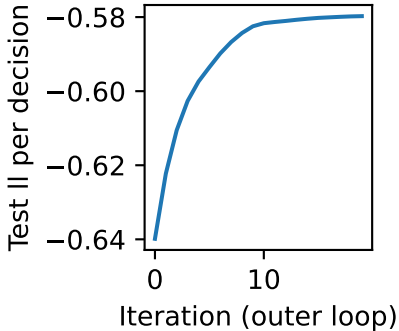

Supplement: supplementary_material [file attachment]

Loss for weight

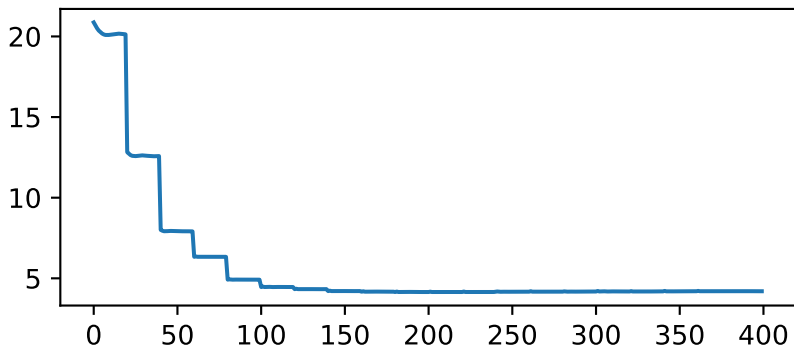

Loss for maps

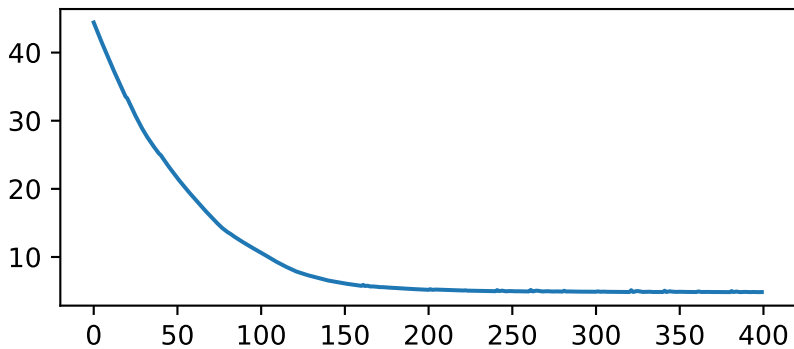

Supplement: supplementary_material [file attachment]

Final: -1.5842

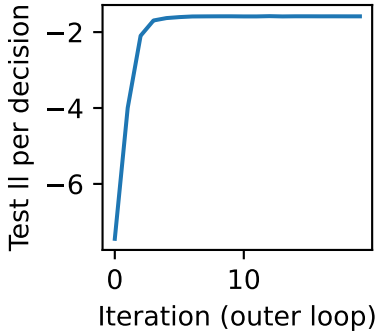

Supplement: supplementary_material [file attachment]

Final: -2.1418

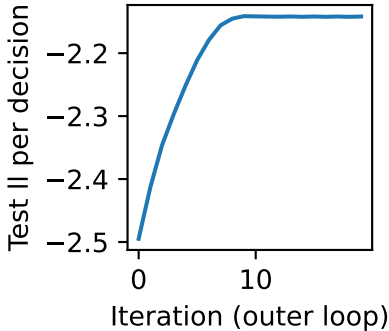

Supplement: supplementary_material [file attachment]

Loss for weight

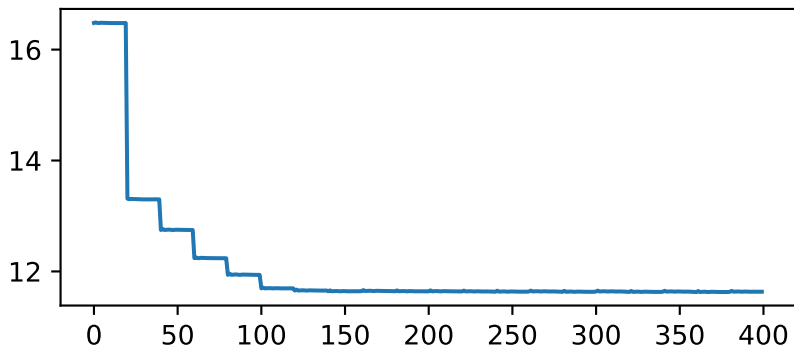

Loss for maps

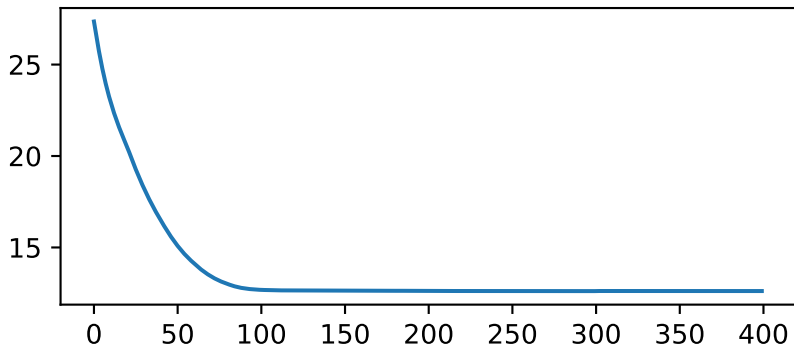

Supplement: supplementary_material [file attachment]

Loss for weight

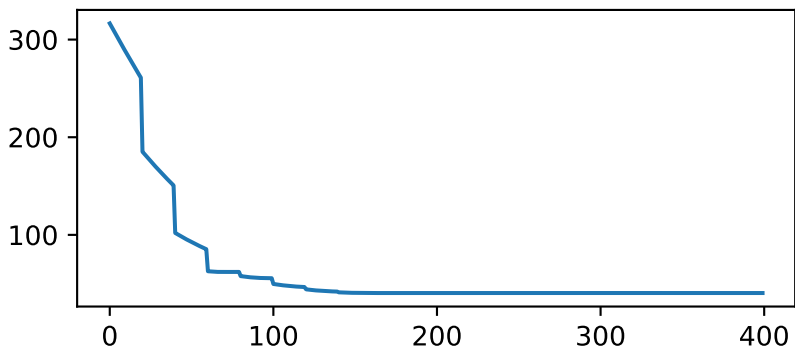

Loss for maps

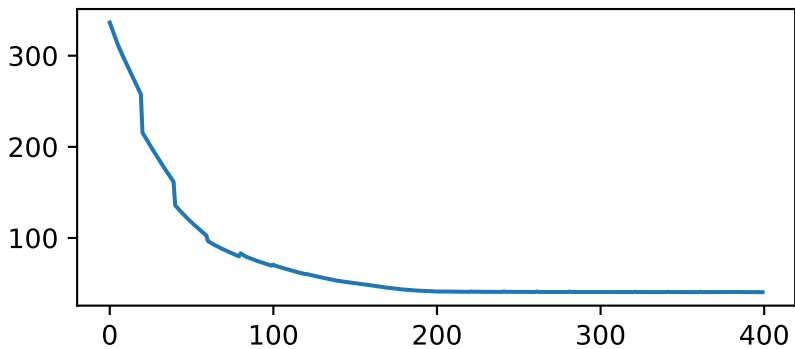

Supplement: supplementary_material [file attachment]

Final: -3.2032

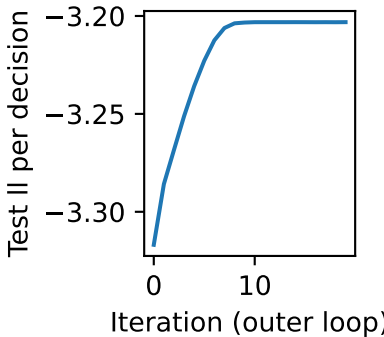

Supplement: supplementary_material [file attachment]

Loss for weight

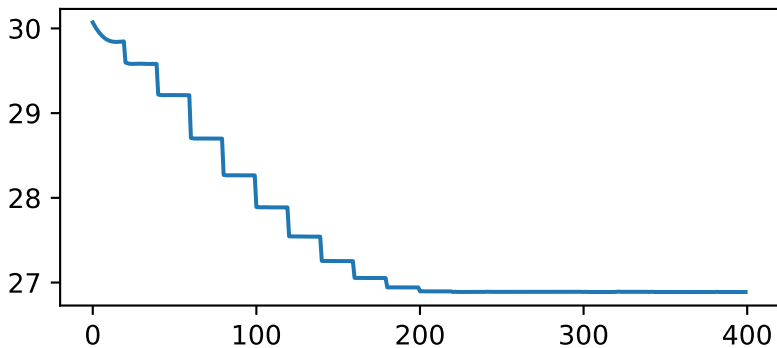

Loss for maps

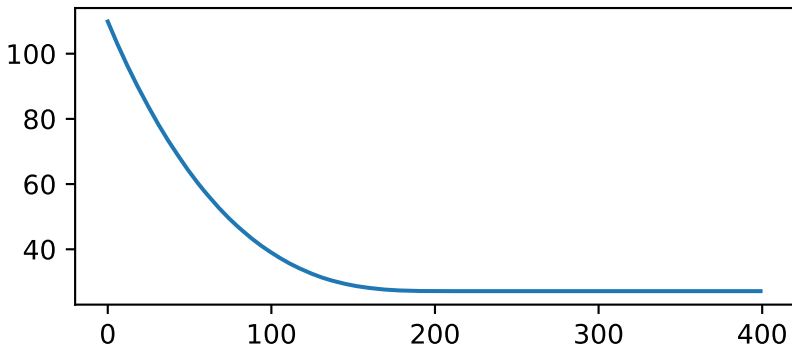

Supplement: supplementary_material [file attachment]

Loss for weight

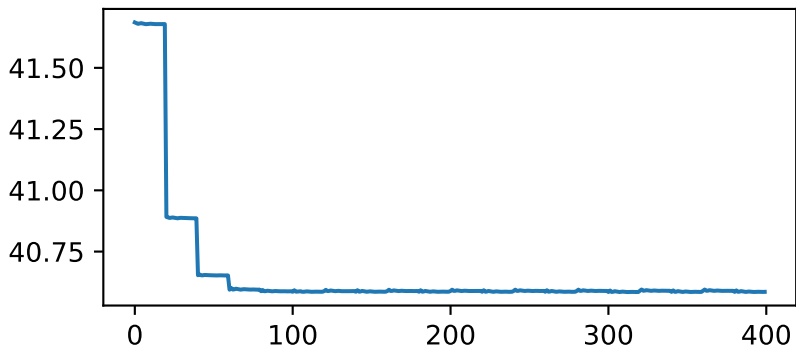

Loss for maps

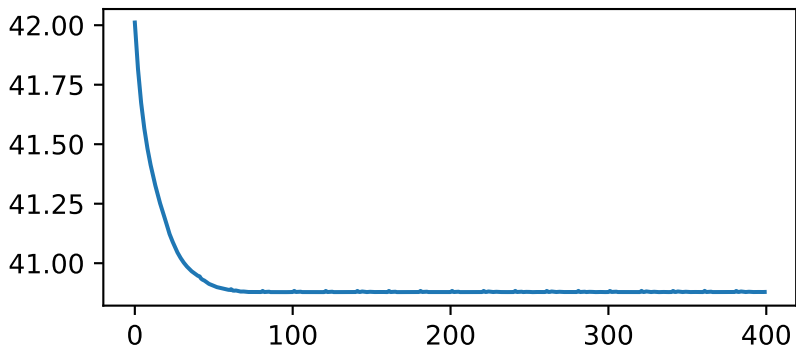

Supplement: supplementary_material [file attachment]

Loss for weight

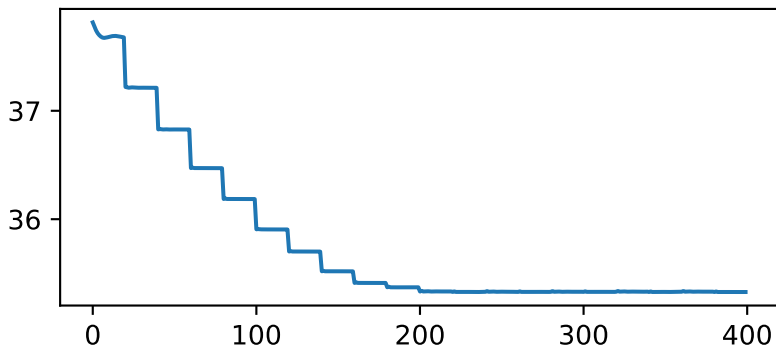

Loss for maps

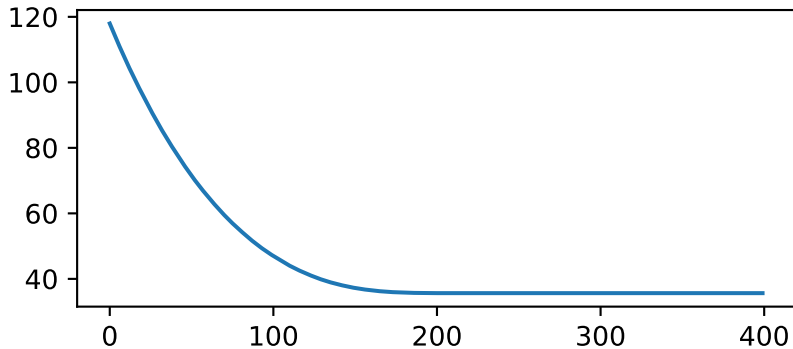

Supplement: supplementary_material [file attachment]

Final: -2.0013

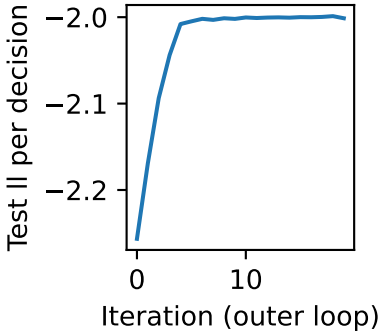

Supplement: supplementary_material [file attachment]

Final: -1.5824

Test II per decision

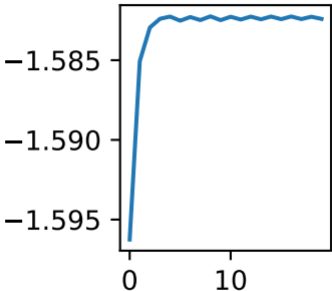

Iteration (outer loop)

Supplement: supplementary_material [file attachment]

Final: -2.7088

Test II per decision

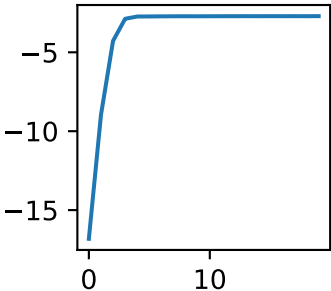

Iteration (outer loop)

Supplement: supplementary_material [file attachment]

Loss for weight

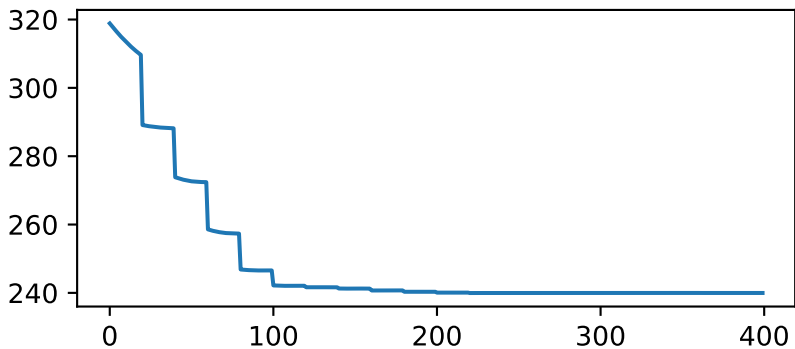

Loss for maps

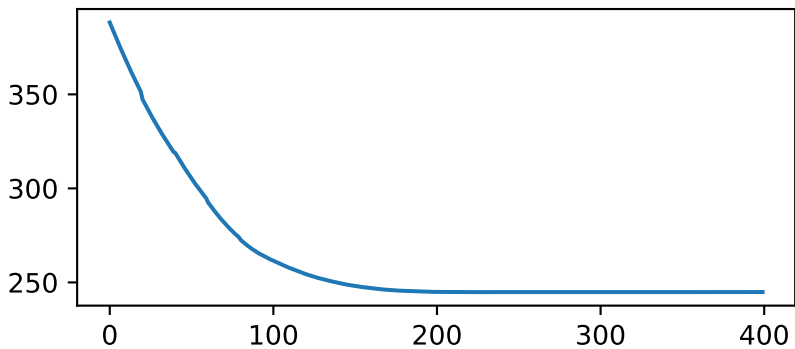

Supplement: supplementary_material [file attachment]

Loss for weight

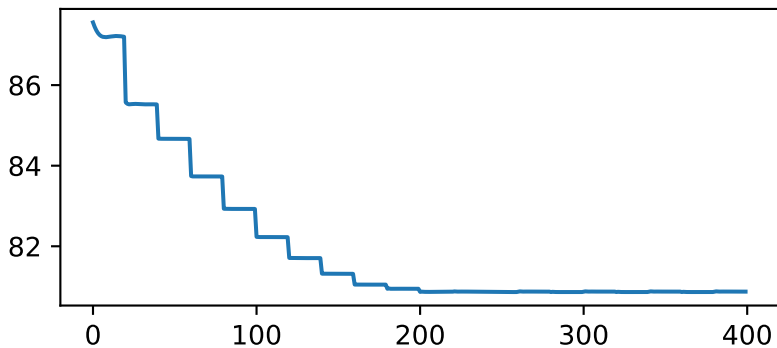

Loss for maps

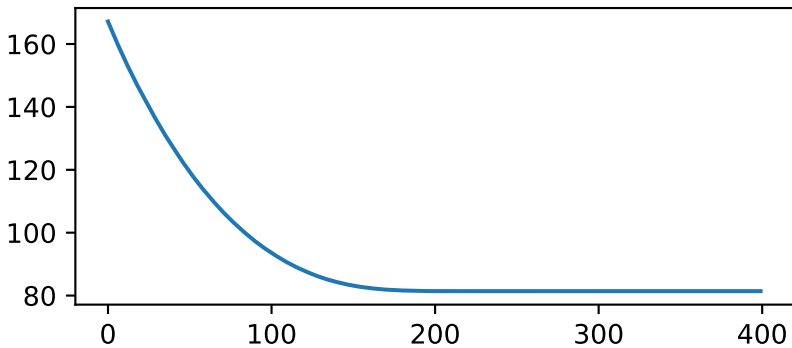

Supplement: supplementary_material [file attachment]

Final: -2.2056

Test II per decision

-2.25

-2.30

0

10

Iteration (outer loop)

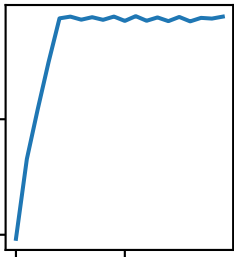

Supplement: supplementary_material [file attachment]

Loss for weight

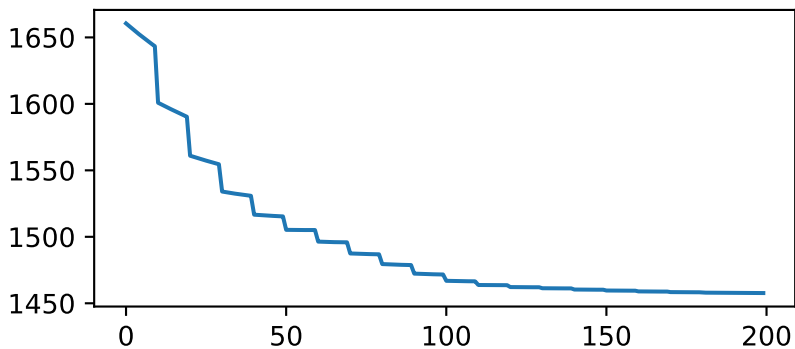

Loss for maps

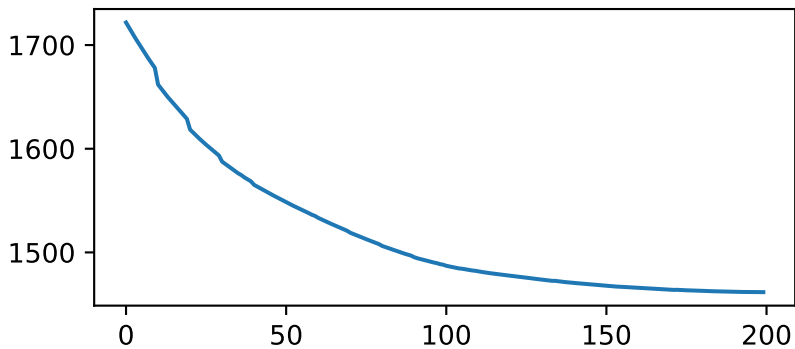

Supplement: supplementary_material [file attachment]

Final: -1.5848

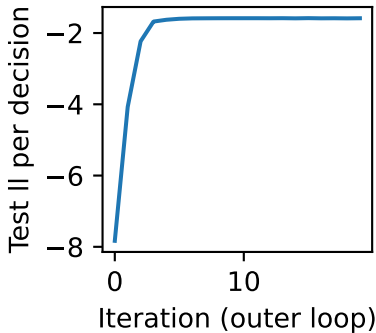

Supplement: supplementary_material [file attachment]

Loss for weight

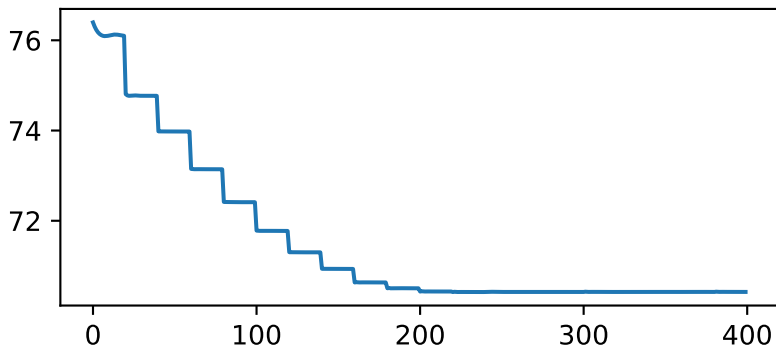

Loss for maps

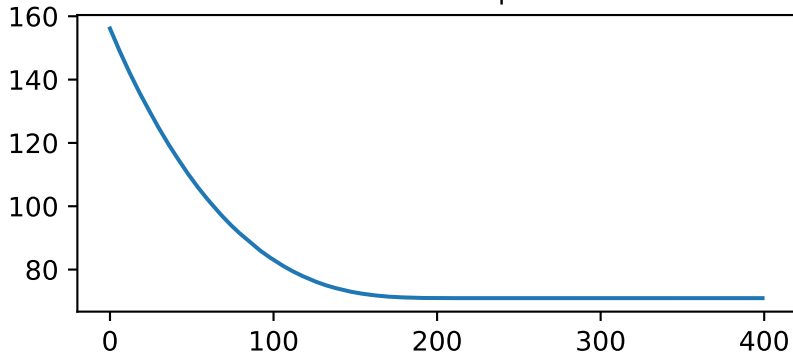

Supplement: supplementary_material [file attachment]

Final: -1.5701

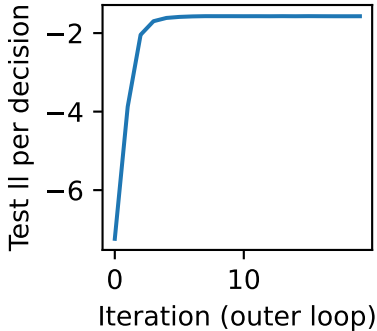

Supplement: supplementary_material [file attachment]

Final: -2.7605

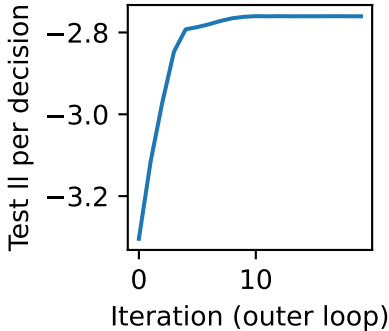

Supplement: supplementary_material [file attachment]

Loss for weight

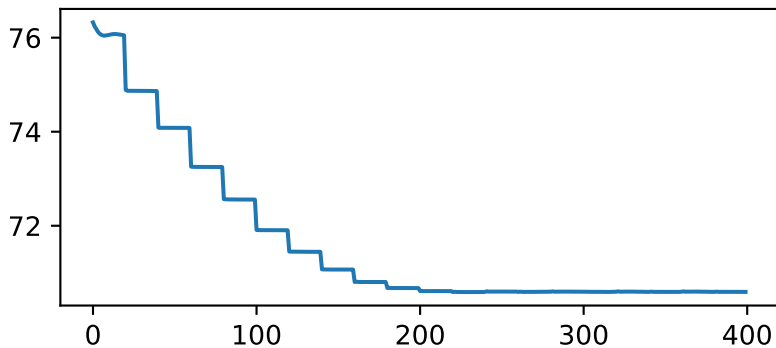

Loss for maps

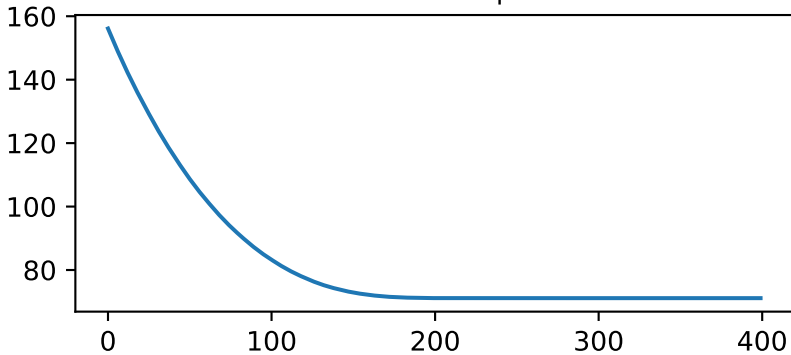

Supplement: supplementary_material [file attachment]

Loss for weight

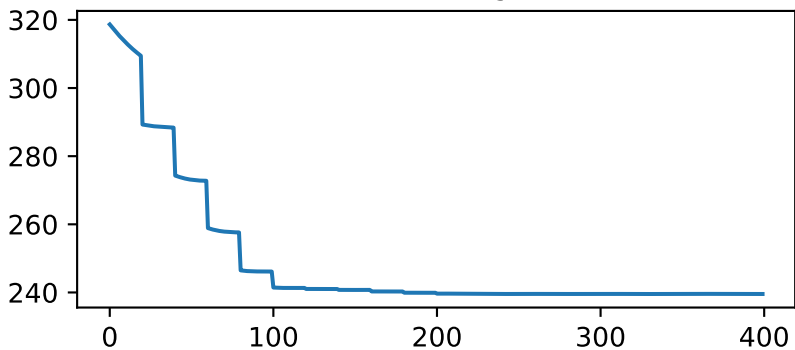

Loss for maps

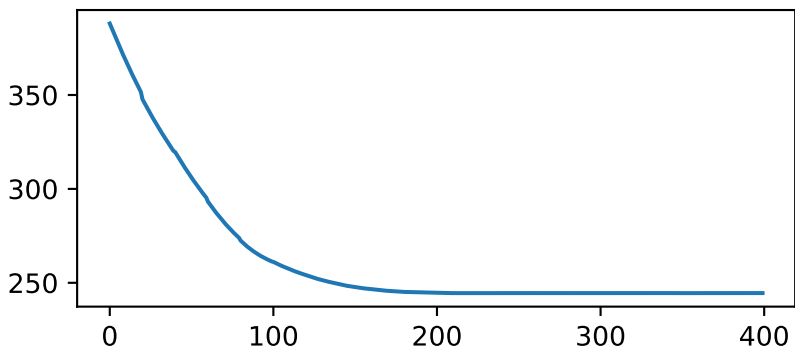

Supplement: supplementary_material [file attachment]

Loss for weight

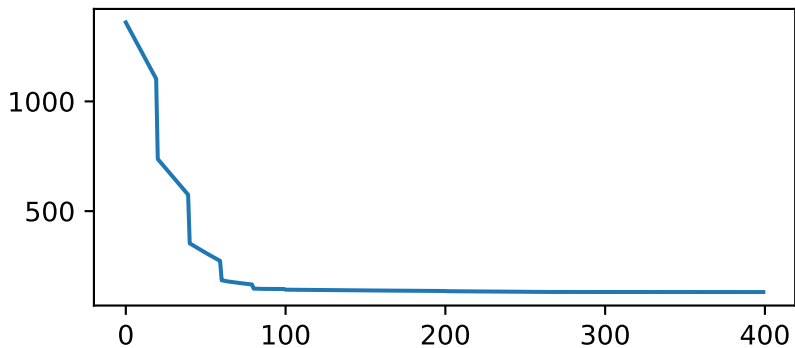

Loss for maps

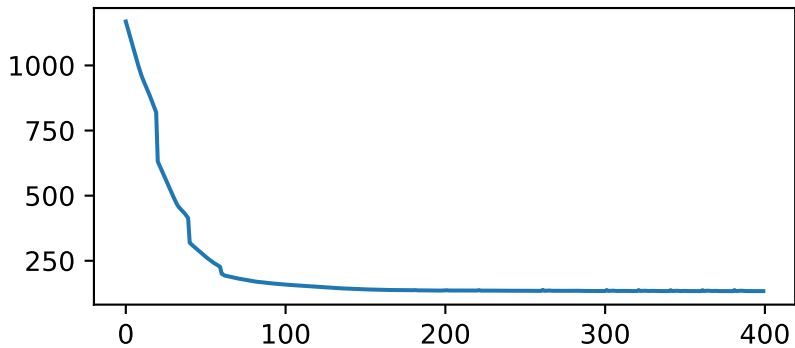

Supplement: supplementary_material [file attachment]

Final: -1.5621

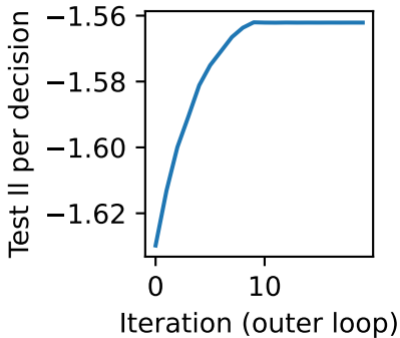

Supplement: supplementary_material [file attachment]

Loss for weight

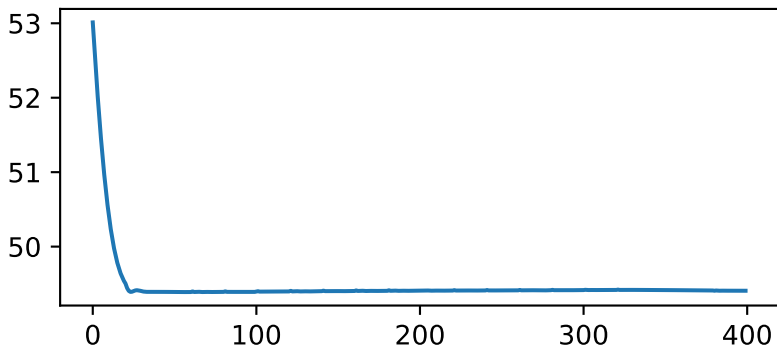

Loss for maps

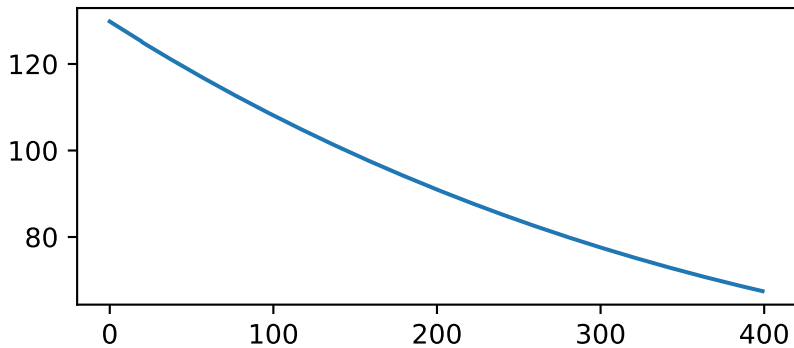

Supplement: supplementary_material [file attachment]

Final II: -0.58

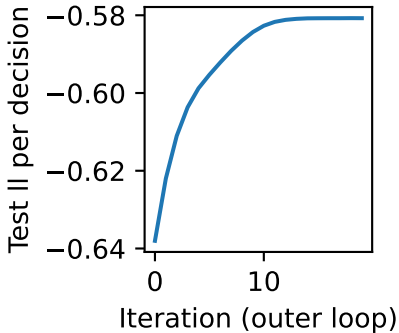

Supplement: supplementary_material [file attachment]

Final: -3.1185

Test II per decision

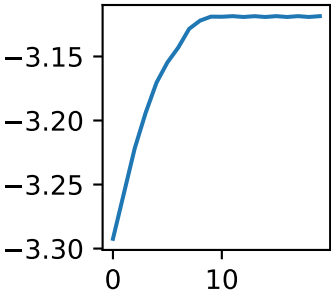

Iteration (outer loop)

Supplement: supplementary_material [file attachment]

Loss for weight

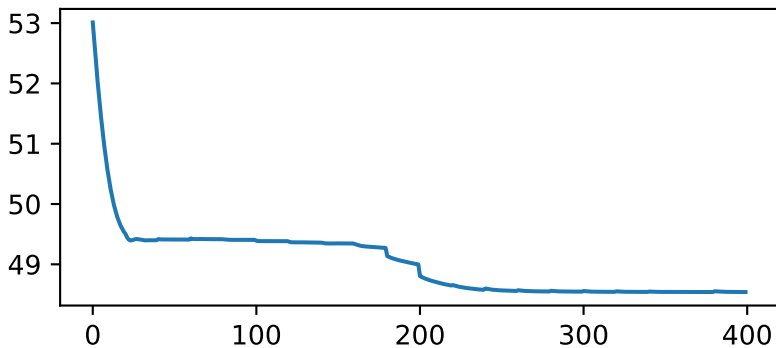

Loss for maps

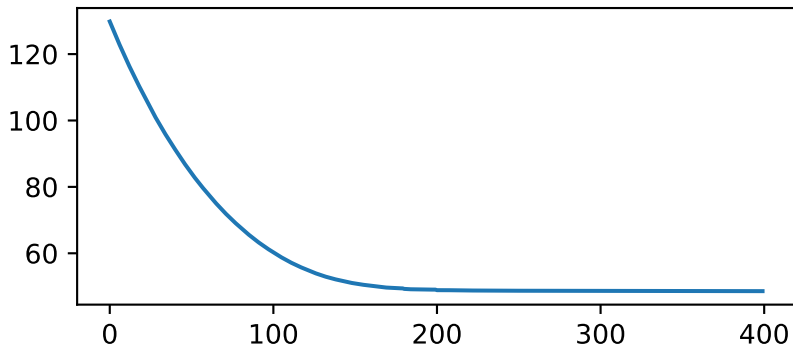

Supplement: supplementary_material [file attachment]

Loss for weight

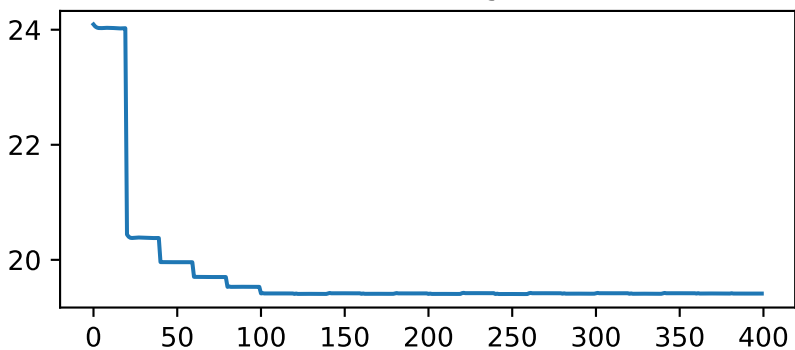

Loss for maps

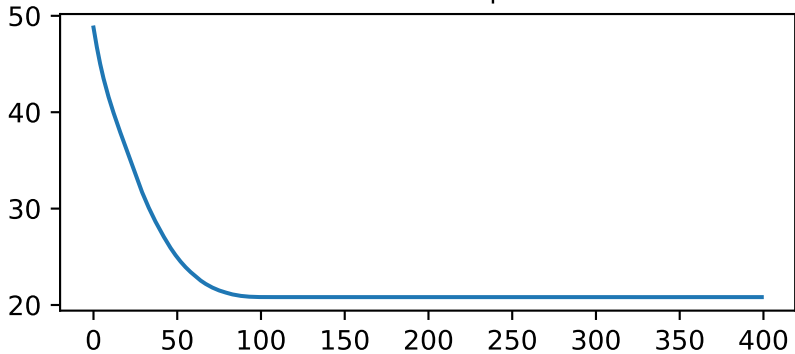

Supplement: supplementary_material [file attachment]

Loss for weight

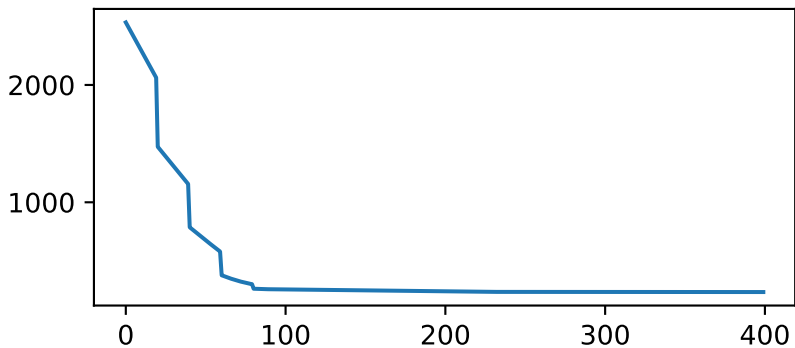

Loss for maps

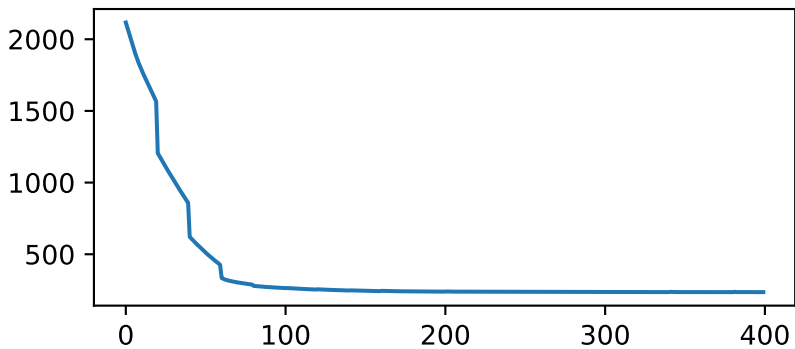

Supplement: supplementary_material [file attachment]

Loss for weight

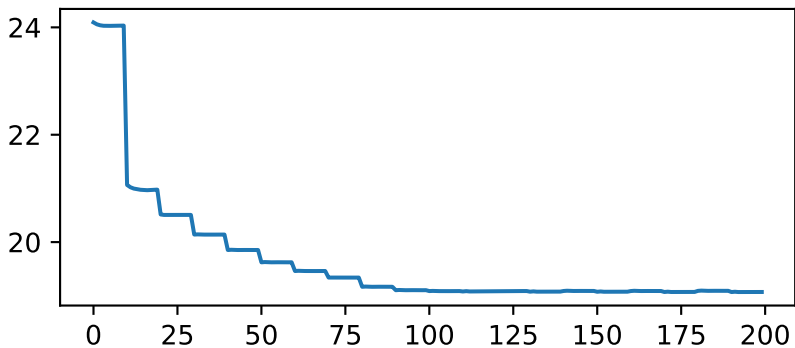

Loss for maps

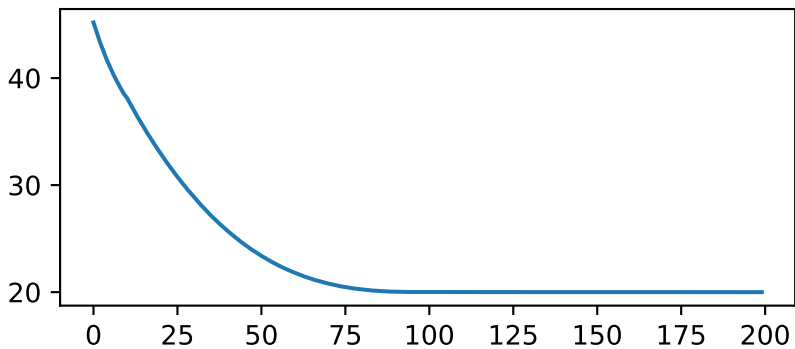

Supplement: supplementary_material [file attachment]

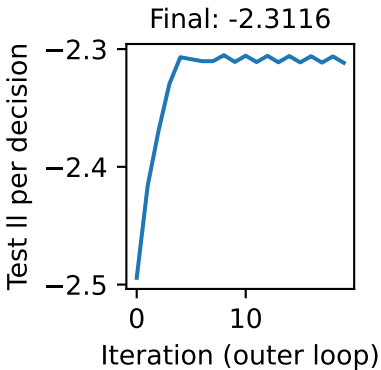

Supplement: supplementary_material [file attachment]

Loss for weight

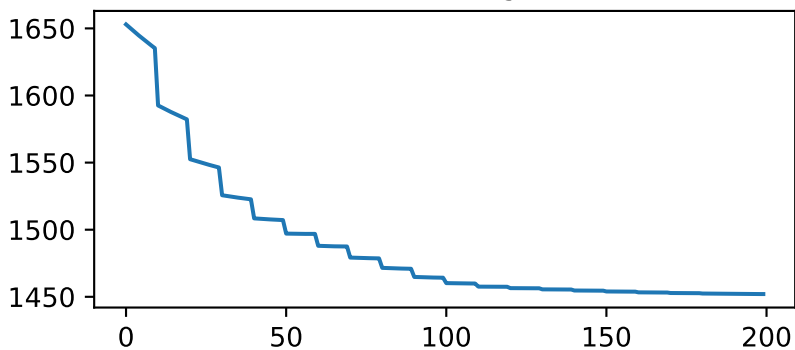

Loss for maps

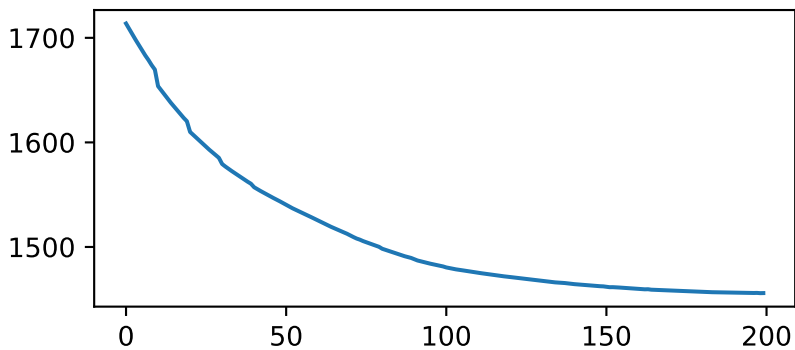

Supplement: supplementary_material [file attachment]

Final ll: -128.06

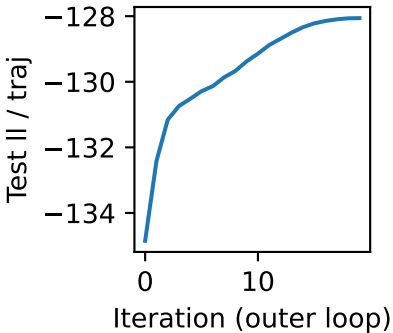

Supplement: supplementary_material [file attachment]

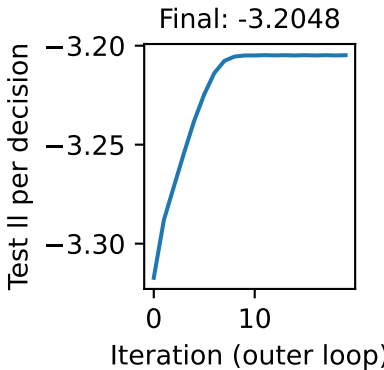

Supplement: supplementary_material [file attachment]

Loss for weight

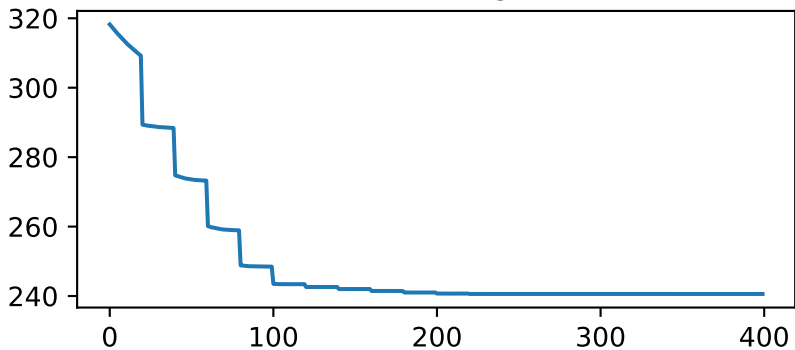

Loss for maps

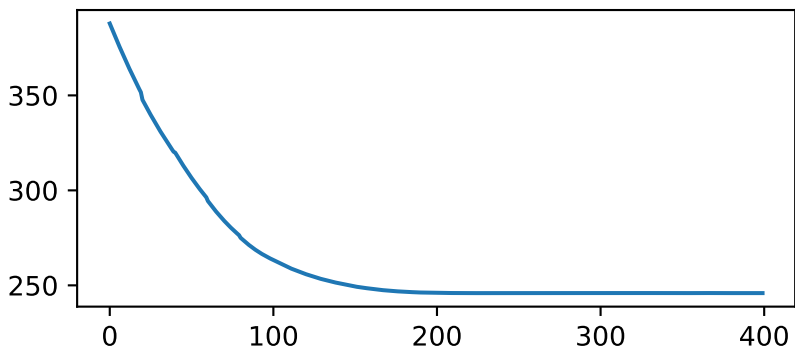

Supplement: supplementary_material [file attachment]

Final II: -0.58

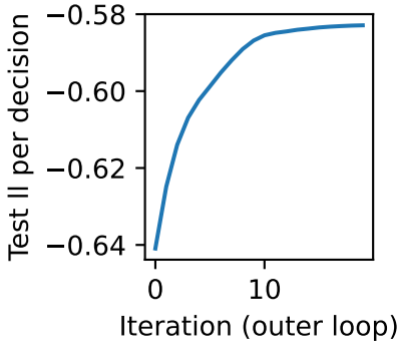

Supplement: supplementary_material [file attachment]

Loss for weight

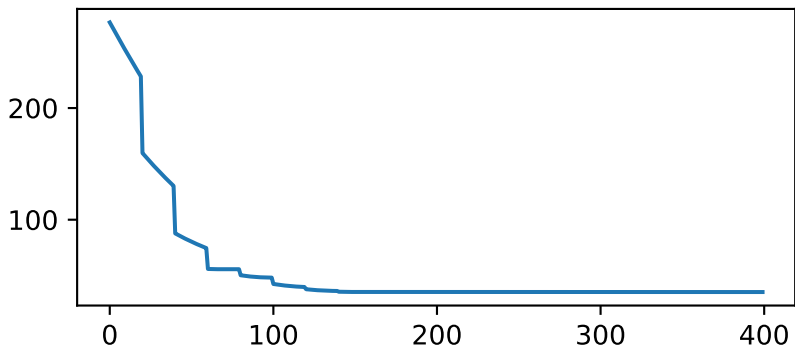

Loss for maps

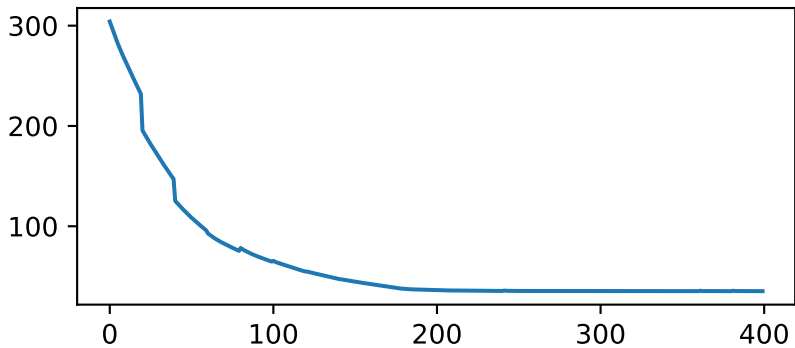

Supplement: supplementary_material [file attachment]

Loss for weight

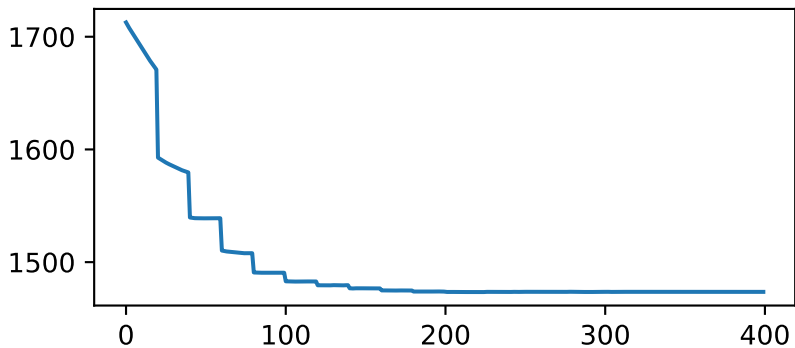

Loss for maps

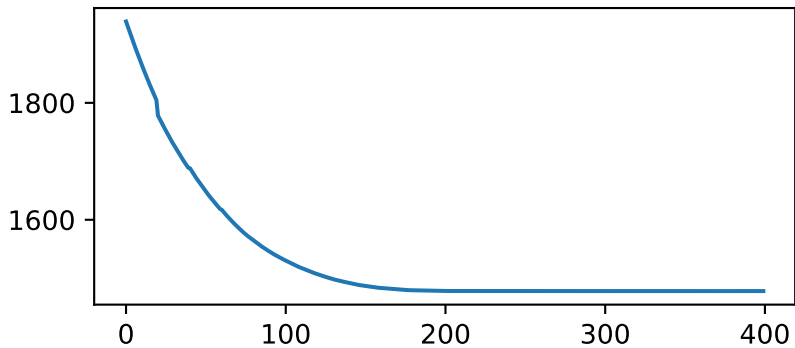

Supplement: supplementary_material [file attachment]

Loss for weight

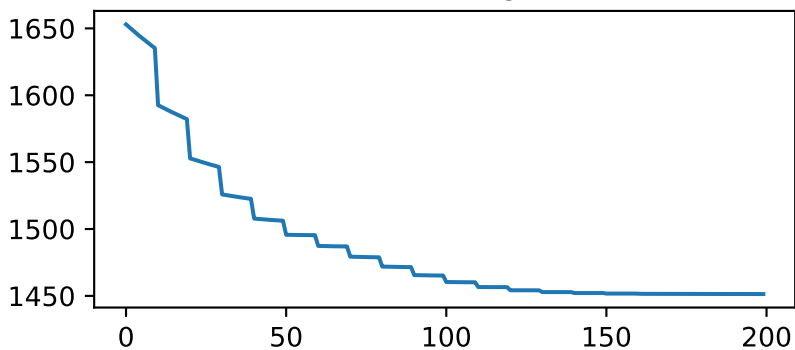

Loss for maps

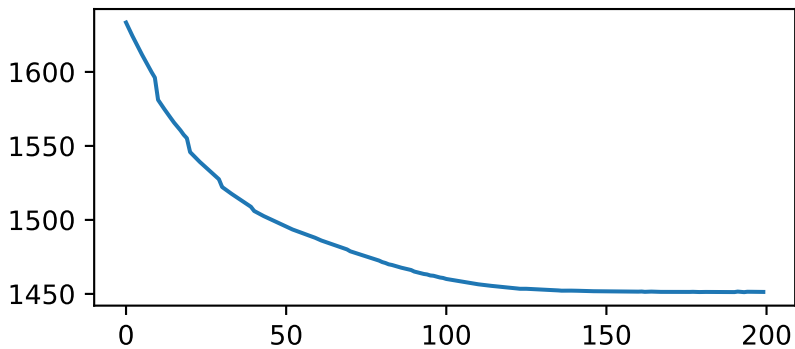

Supplement: supplementary_material [file attachment]

Final: -1.5849

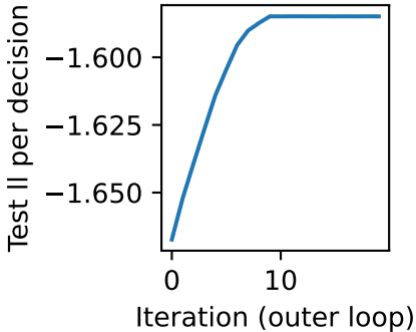

Supplement: supplementary_material [file attachment]

Loss for weight

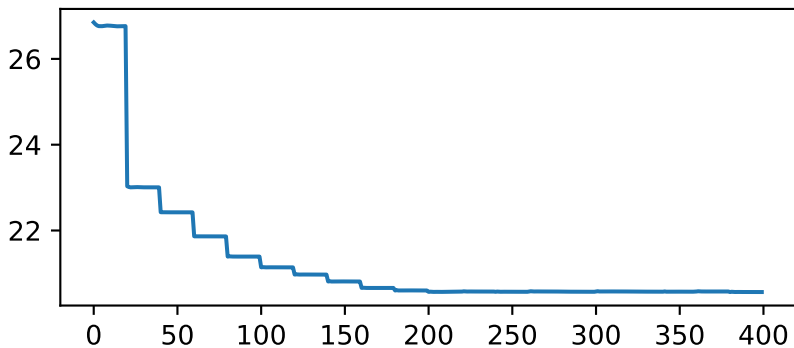

Loss for maps

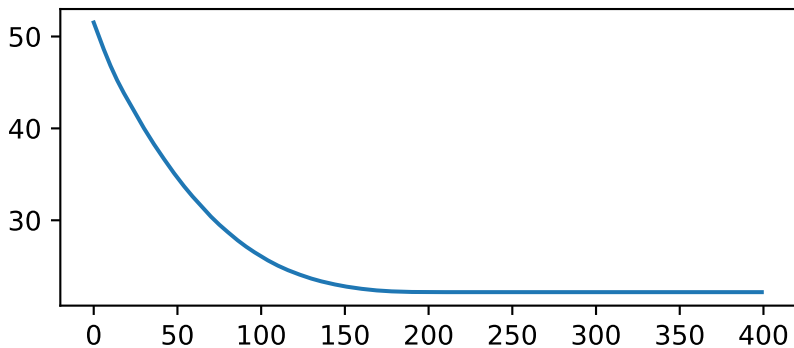

Supplement: supplementary_material [file attachment]
