# Supplementary material (part 2 of 3)
Source: ML conference proceedings conference paper supplement (https://openreview.net/forum?id=KiDGtYCPcv)

Final: -1.5899

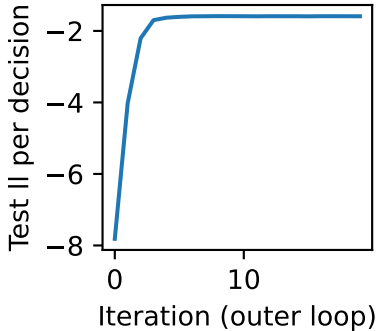

Supplement: supplementary_material [file attachment]

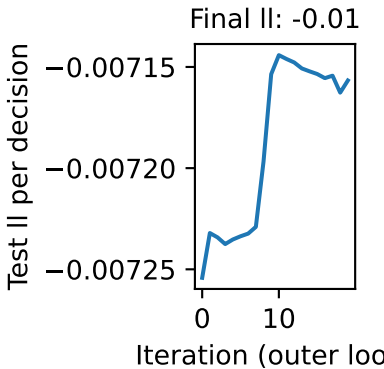

Supplement: supplementary_material [file attachment]

Loss for weight

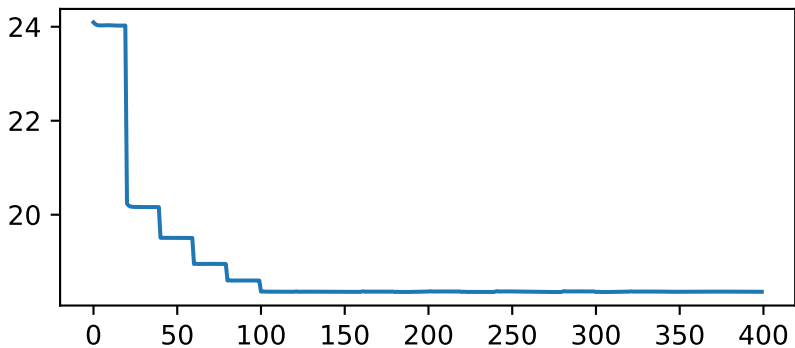

Loss for maps

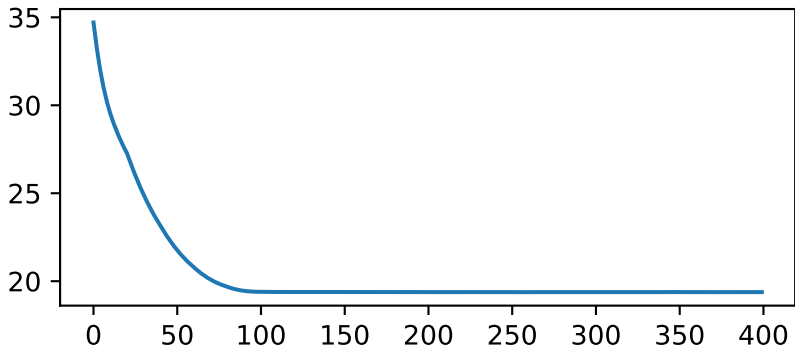

Supplement: supplementary_material [file attachment]

Loss for weight

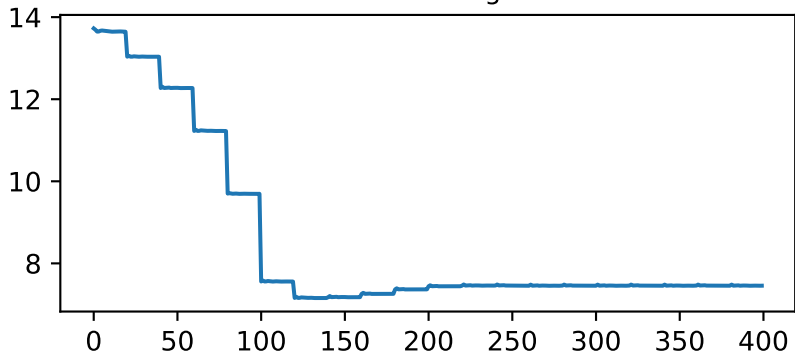

Loss for maps

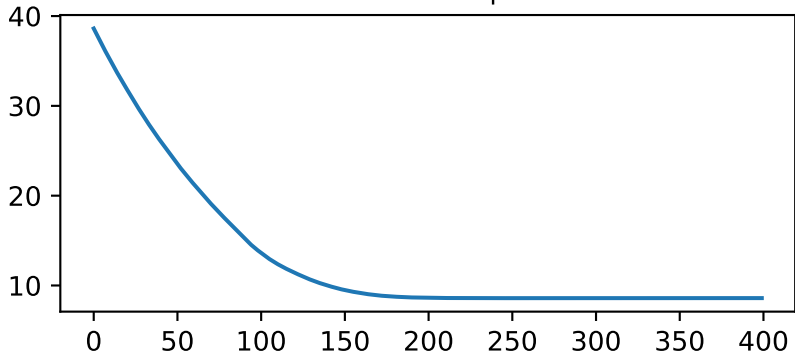

Supplement: supplementary_material [file attachment]

Final: -1.0681

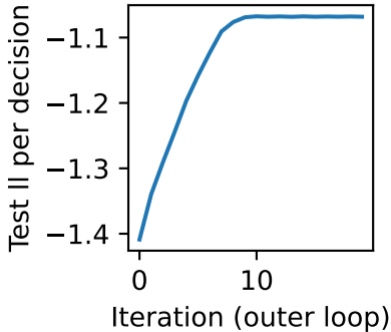

Supplement: supplementary_material [file attachment]

Final: -1.5743

Test II per decision

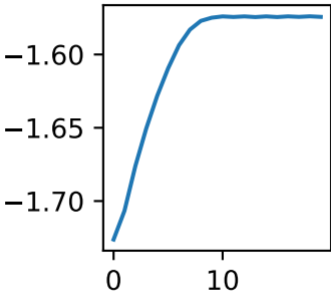

Iteration (outer loop)

Supplement: supplementary_material [file attachment]

Loss for weight

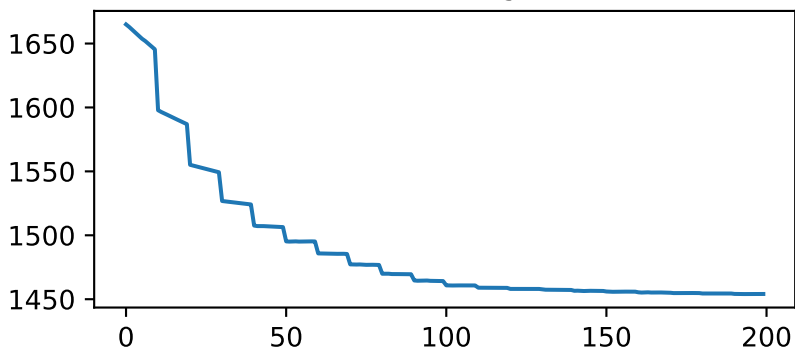

Loss for maps

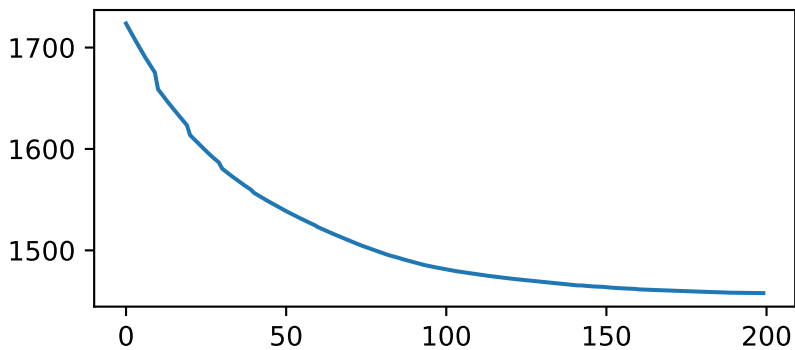

Supplement: supplementary_material [file attachment]

Loss for weight

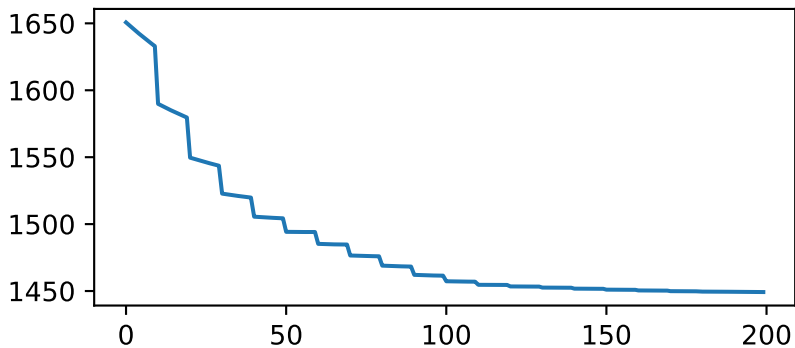

Loss for maps

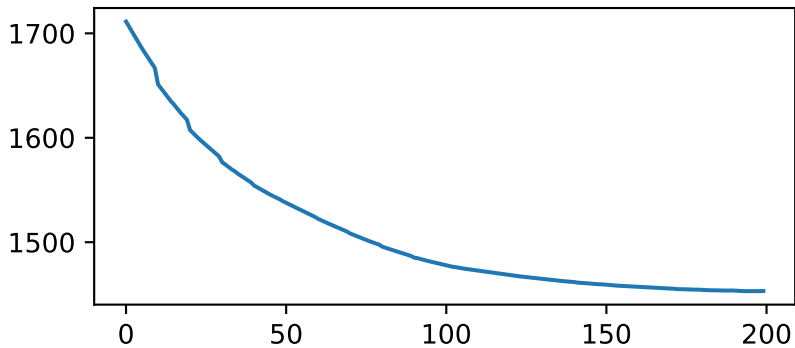

Supplement: supplementary_material [file attachment]

Loss for weight

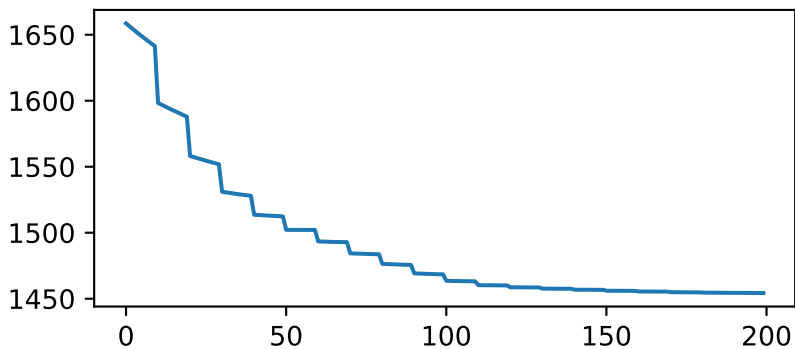

Loss for maps

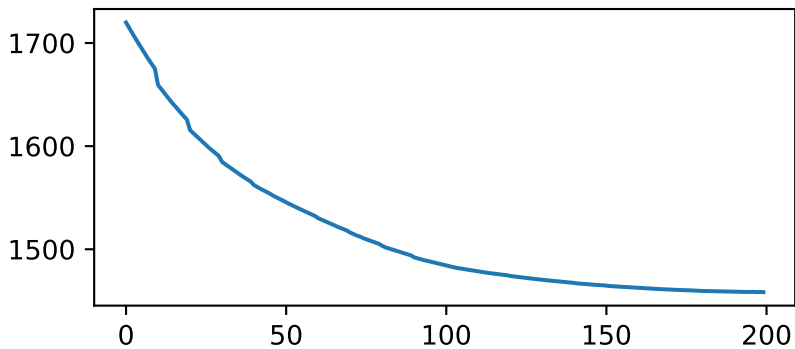

Supplement: supplementary_material [file attachment]

Loss for weight

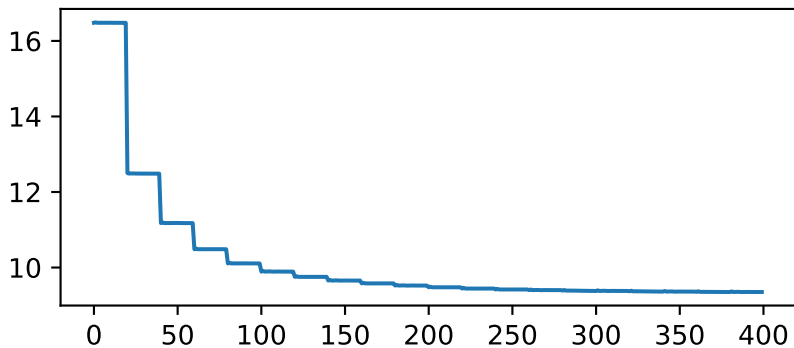

Loss for maps

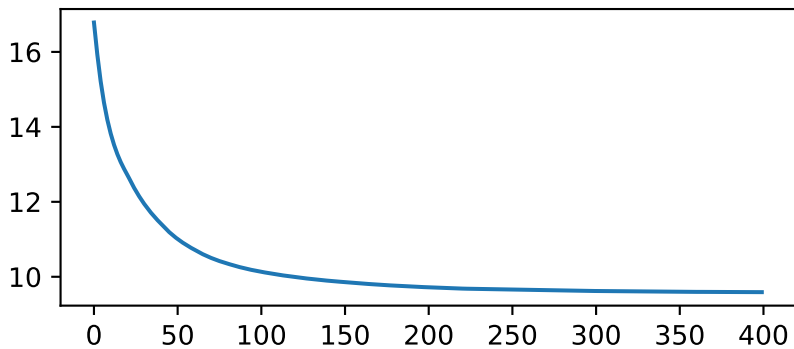

Supplement: supplementary_material [file attachment]

Loss for weight

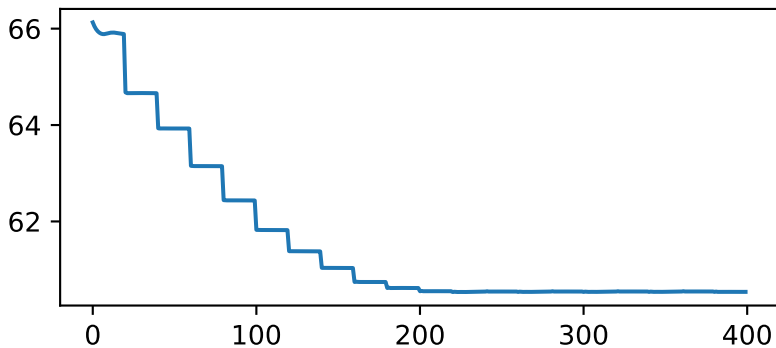

Loss for maps

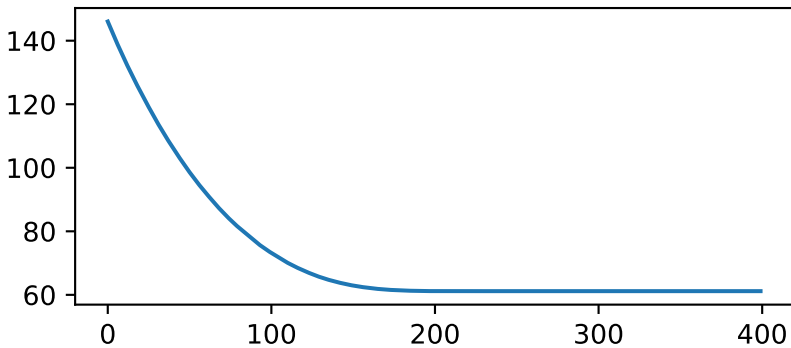

Supplement: supplementary_material [file attachment]

Final II: -0.58

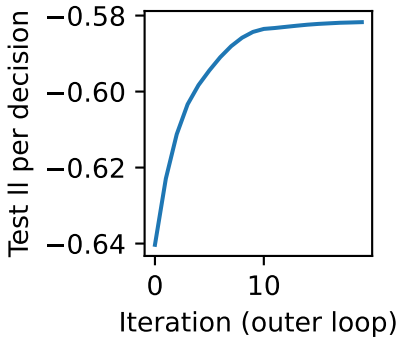

Supplement: supplementary_material [file attachment]

Final: -2.1585

Test II per decision

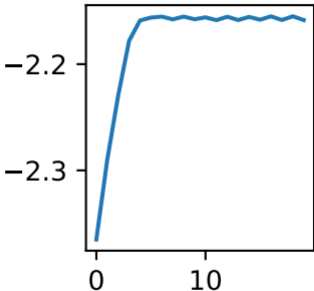

Iteration (outer loop)

Supplement: supplementary_material [file attachment]

Loss for weight

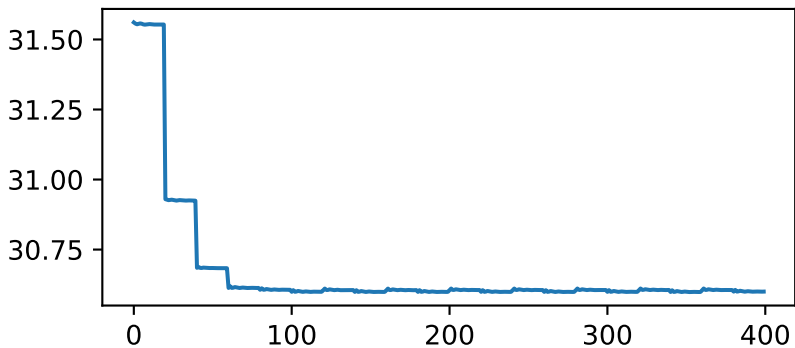

Loss for maps

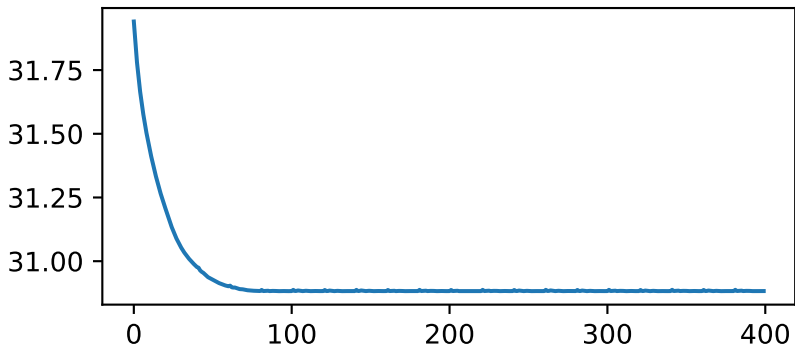

Supplement: supplementary_material [file attachment]

Final: -2.9674

Test II per decision

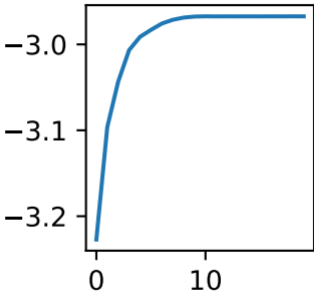

Iteration (outer loop)

Supplement: supplementary_material [file attachment]

Final: -1.5529

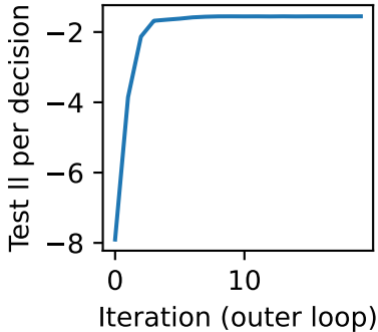

Supplement: supplementary_material [file attachment]

Loss for weight

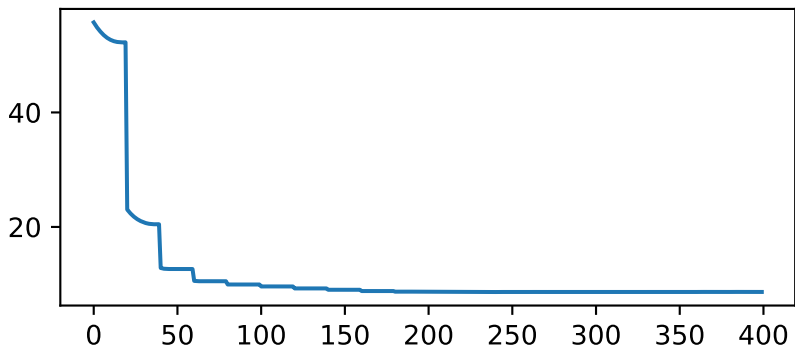

Loss for maps

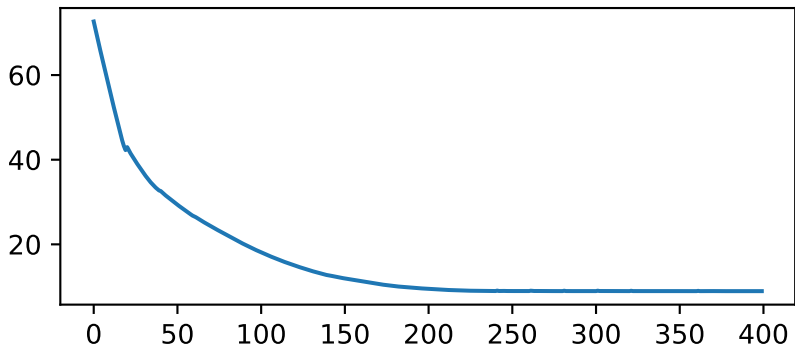

Supplement: supplementary_material [file attachment]

Loss for weight

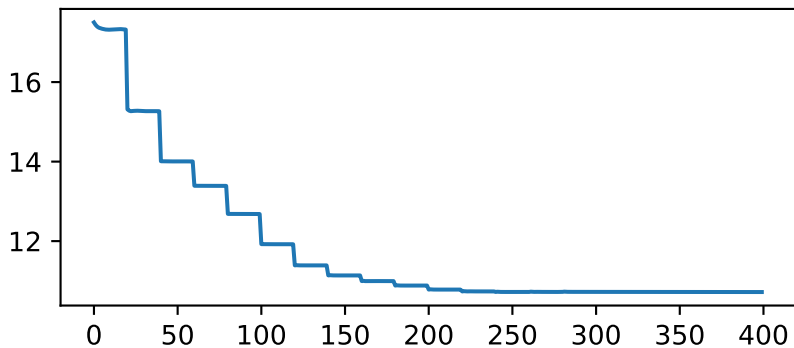

Loss for maps

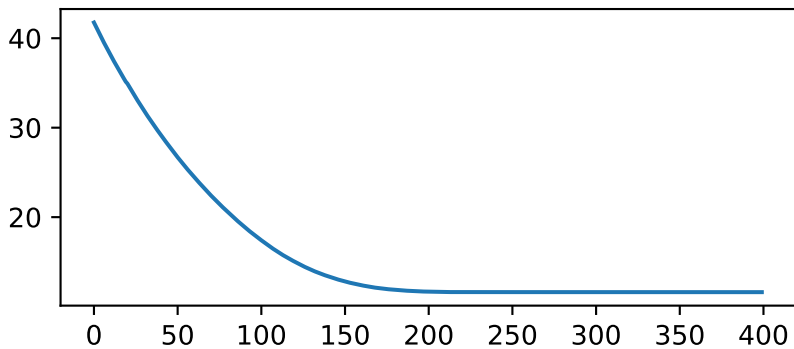

Supplement: supplementary_material [file attachment]

Final: -1.5719

Test II per decision

-1.60

-1.65

0

10

Iteration (outer loop)

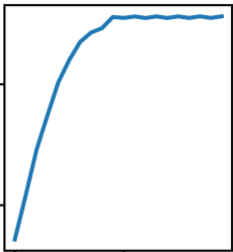

Supplement: supplementary_material [file attachment]

Final: -1.5891

Test II per decision

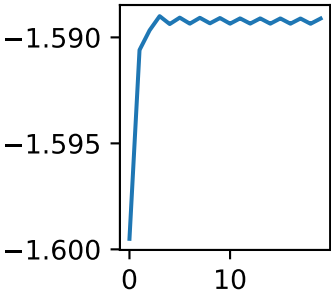

Iteration (outer loop)

Supplement: supplementary_material [file attachment]

Final: -2.4811

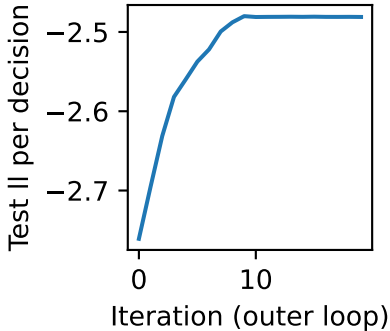

Supplement: supplementary_material [file attachment]

Final: -1.3038

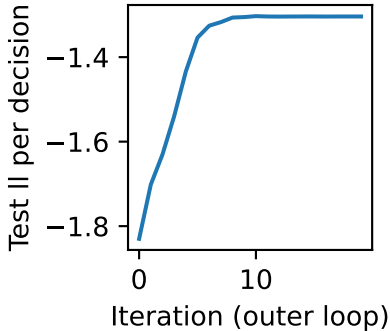

Supplement: supplementary_material [file attachment]

Final: -3.1452

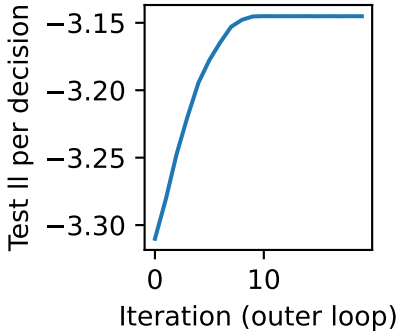

Supplement: supplementary_material [file attachment]

Final: -2.1875

Test II per decision

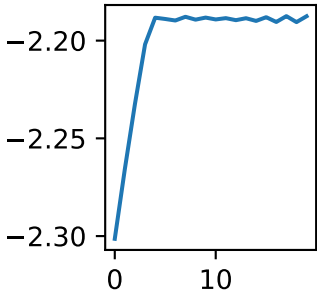

Iteration (outer loop)

Supplement: supplementary_material [file attachment]

Loss for weight

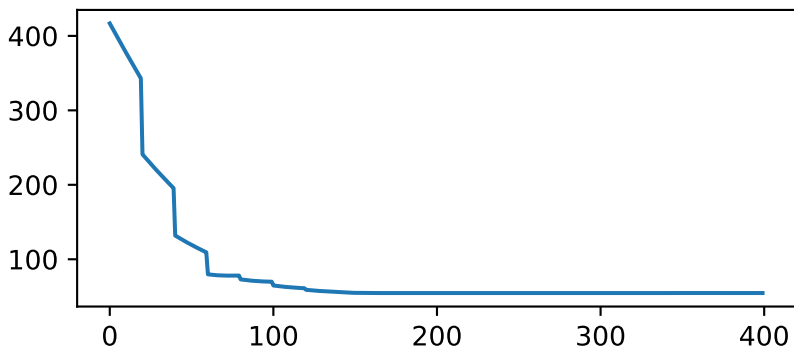

Loss for maps

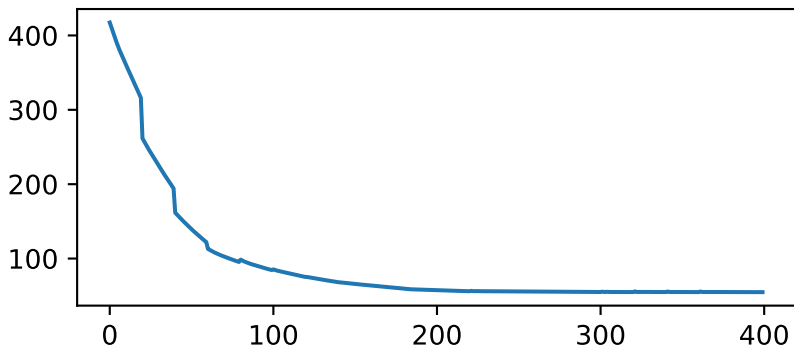

Supplement: supplementary_material [file attachment]

Loss for weight

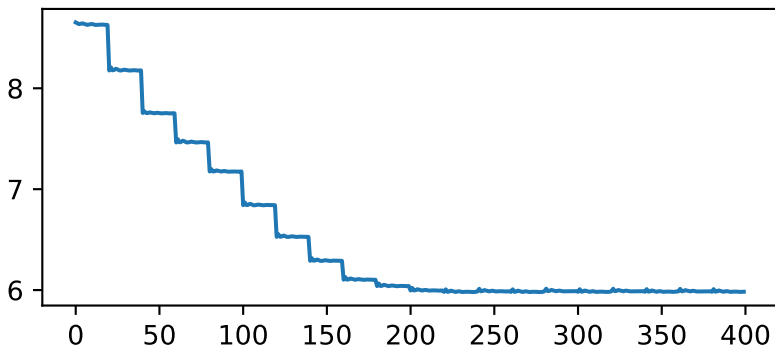

Loss for maps

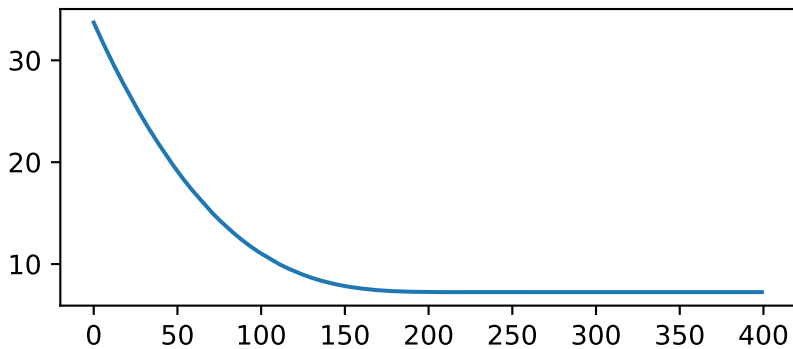

Supplement: supplementary_material [file attachment]

Loss for weight

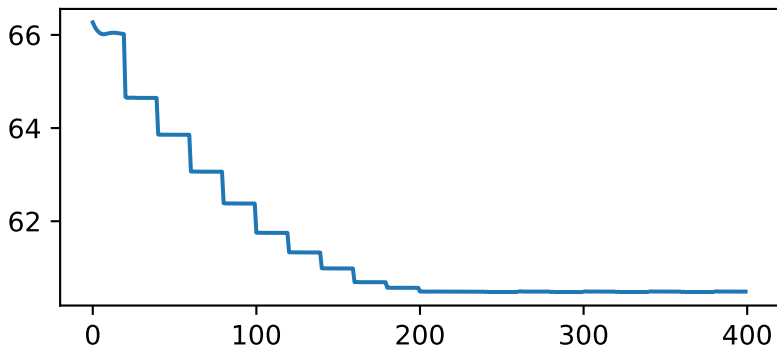

Loss for maps

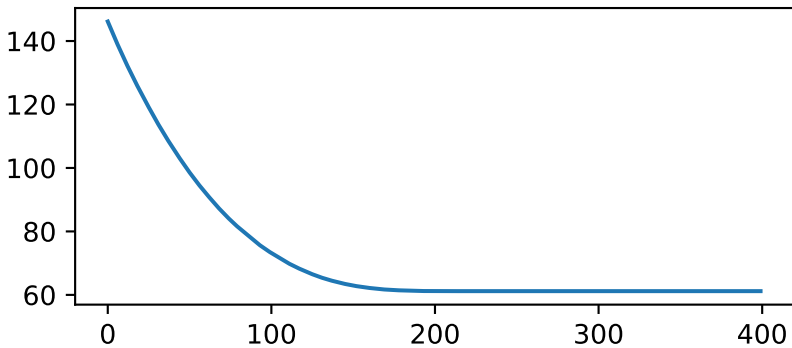

Supplement: supplementary_material [file attachment]

Loss for weight

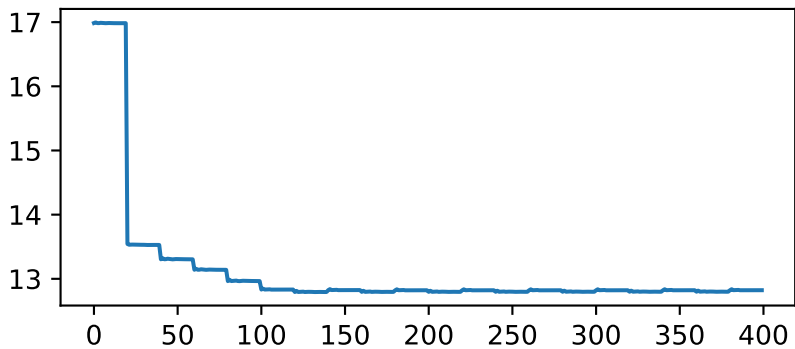

Loss for maps

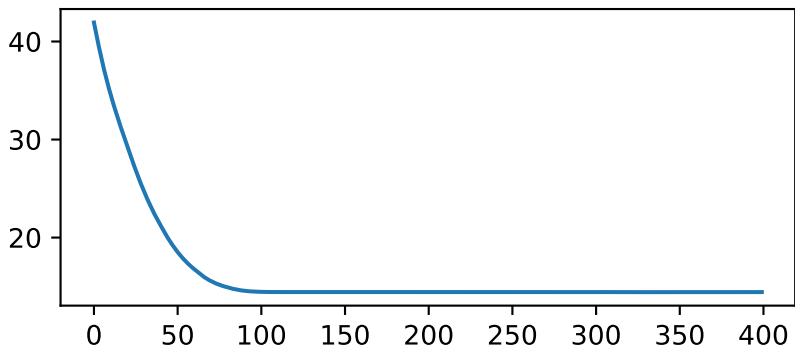

Supplement: supplementary_material [file attachment]

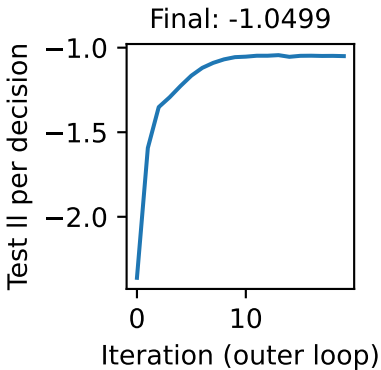

Supplement: supplementary_material [file attachment]

Final: -1.5812

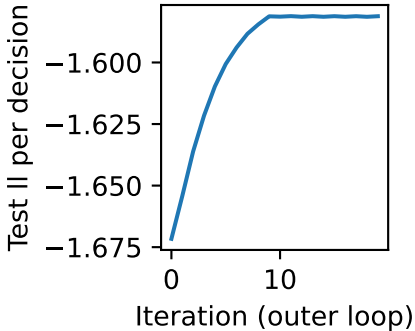

Supplement: supplementary_material [file attachment]

Final: -1.3717

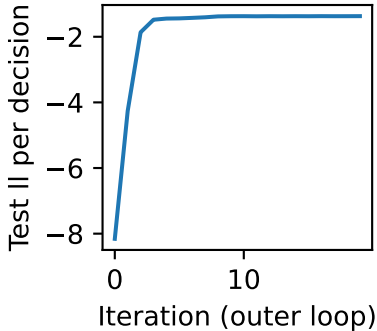

Supplement: supplementary_material [file attachment]

Final: -2.7561

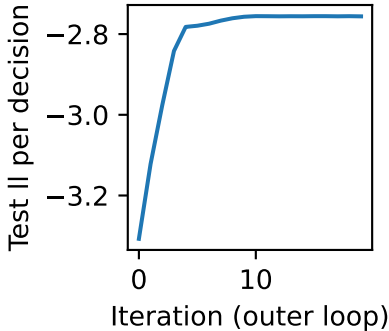

Supplement: supplementary_material [file attachment]

Loss for weight

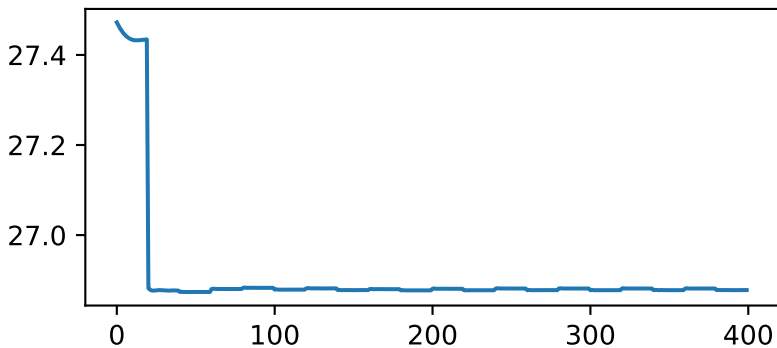

Loss for maps

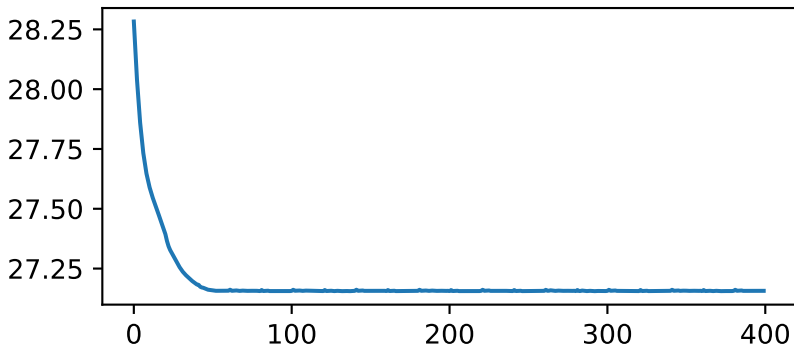

Supplement: supplementary_material [file attachment]

Loss for weight

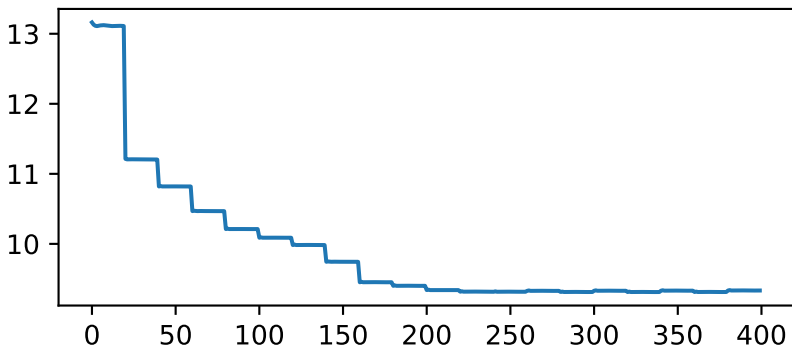

Loss for maps

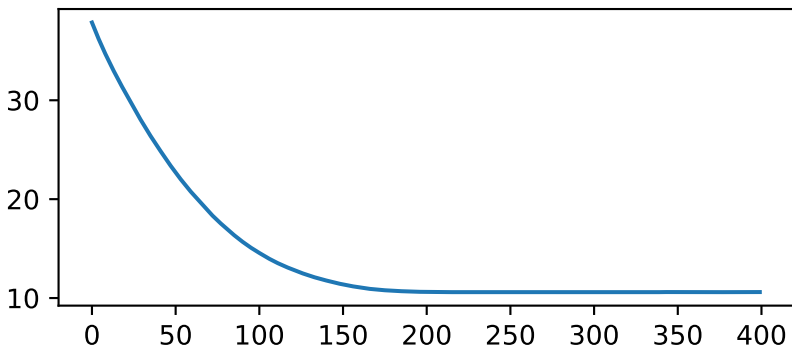

Supplement: supplementary_material [file attachment]

Loss for weight

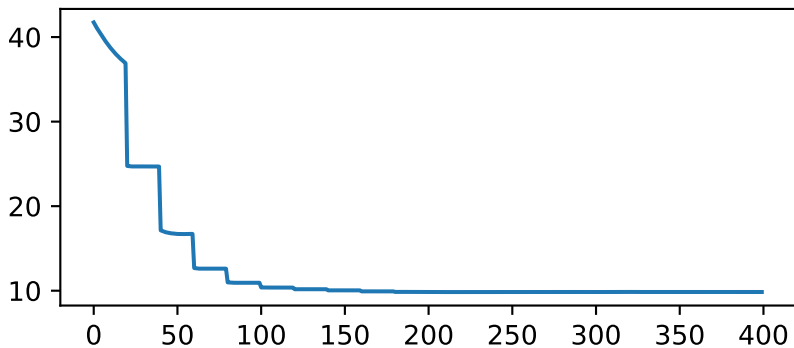

Loss for maps

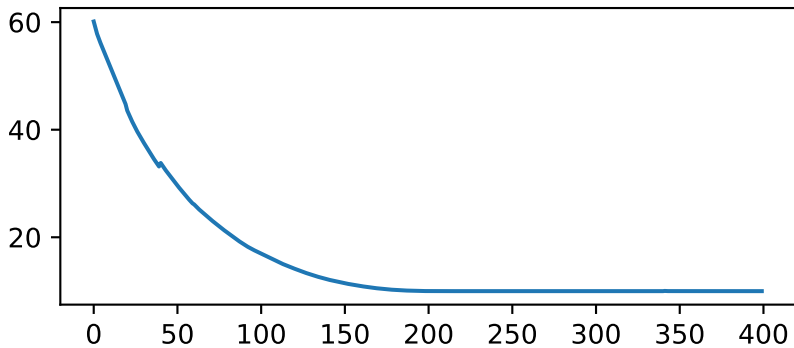

Supplement: supplementary_material [file attachment]

Final: -1.5815

Test II per decision

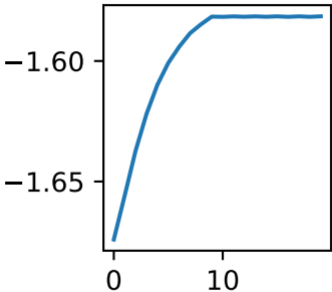

Iteration (outer loop)

Supplement: supplementary_material [file attachment]

Final II: -2.56

Test II per decision

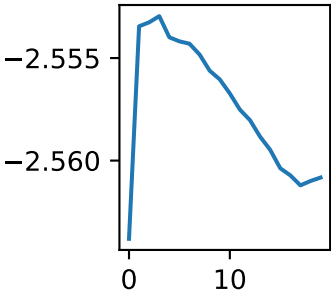

Iteration (outer loop)

Supplement: supplementary_material [file attachment]

Final: -3.1294

Test II per decision

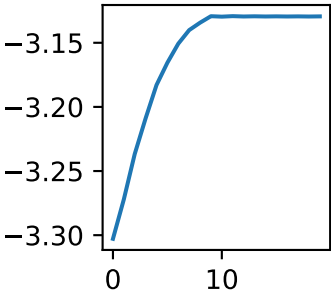

Iteration (outer loop)

Supplement: supplementary_material [file attachment]

Loss for weight

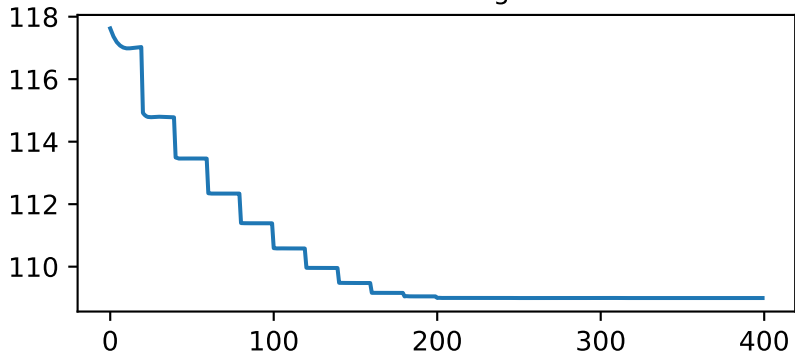

Loss for maps

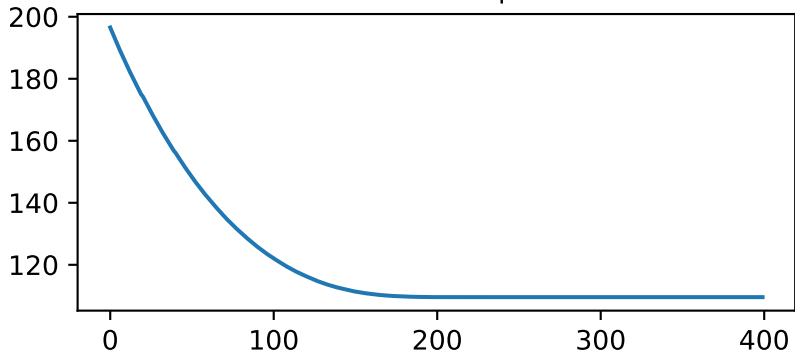

Supplement: supplementary_material [file attachment]

Loss for weight

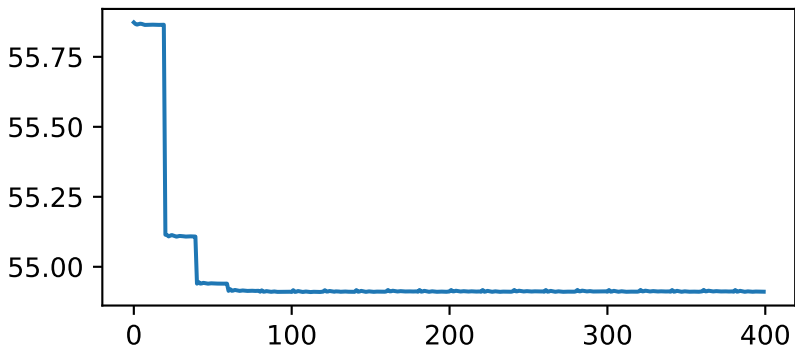

Loss for maps

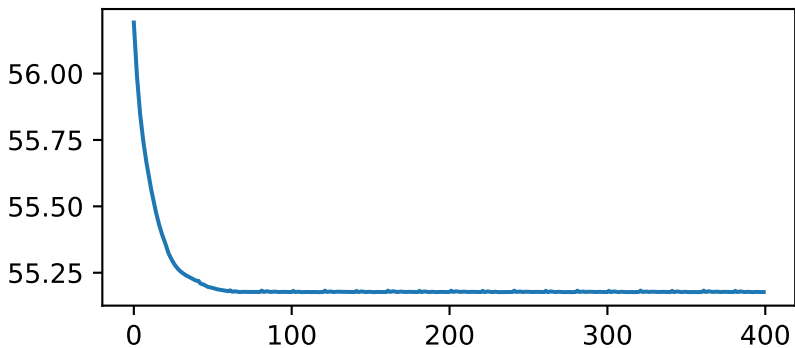

Supplement: supplementary_material [file attachment]

Loss for weight

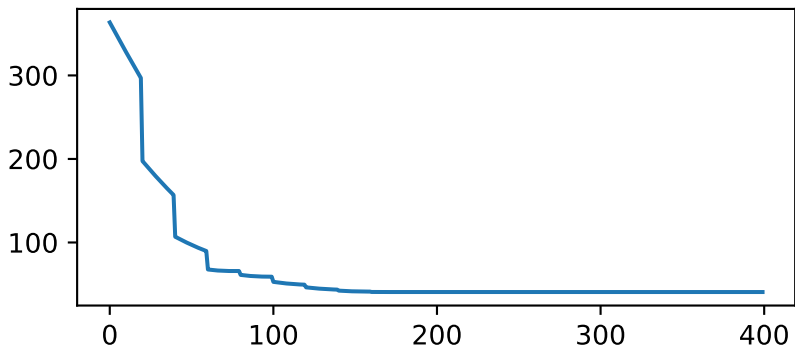

Loss for maps

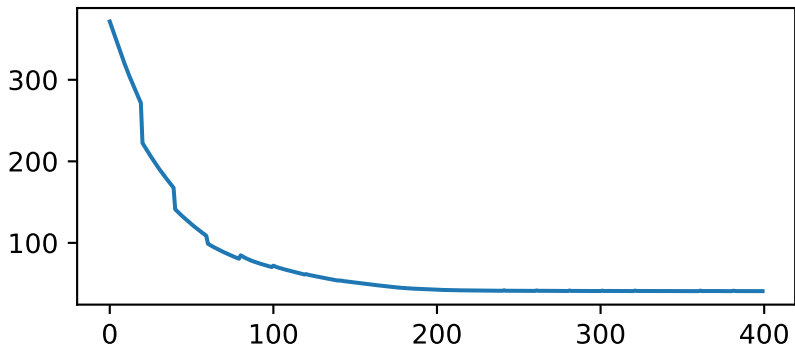

Supplement: supplementary_material [file attachment]

Final: -1.5737

Test II per decision

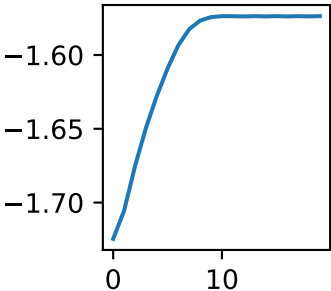

Iteration (outer loop)

Supplement: supplementary_material [file attachment]

Final: -1.8002

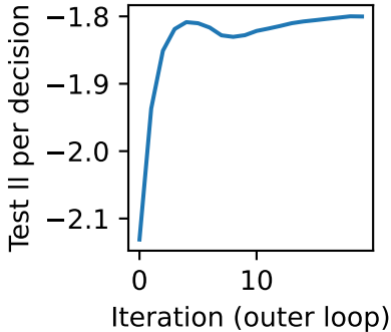

Supplement: supplementary_material [file attachment]

Final ll: -2.55

Test ll per decision

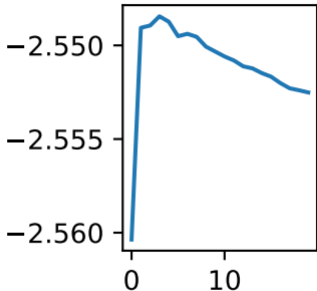

Iteration (outer loop)

Supplement: supplementary_material [file attachment]

Final: -3.1689

Test II per decision

-3.20  
-3.25  
-3.30

0

10

Iteration (outer loop)

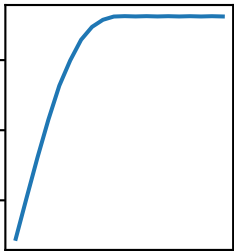

Supplement: supplementary_material [file attachment]

Final II: -0.58

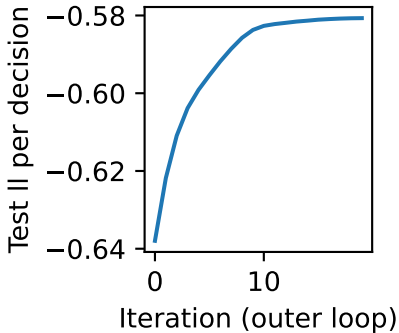

Supplement: supplementary_material [file attachment]

Final: -1.9738

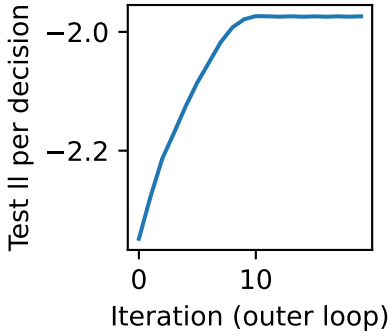

Supplement: supplementary_material [file attachment]

Final: -1.5826

Test II per decision

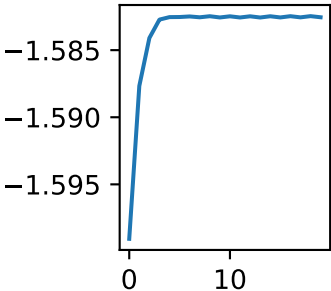

Iteration (outer loop)

Supplement: supplementary_material [file attachment]

Loss for weight

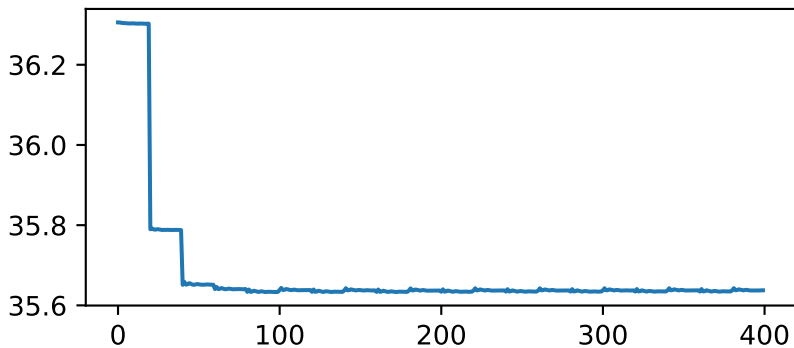

Loss for maps

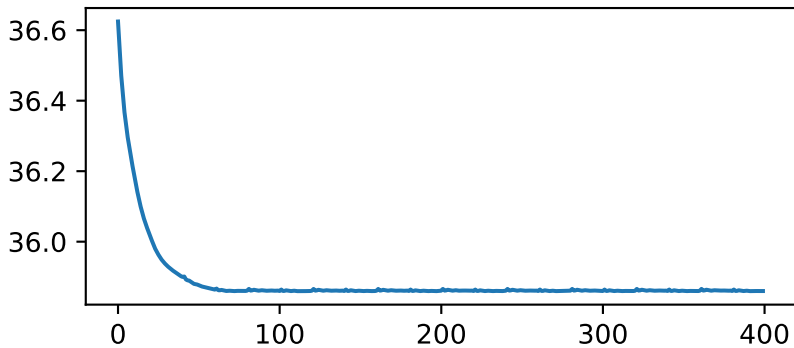

Supplement: supplementary_material [file attachment]

Loss for weight

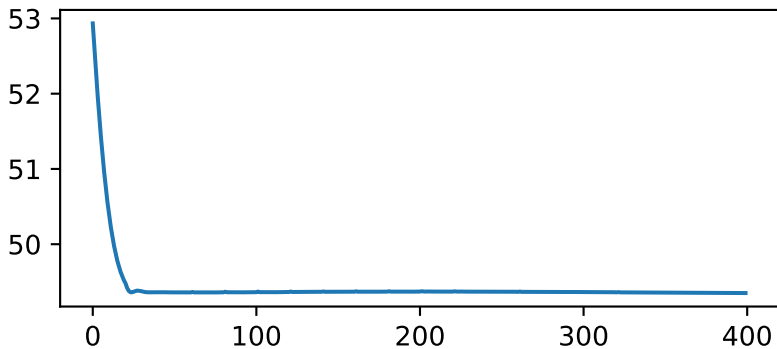

Loss for maps

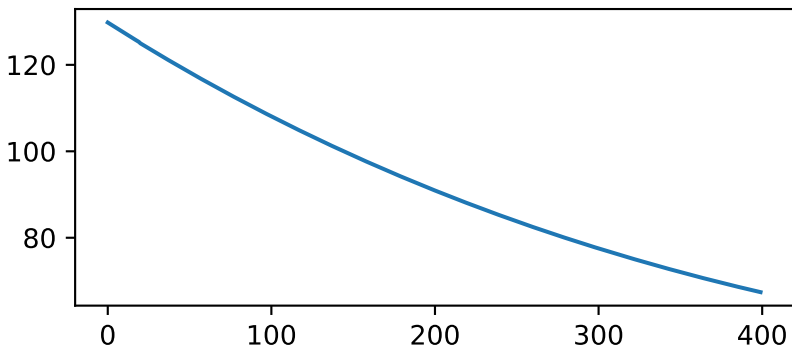

Supplement: supplementary_material [file attachment]

Loss for weight

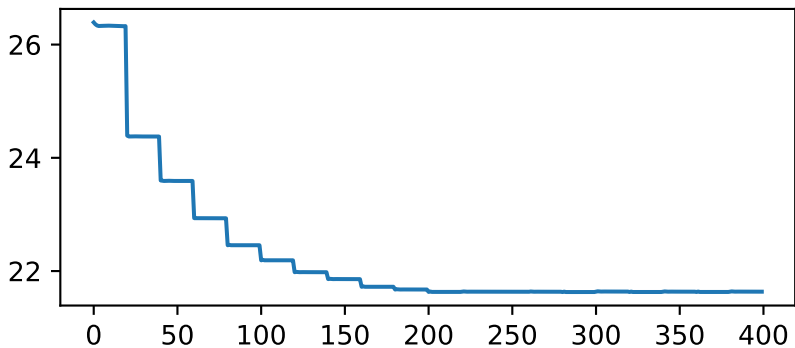

Loss for maps

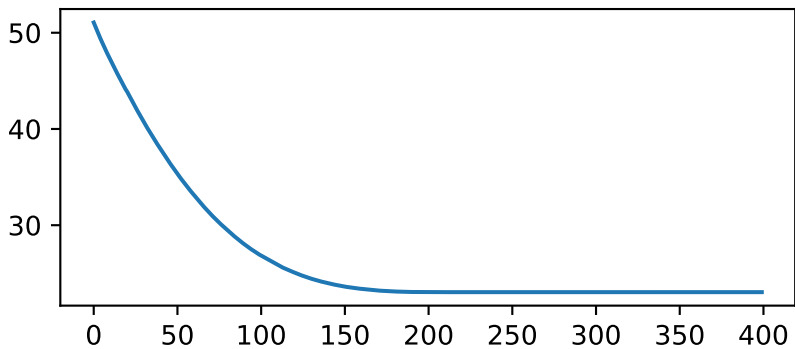

Supplement: supplementary_material [file attachment]

A

actual rewards

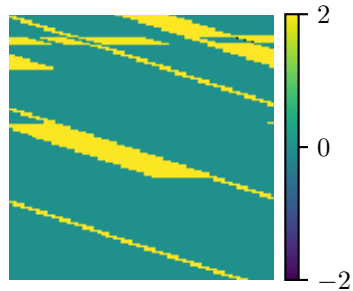

B

agent 1

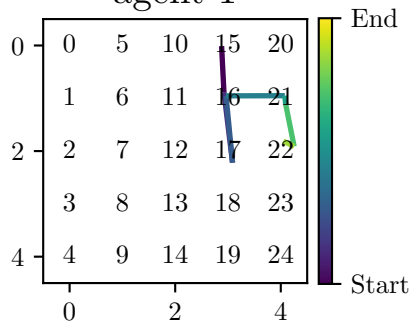

C

agent 2

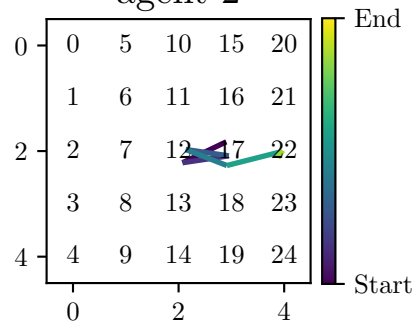

D

 $m(s_1) : (\alpha = 1.01)$ 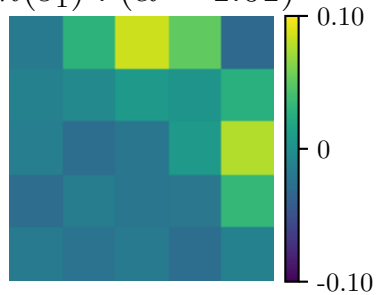

E

 $n(s_2) : (\alpha = 1.01)$ 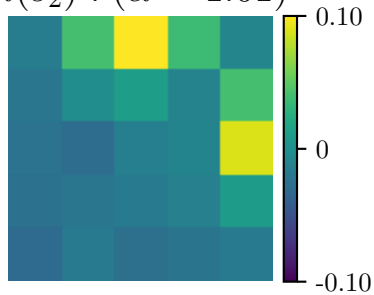

F

 $\phi(s_1, s_2) : (\alpha = 1.01)$ 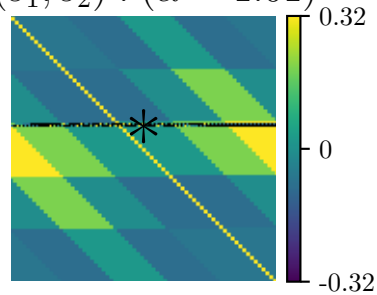

Supplement: supplementary_material [file attachment]

Loss for weight

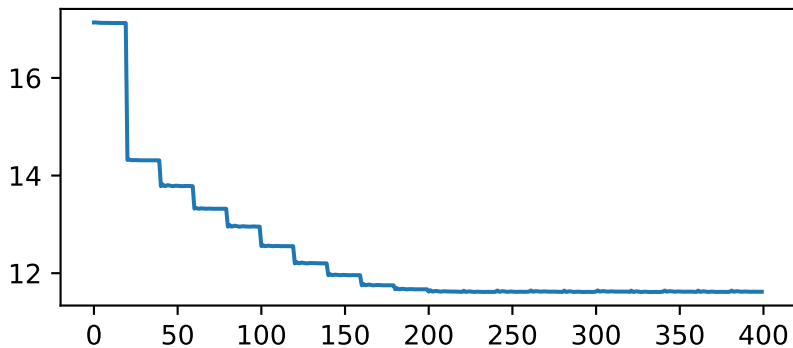

Loss for maps

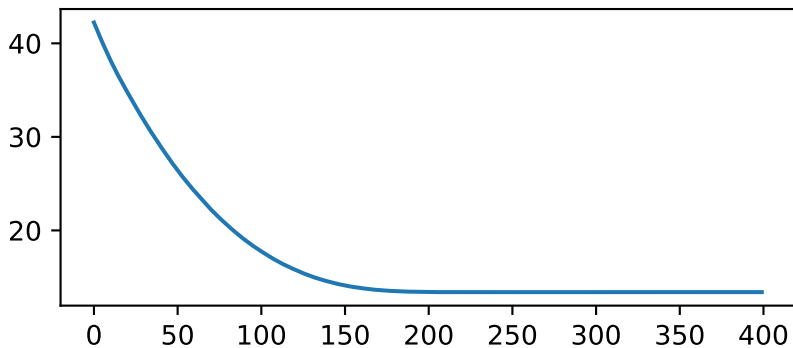

Supplement: supplementary_material [file attachment]

Loss for weight

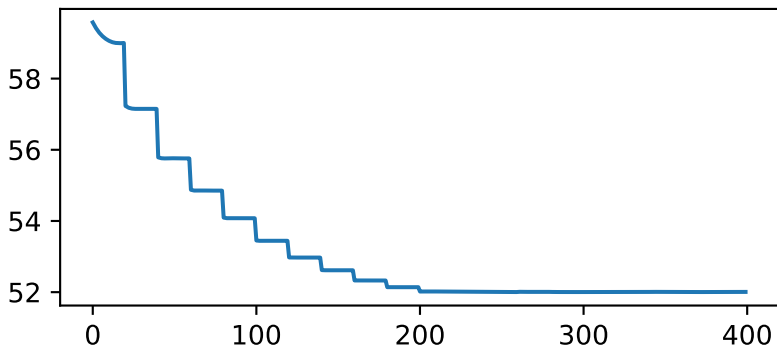

Loss for maps

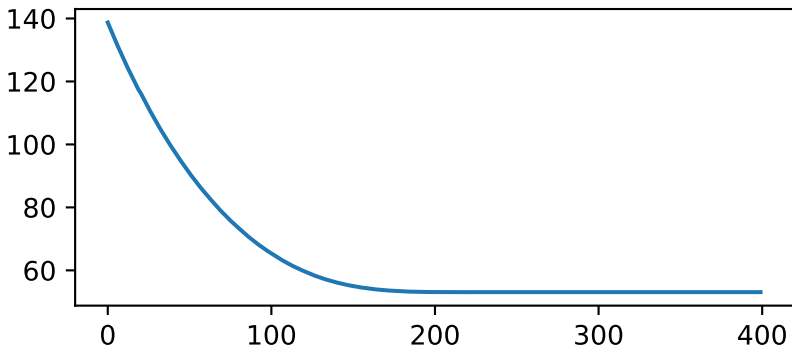

Supplement: supplementary_material [file attachment]

Final: -2.0156

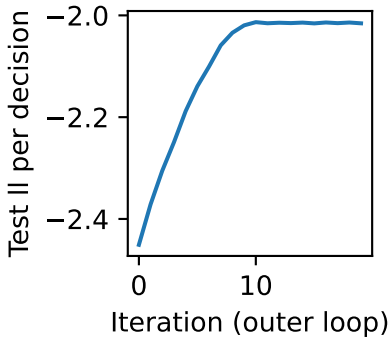

Supplement: supplementary_material [file attachment]

Loss for weight

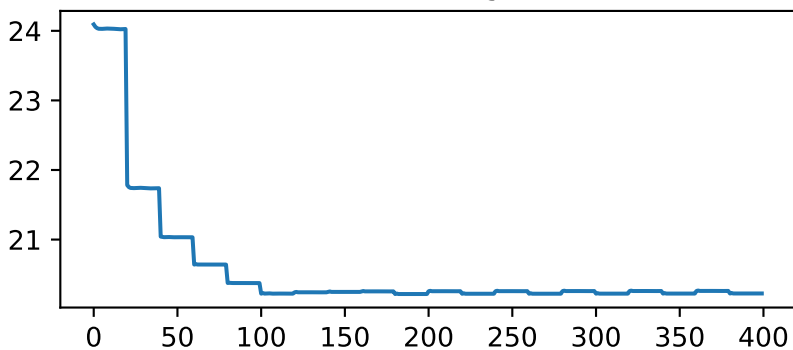

Loss for maps

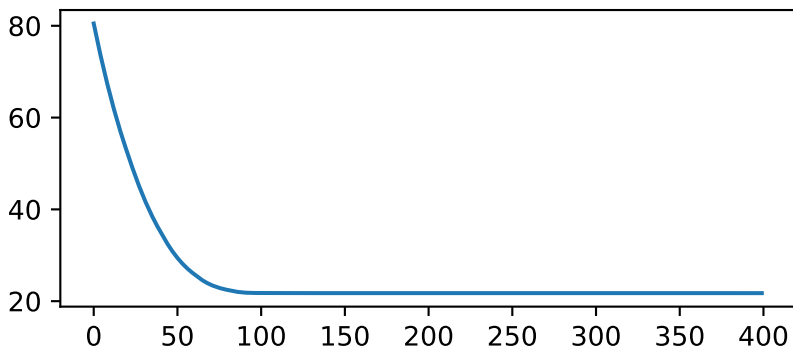

Supplement: supplementary_material [file attachment]

Final: -3.1466

Test II per decision

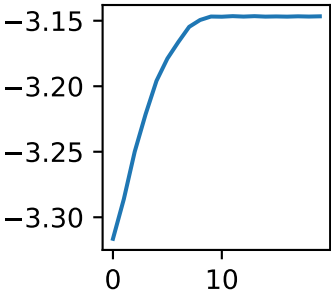

Iteration (outer loop)

Supplement: supplementary_material [file attachment]

Final: -1.5725

Test II per decision

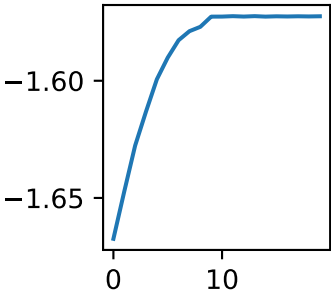

Iteration (outer loop)

Supplement: supplementary_material [file attachment]

Final: -2.1955

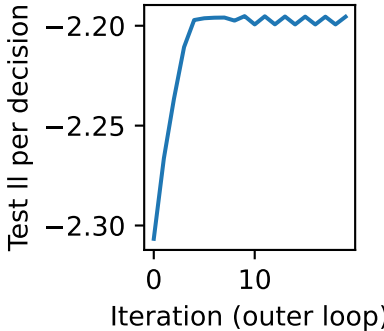

Supplement: supplementary_material [file attachment]

Final: -1.5828

Test II per decision

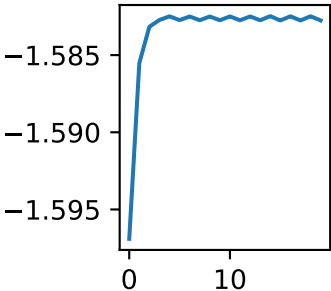

Iteration (outer loop)

Supplement: supplementary_material [file attachment]

Loss for weight

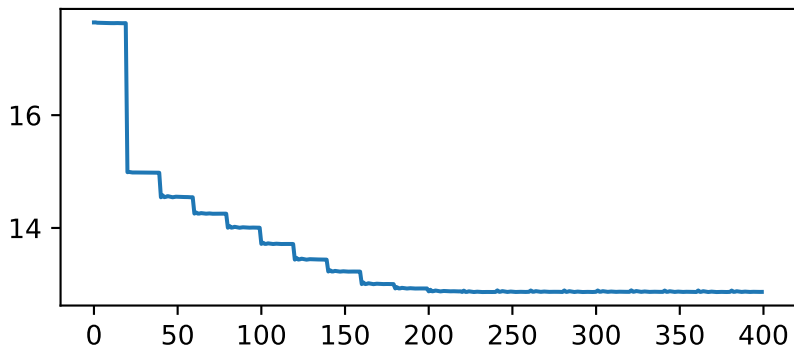

Loss for maps

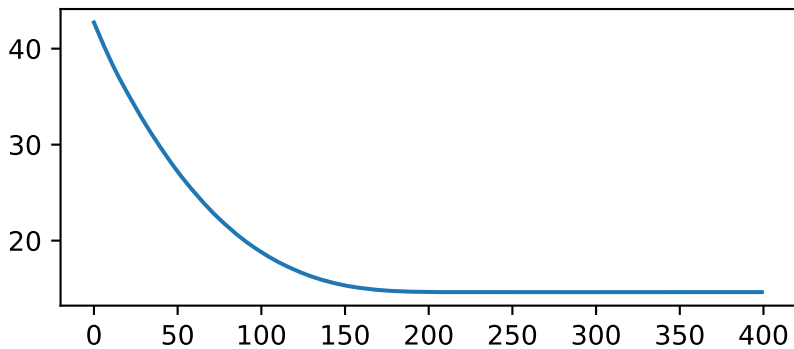

Supplement: supplementary_material [file attachment]

Loss for weight

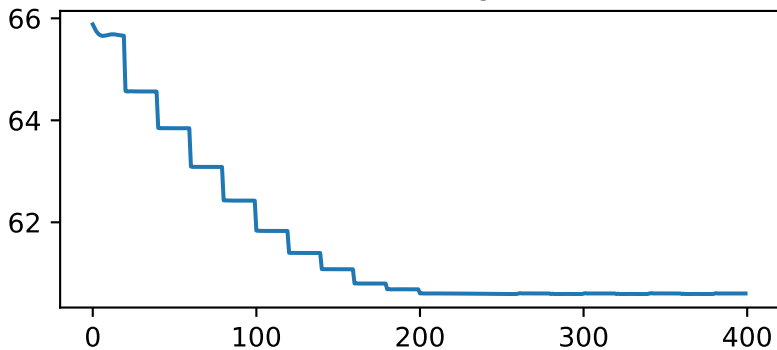

Loss for maps

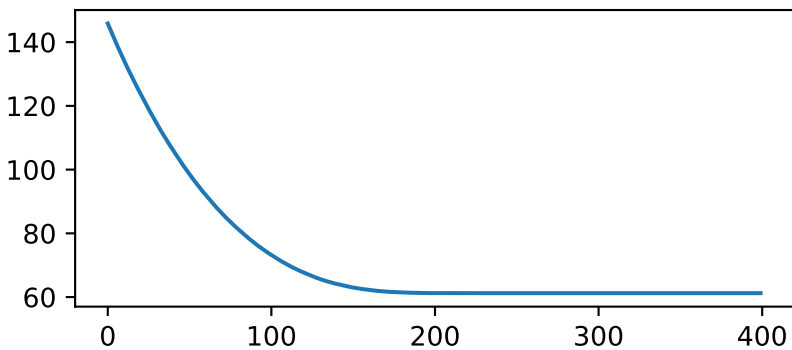

Supplement: supplementary_material [file attachment]

Final II: -0.64

Test II per decision

-0.65  
-0.66  
-0.67

0

10

Iteration (outer loop)

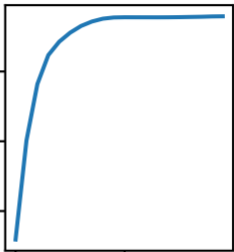

Supplement: supplementary_material [file attachment]

Loss for weight

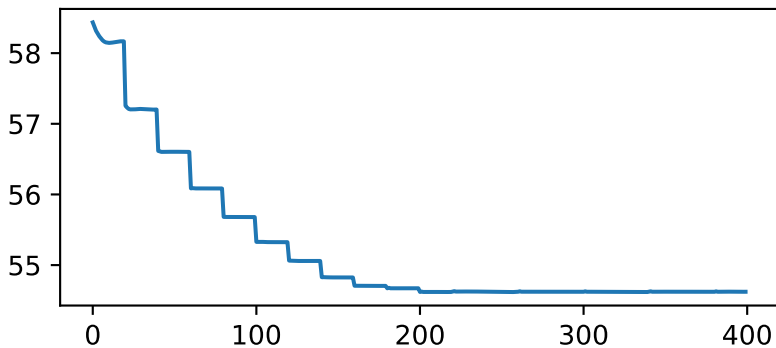

Loss for maps

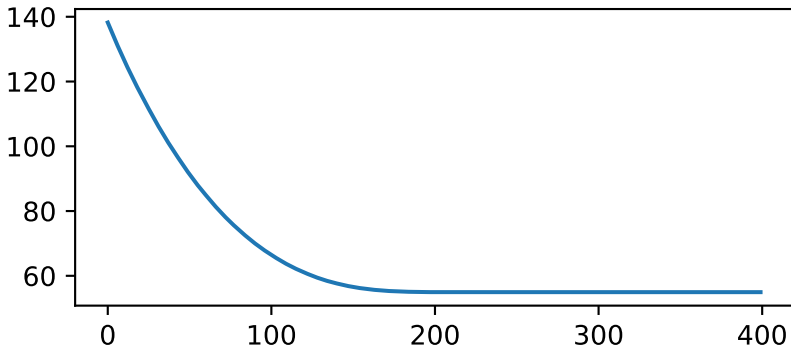

Supplement: supplementary_material [file attachment]

Loss for weight

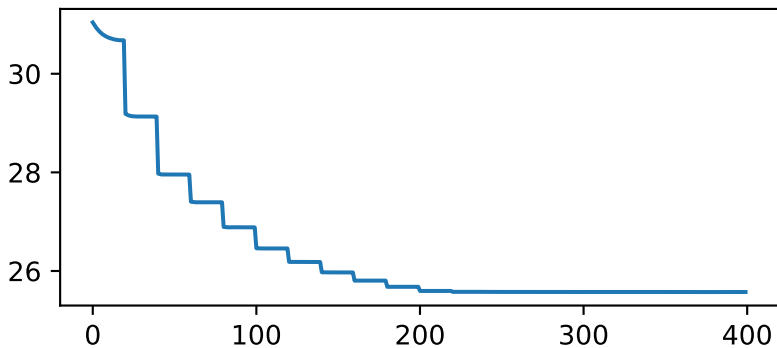

Loss for maps

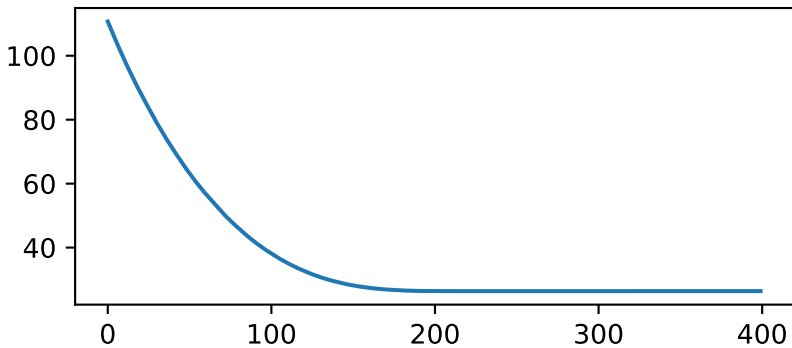

Supplement: supplementary_material [file attachment]

Final: -3.0475

Test II per decision

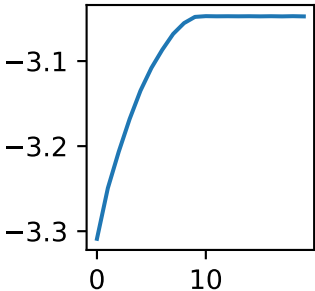

Iteration (outer loop)

Supplement: supplementary_material [file attachment]

Loss for weight

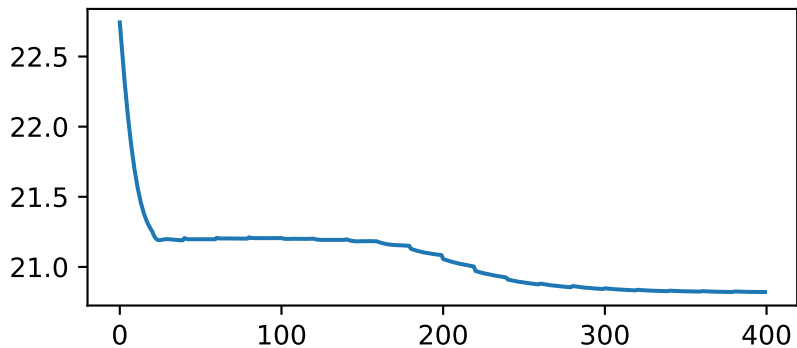

Loss for maps

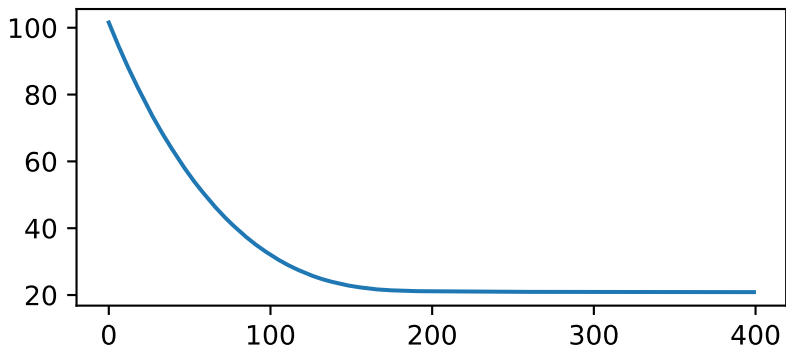

Supplement: supplementary_material [file attachment]

Final: -3.1732

Test II per decision

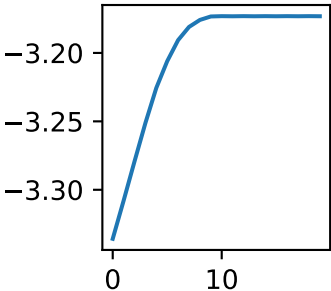

Iteration (outer loop)

Supplement: supplementary_material [file attachment]

Final: -2.1845

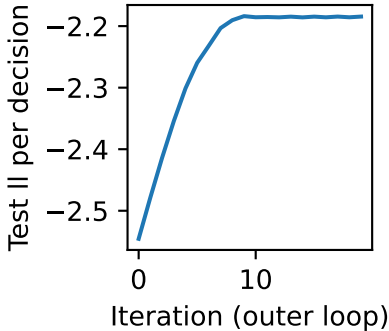

Supplement: supplementary_material [file attachment]

Loss for weight

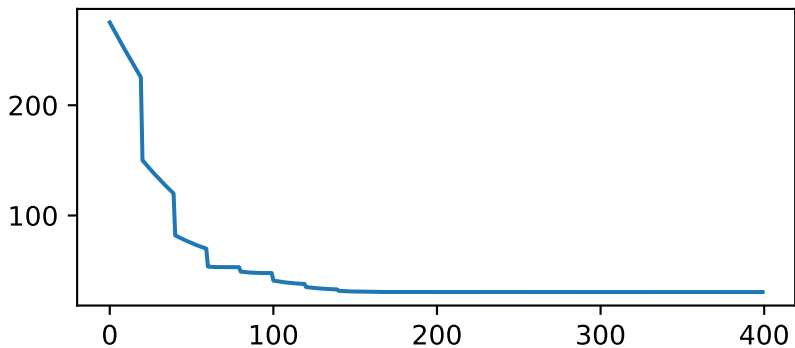

Loss for maps

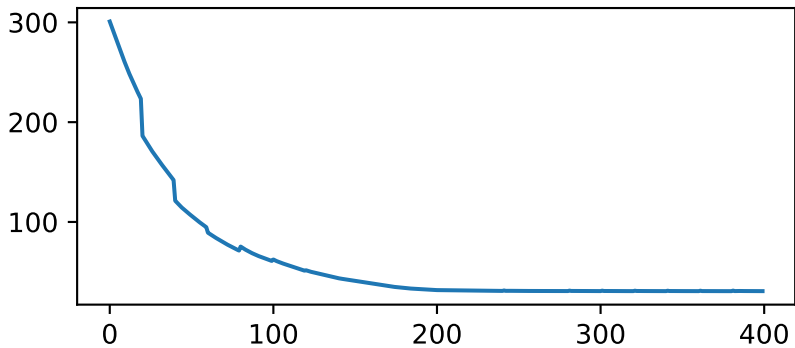

Supplement: supplementary_material [file attachment]

Final: -1.5780

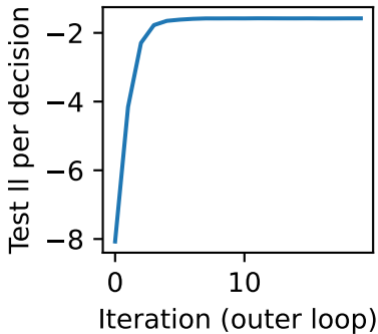

Supplement: supplementary_material [file attachment]

Final: -2.5398

Test II per decision

-2.6  
-2.7  
-2.8

0 10

Iteration (outer loop)

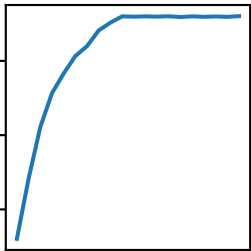

Supplement: supplementary_material [file attachment]

Loss for weight

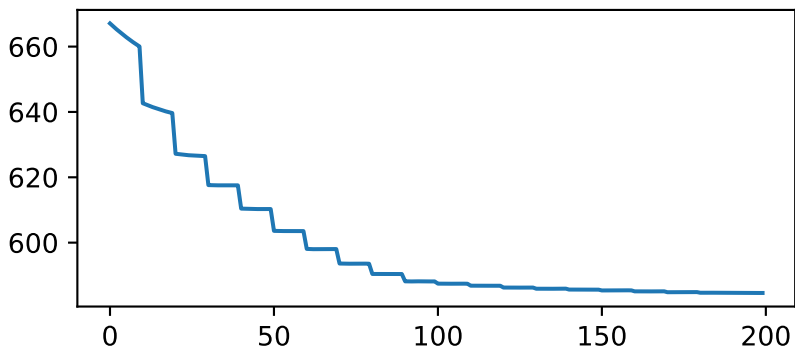

Loss for maps

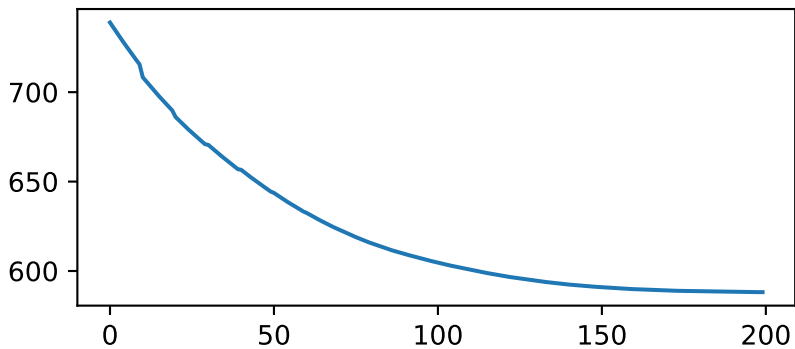

Supplement: supplementary_material [file attachment]

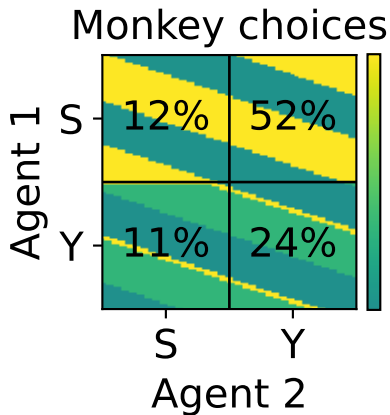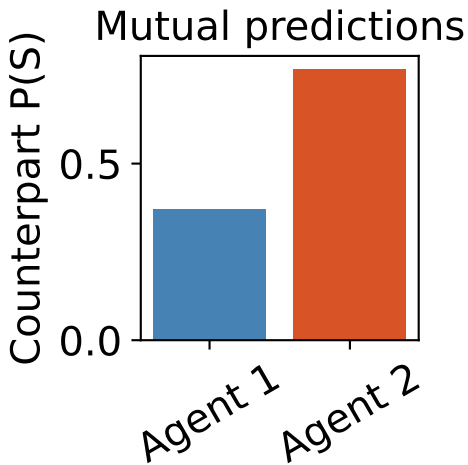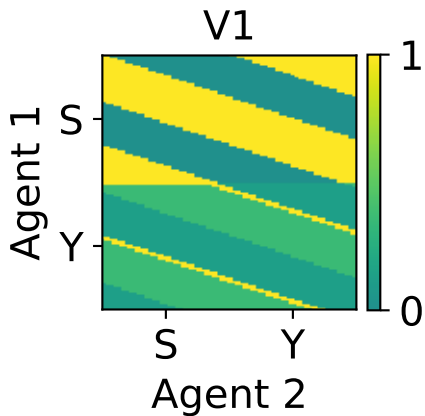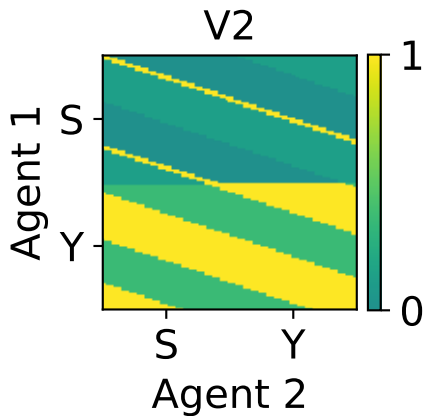

Supplement: supplementary_material [file attachment]

Final: -1.5196

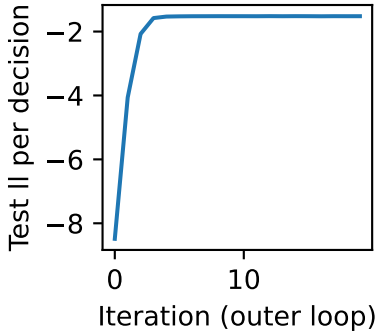

Supplement: supplementary_material [file attachment]

Loss for weight

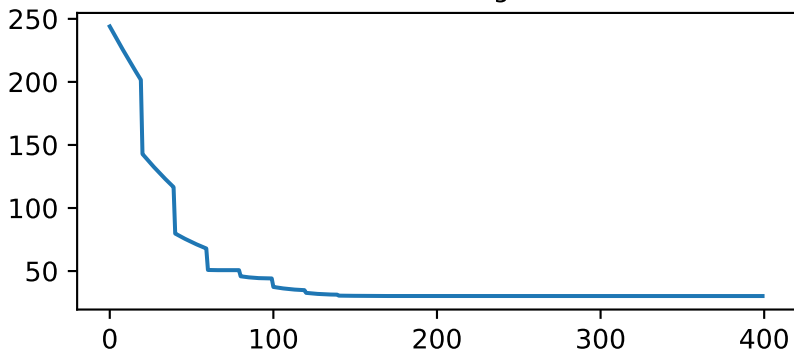

Loss for maps

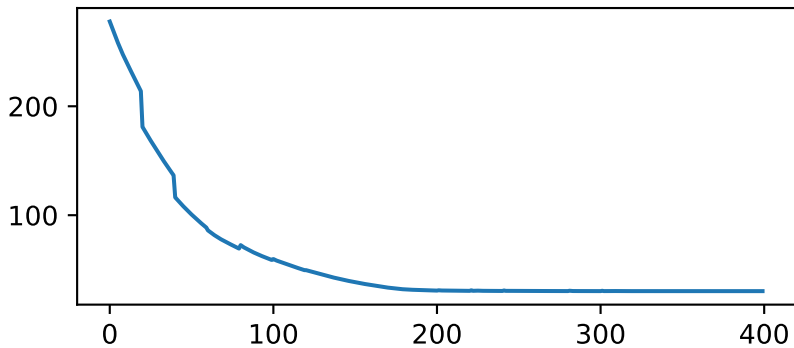

Supplement: supplementary_material [file attachment]

Final: -2.1481

Test II per decision

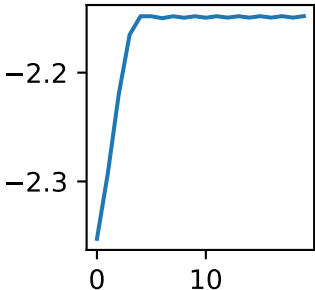

Iteration (outer loop)

Supplement: supplementary_material [file attachment]

Loss for weight

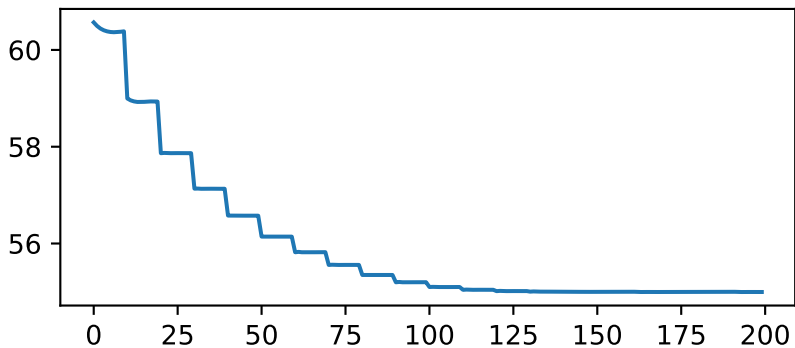

Loss for maps

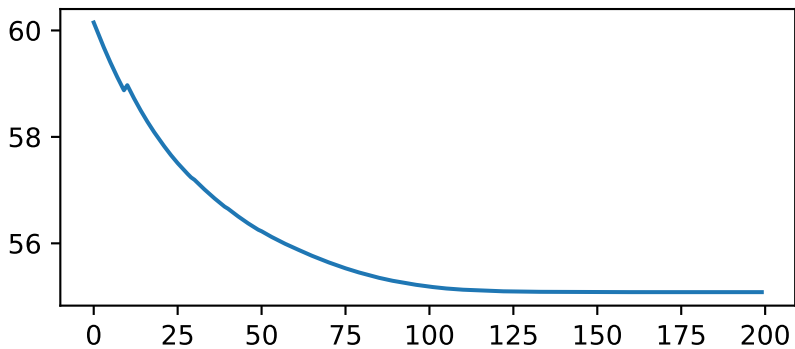

Supplement: supplementary_material [file attachment]

Loss for weight

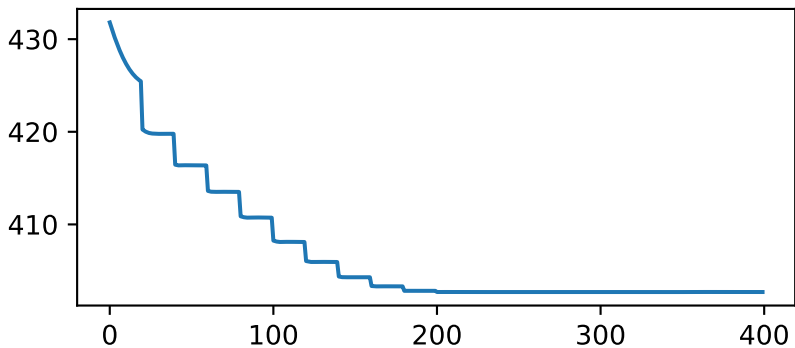

Loss for maps

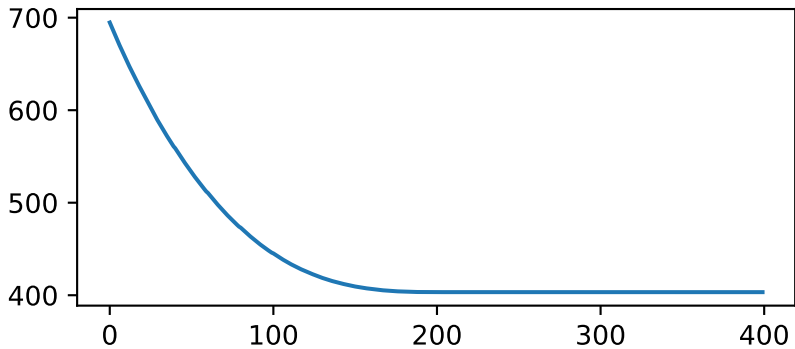

Supplement: supplementary_material [file attachment]

Final: -1.5920

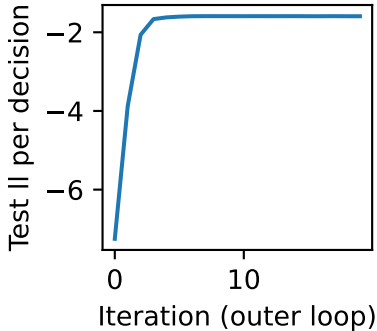

Supplement: supplementary_material [file attachment]

Loss for weight

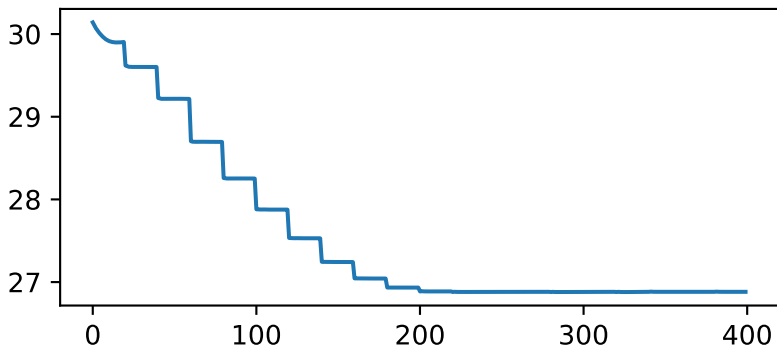

Loss for maps

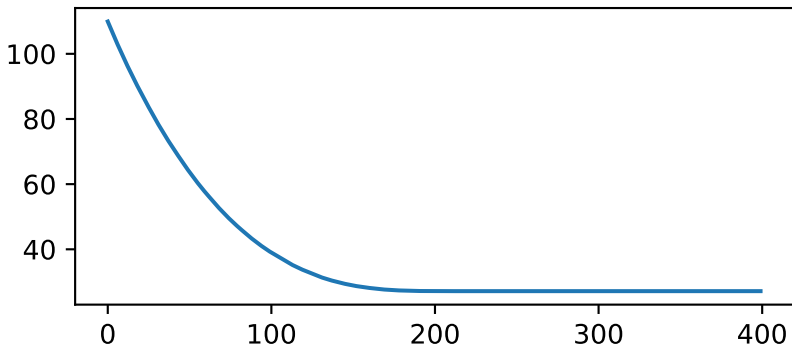

Supplement: supplementary_material [file attachment]

Final: -1.3120

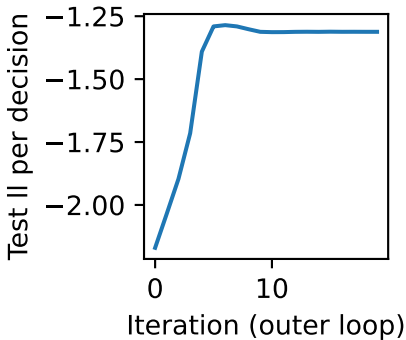

Supplement: supplementary_material [file attachment]

Loss for weight

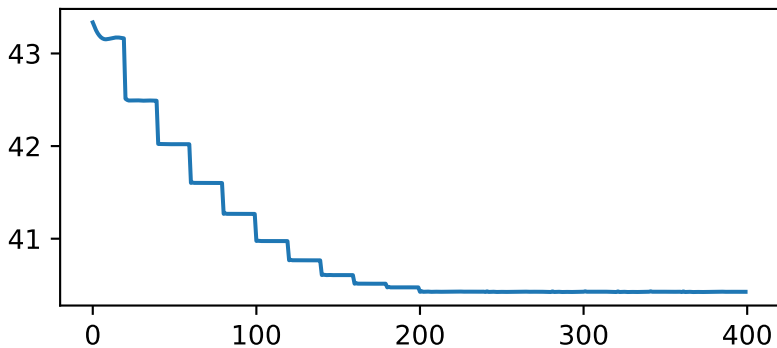

Loss for maps

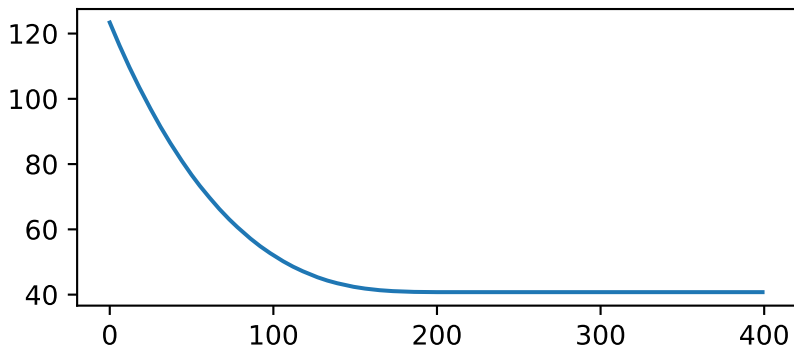

Supplement: supplementary_material [file attachment]

Final ll: -116.23

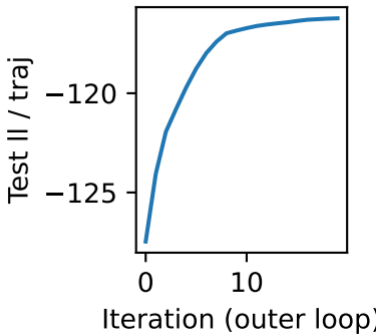

Supplement: supplementary_material [file attachment]

Loss for weight

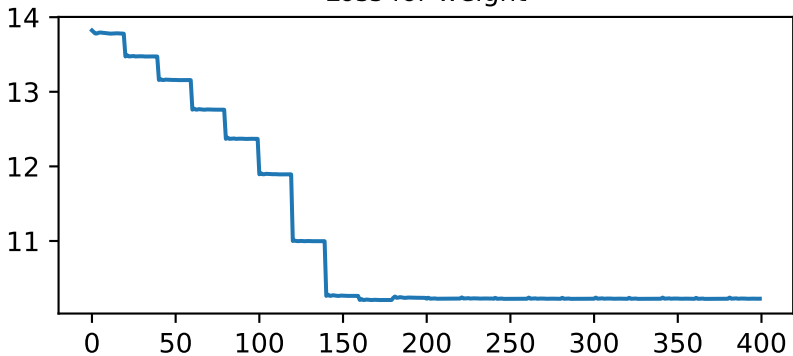

Loss for maps

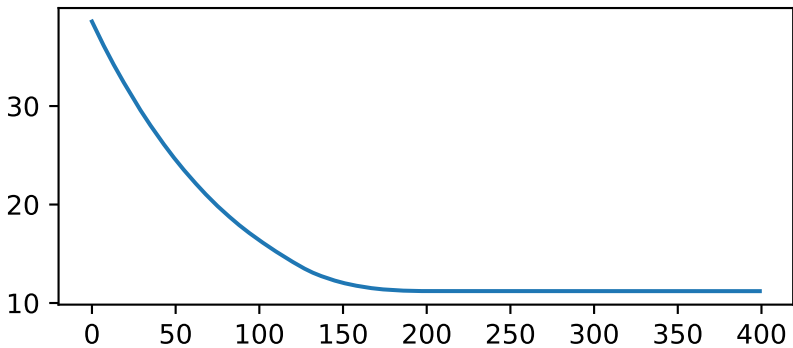

Supplement: supplementary_material [file attachment]

Final ll: -128.06

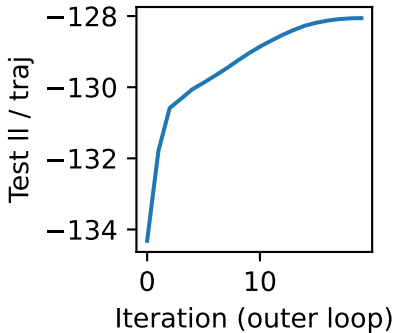

Supplement: supplementary_material [file attachment]

Loss for weight

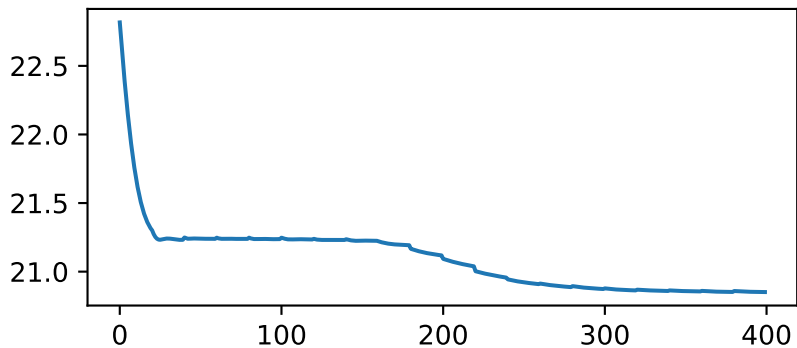

Loss for maps

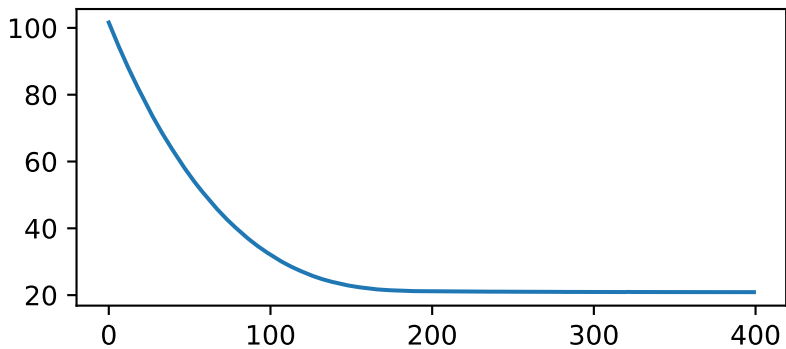

Supplement: supplementary_material [file attachment]

Final: -1.0873

Test II per decision

-1.2

-1.4

0

10

Iteration (outer loop)

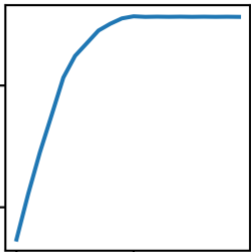

Supplement: supplementary_material [file attachment]

Final: -2.9667

Test II per decision

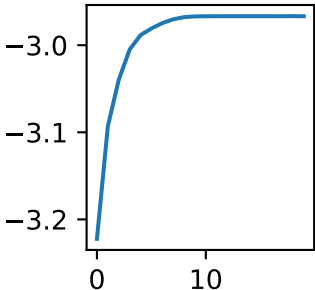

Iteration (outer loop)

Supplement: supplementary_material [file attachment]

Final: -1.2020

Test II per decision

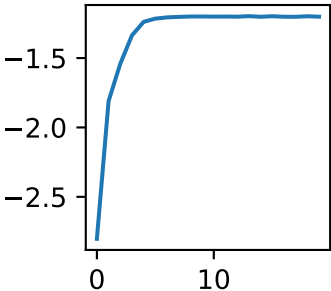

Iteration (outer loop)

Supplement: supplementary_material [file attachment]

Final II: -0.58

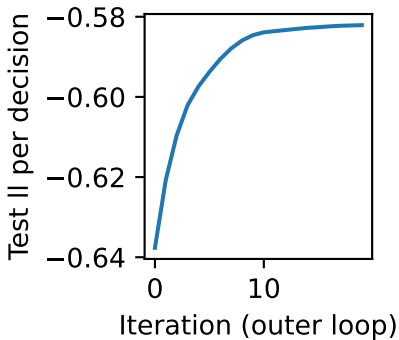

Supplement: supplementary_material [file attachment]

Loss for weight

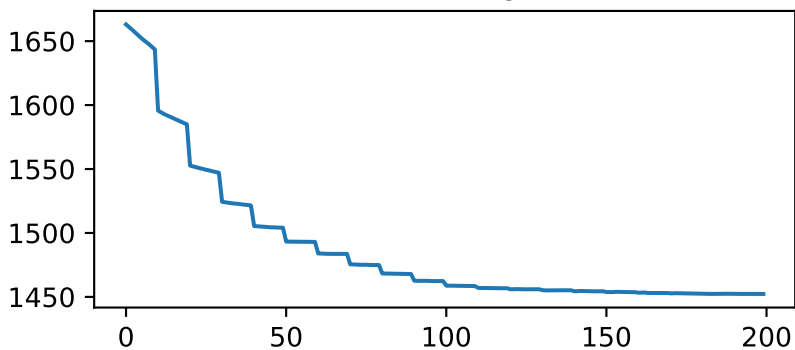

Loss for maps

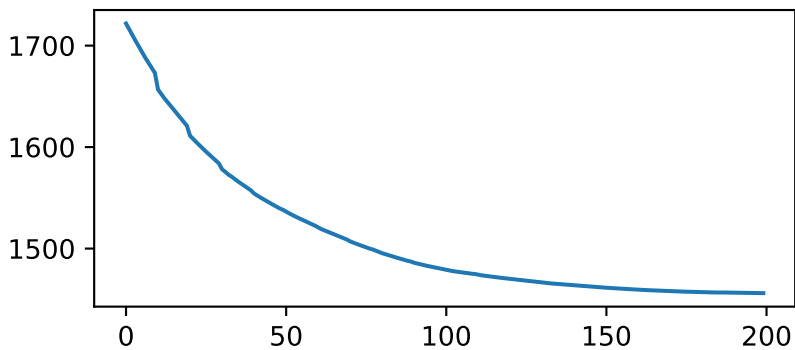

Supplement: supplementary_material [file attachment]

Final II: -0.58

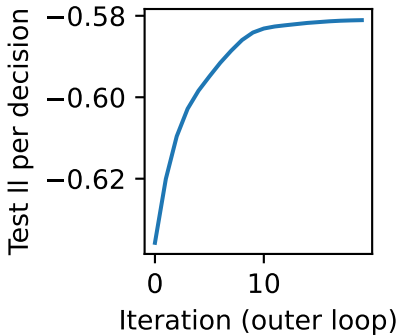

Supplement: supplementary_material [file attachment]

Loss for weight

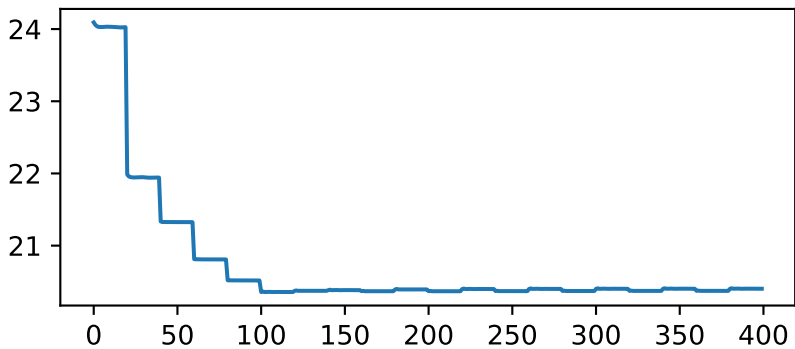

Loss for maps

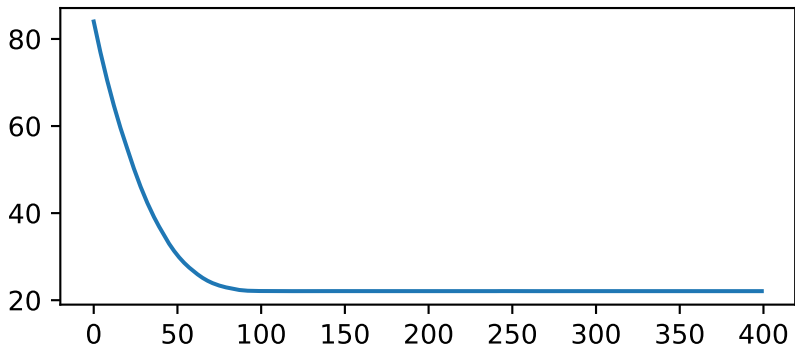

Supplement: supplementary_material [file attachment]

Loss for weight

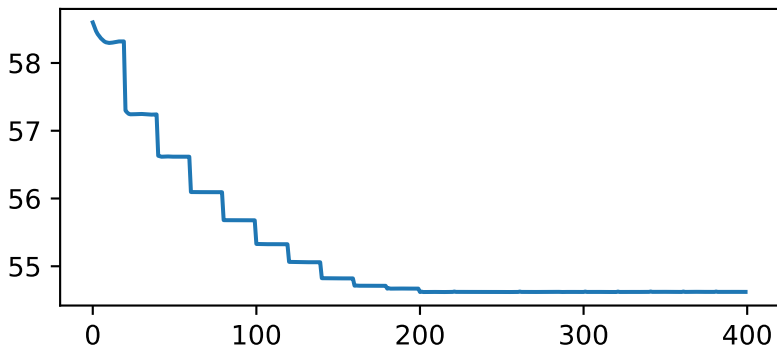

Loss for maps

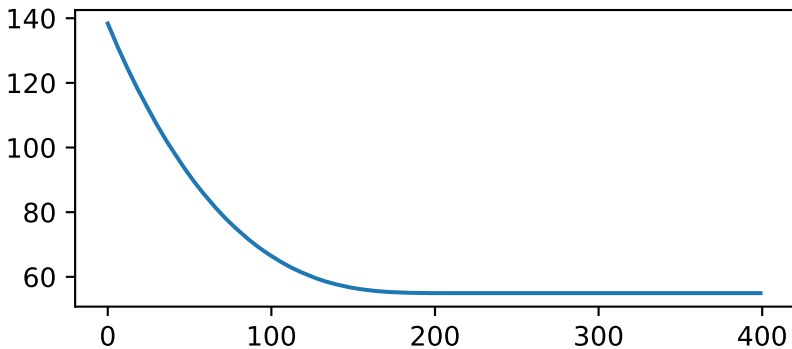

Supplement: supplementary_material [file attachment]

Loss for weight

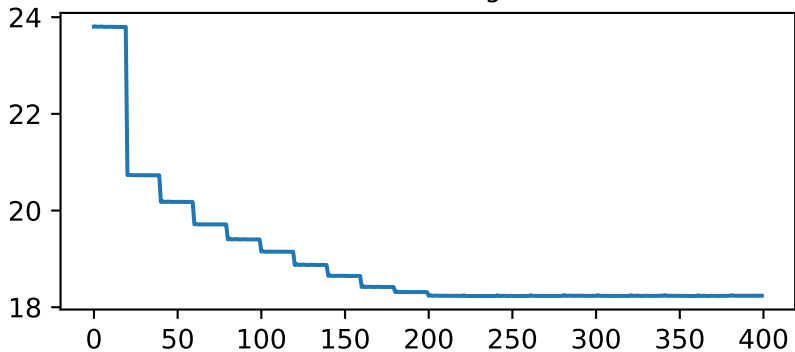

Loss for maps

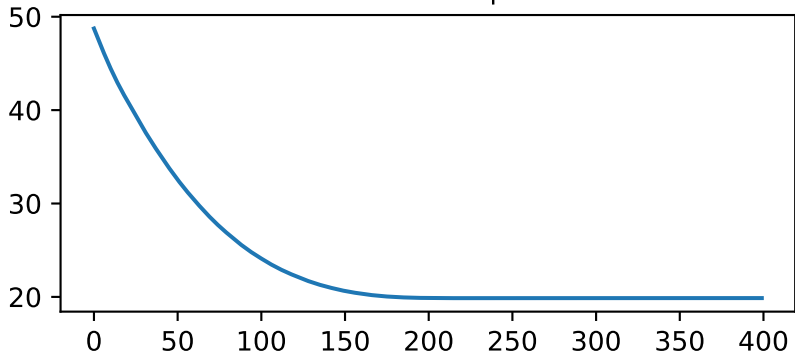

Supplement: supplementary_material [file attachment]

Loss for weight

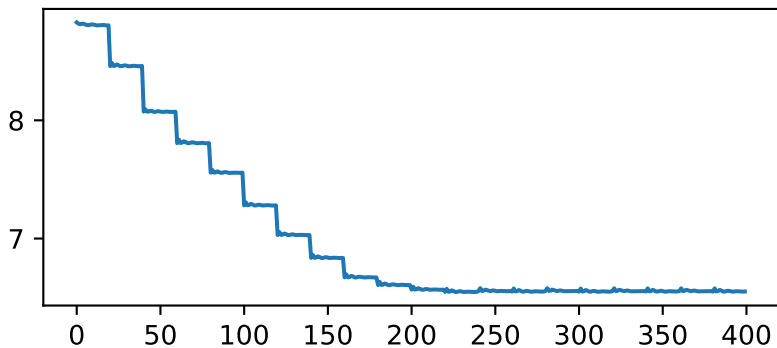

Loss for maps

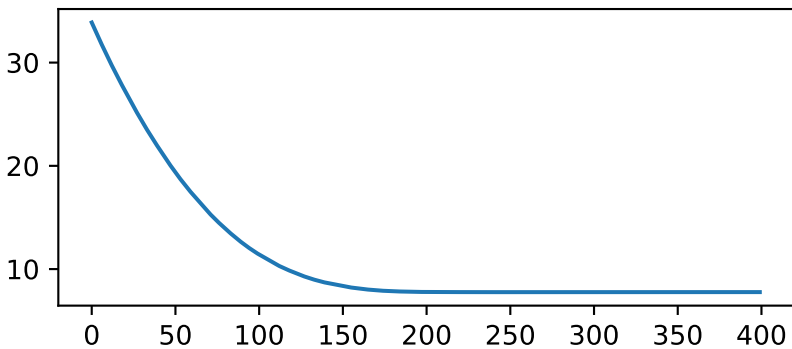

Supplement: supplementary_material [file attachment]

Loss for weight

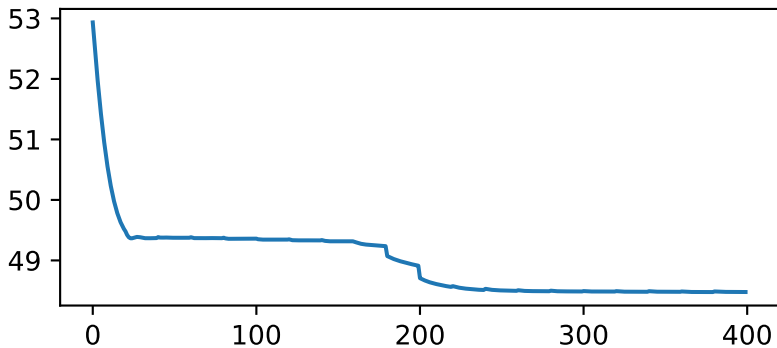

Loss for maps

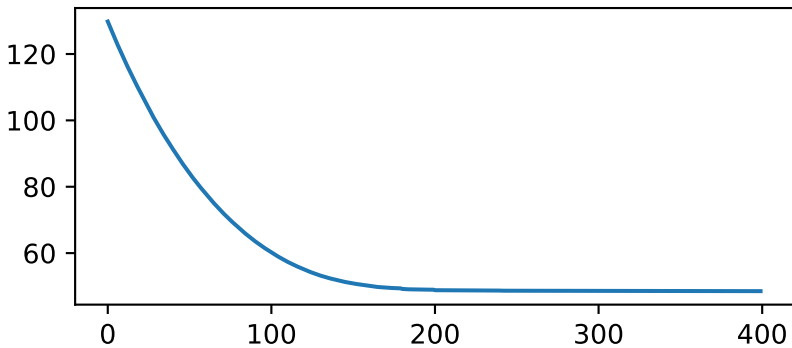

Supplement: supplementary_material [file attachment]

Loss for weight

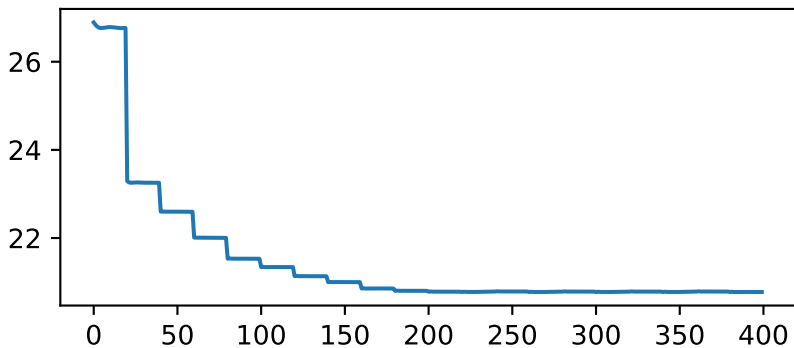

Loss for maps

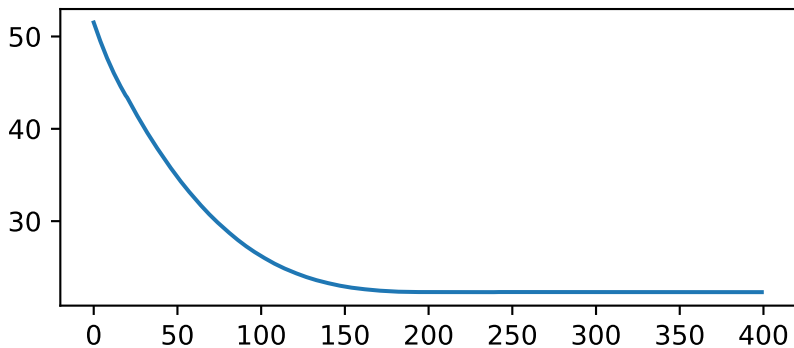

Supplement: supplementary_material [file attachment]

Loss for weight

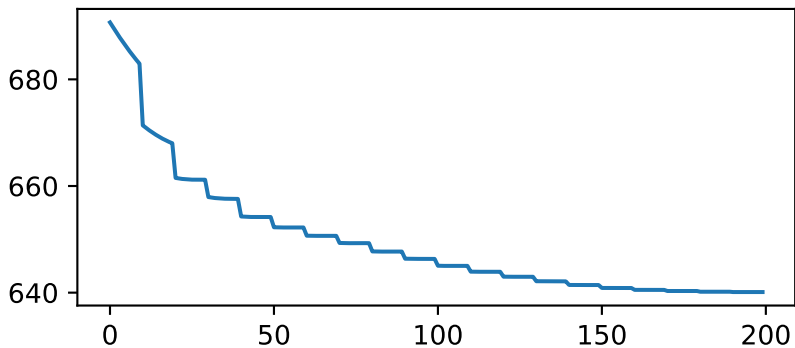

Loss for maps

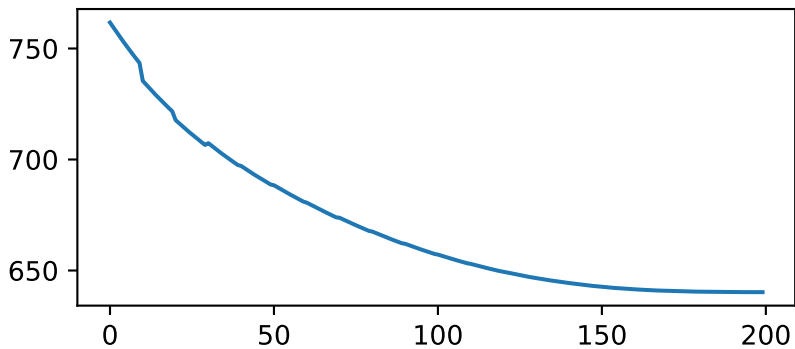

Supplement: supplementary_material [file attachment]
