# Supplementary material (part 3 of 3)
Source: ML conference proceedings conference paper supplement (https://openreview.net/forum?id=KiDGtYCPcv)

Final: -1.5848

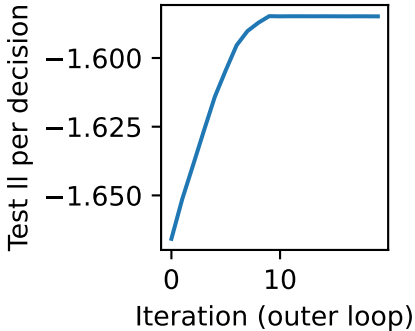

Supplement: supplementary_material [file attachment]

Loss for weight

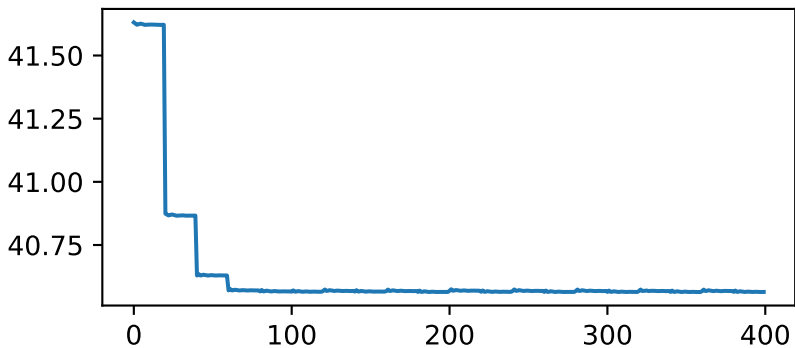

Loss for maps

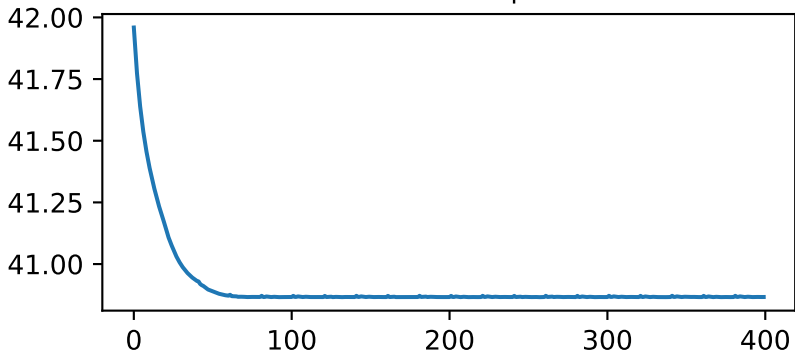

Supplement: supplementary_material [file attachment]

Loss for weight

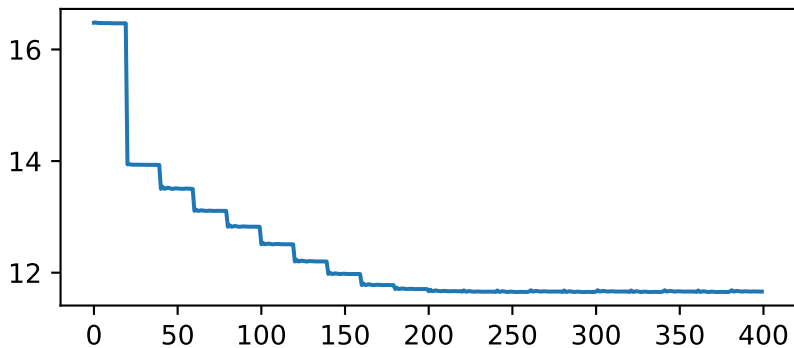

Loss for maps

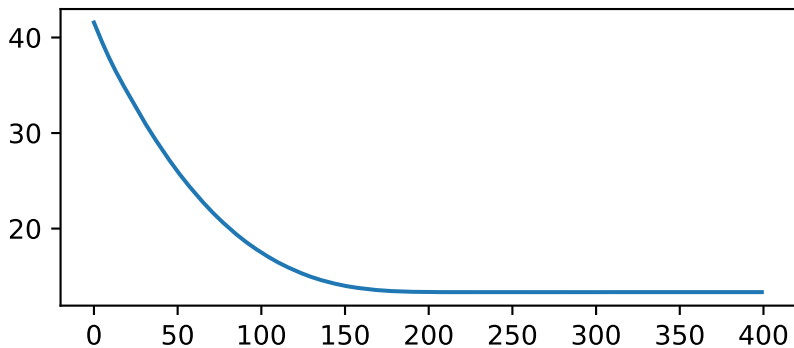

Supplement: supplementary_material [file attachment]

Final: -1.1549

Test II per decision

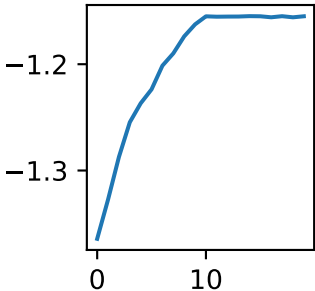

Iteration (outer loop)

Supplement: supplementary_material [file attachment]

Loss for weight

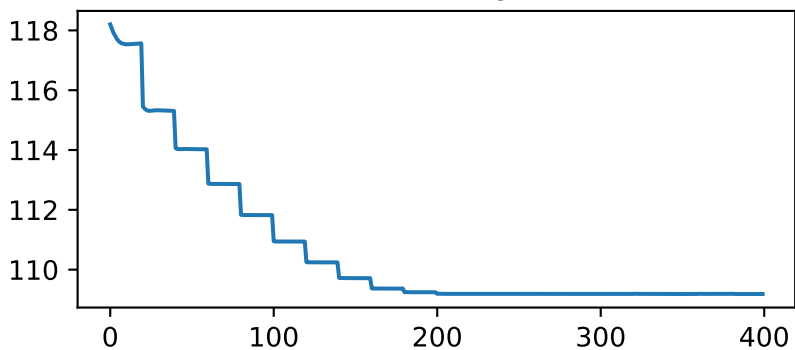

Loss for maps

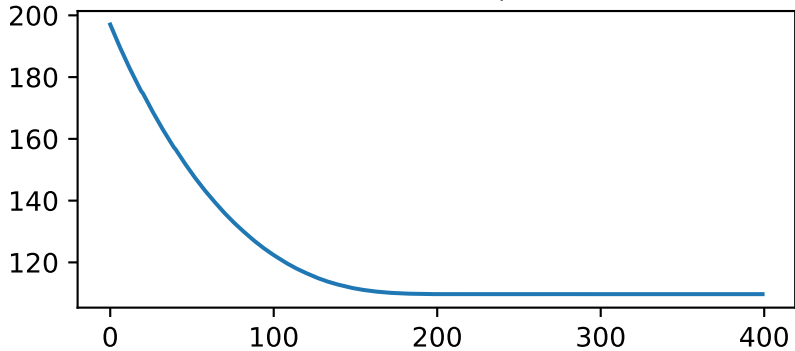

Supplement: supplementary_material [file attachment]

Loss for weight

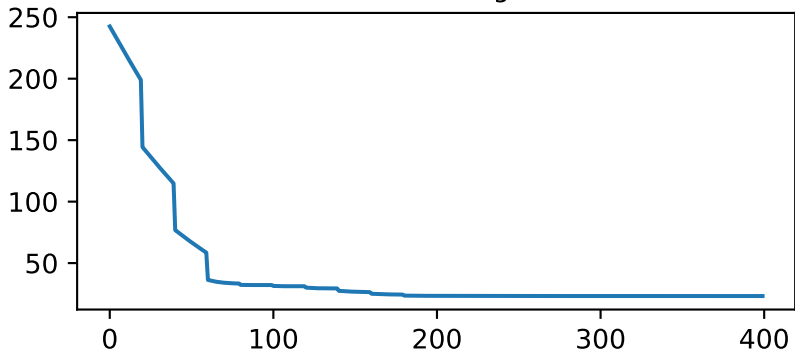

Loss for maps

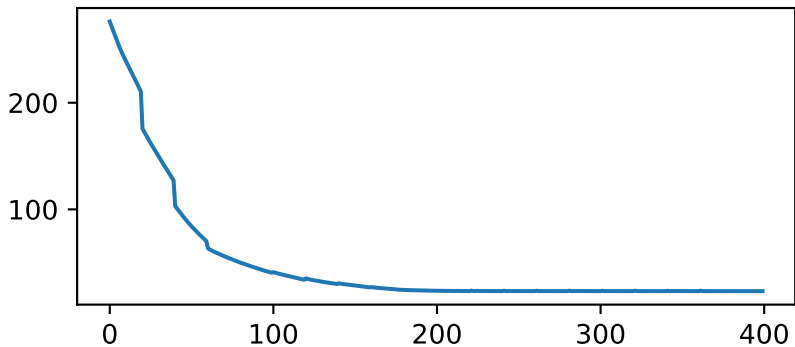

Supplement: supplementary_material [file attachment]

Loss for weight

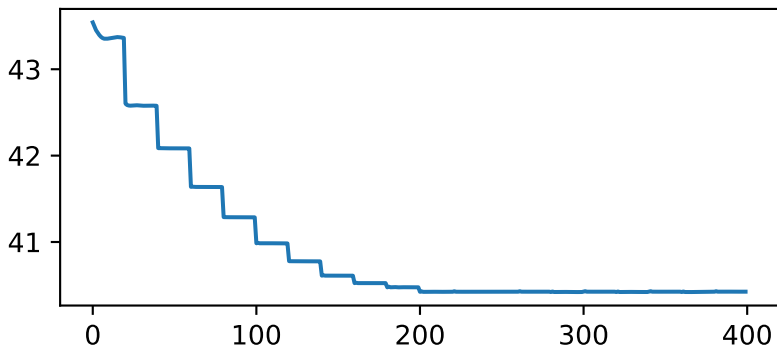

Loss for maps

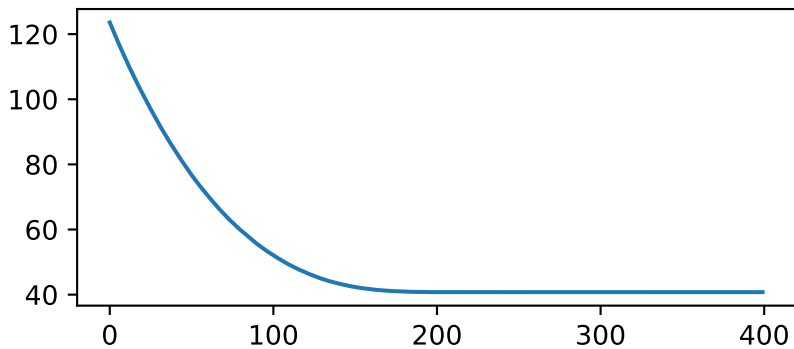

Supplement: supplementary_material [file attachment]

Final: -2.3305

Test II per decision

-2.4

-2.5

0

10

Iteration (outer loop)

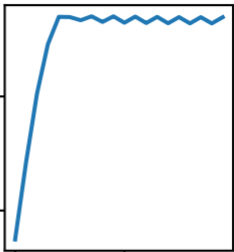

Supplement: supplementary_material [file attachment]

Loss for weight

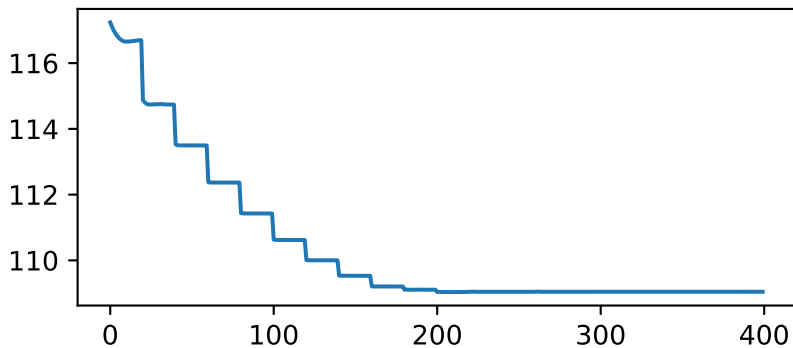

Loss for maps

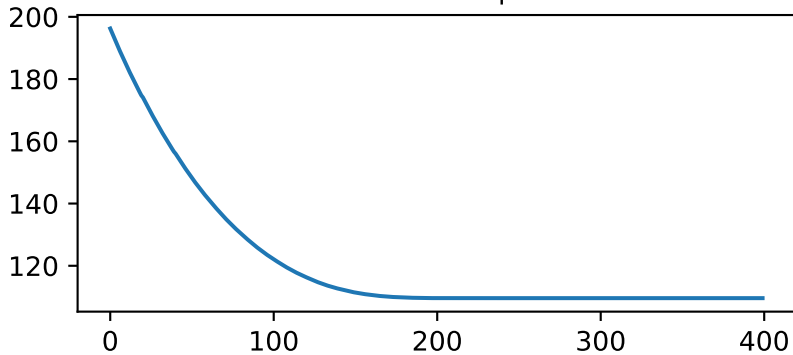

Supplement: supplementary_material [file attachment]

Final: -0.8264

Test II per decision

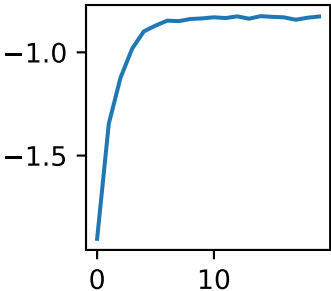

Iteration (outer loop)

Supplement: supplementary_material [file attachment]

Final: -1.5004

Test II per decision

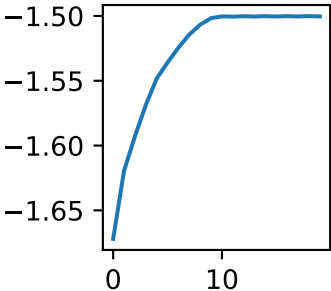

Iteration (outer loop)

Supplement: supplementary_material [file attachment]

Final: -1.0777

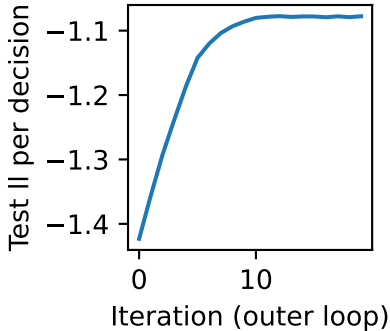

Supplement: supplementary_material [file attachment]

Loss for weight

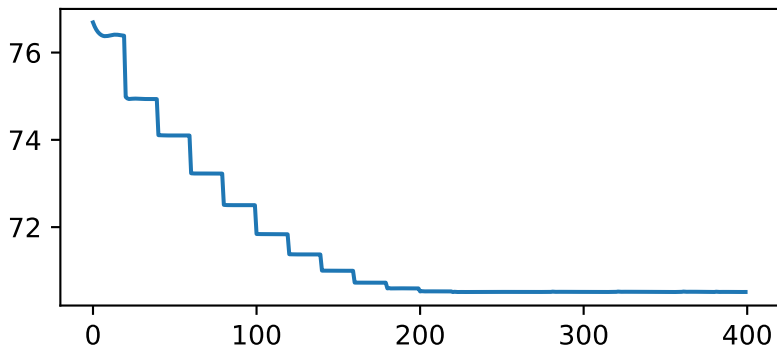

Loss for maps

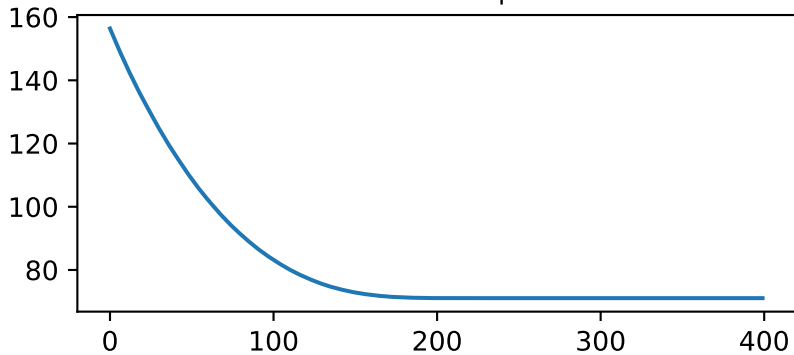

Supplement: supplementary_material [file attachment]

Loss for weight

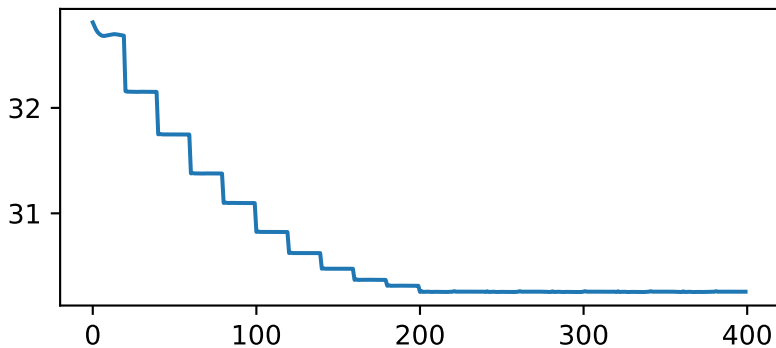

Loss for maps

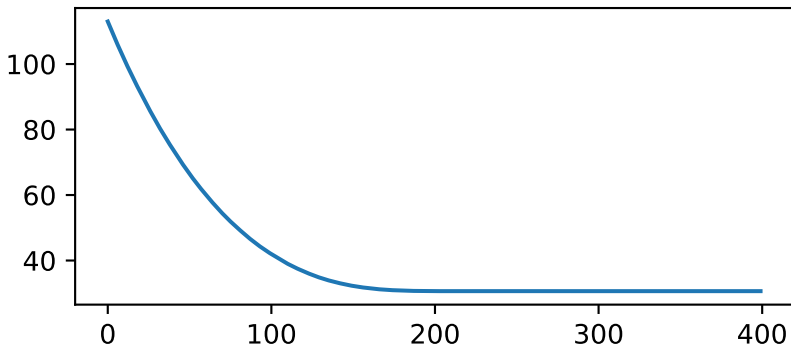

Supplement: supplementary_material [file attachment]

Final: -2.1674

Test II per decision

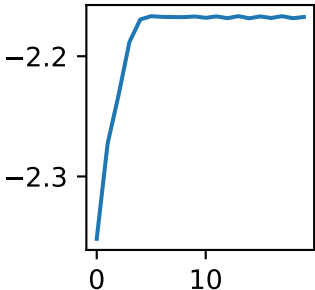

Iteration (outer loop)

Supplement: supplementary_material [file attachment]

Final: -1.8444

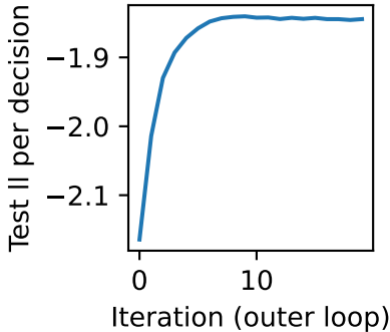

Supplement: supplementary_material [file attachment]

Loss for weight

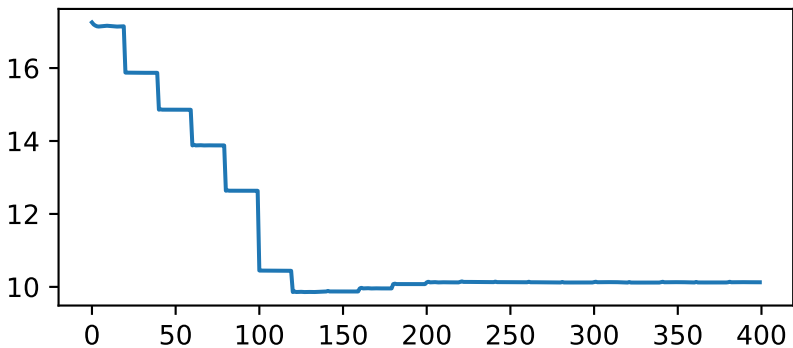

Loss for maps

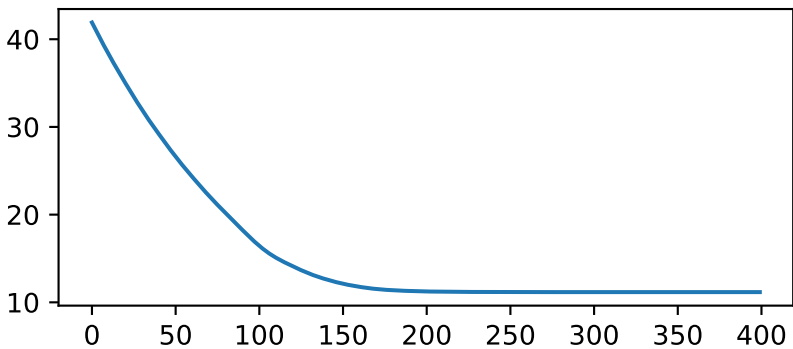

Supplement: supplementary_material [file attachment]

Loss for weight

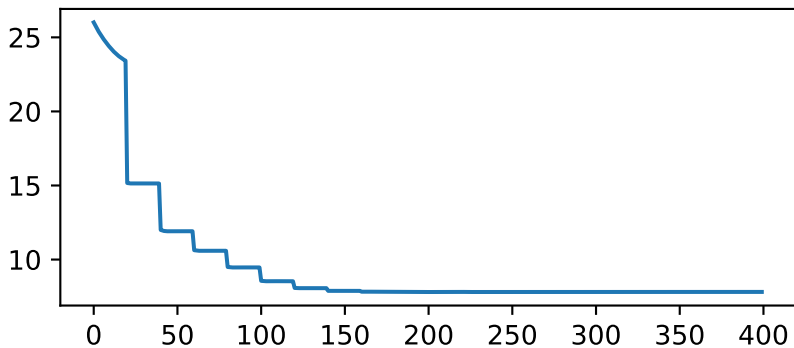

Loss for maps

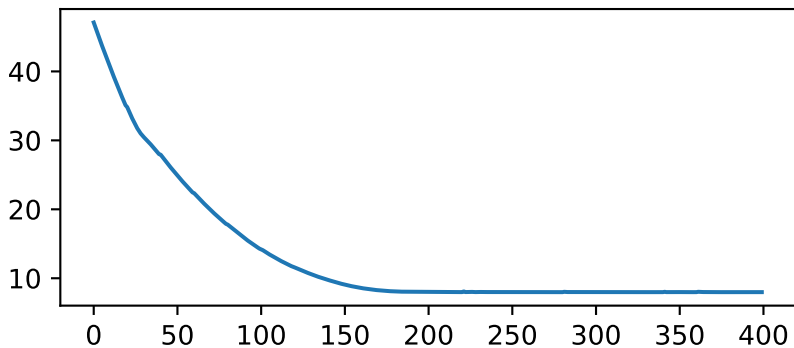

Supplement: supplementary_material [file attachment]

Loss for weight

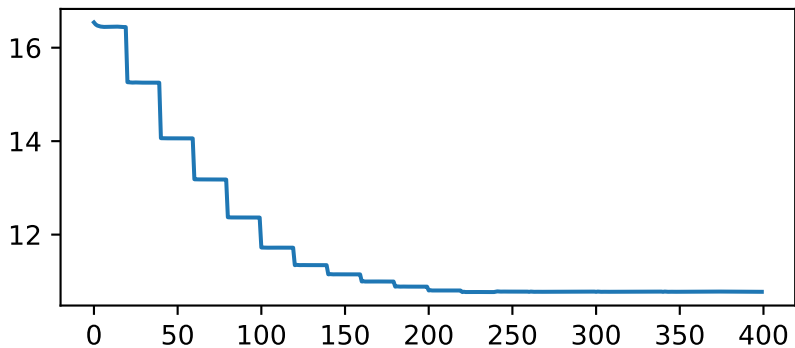

Loss for maps

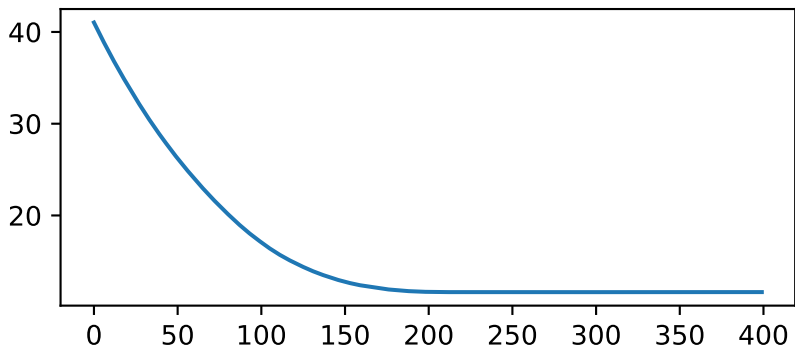

Supplement: supplementary_material [file attachment]

Final: -1.5327

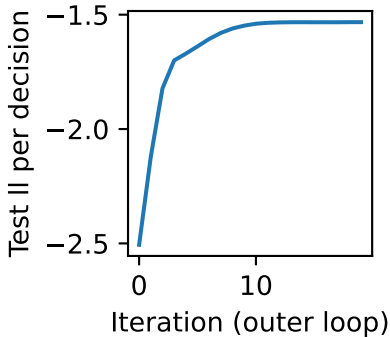

Supplement: supplementary_material [file attachment]

Loss for weight

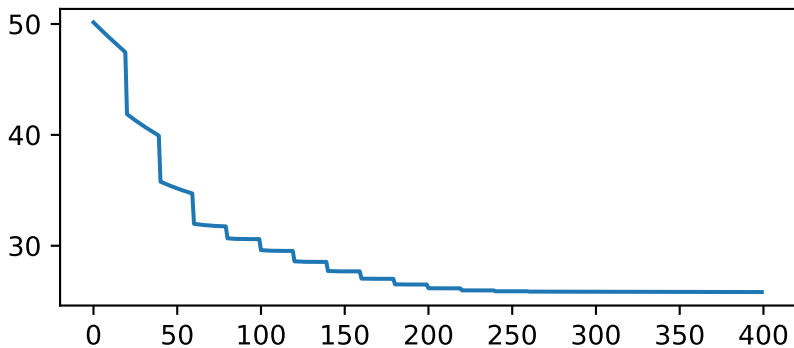

Loss for maps

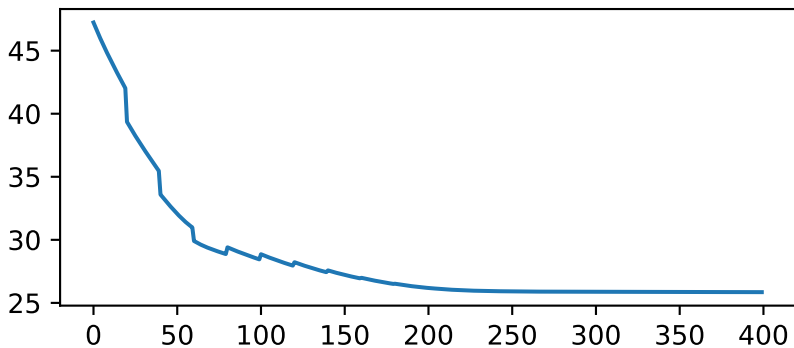

Supplement: supplementary_material [file attachment]

Final ll: -2.70

Test ll per decision

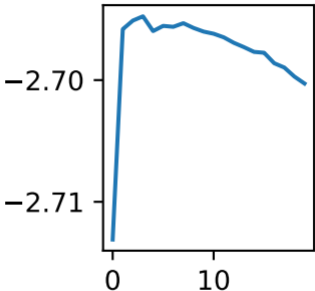

Iteration (outer loop)

Supplement: supplementary_material [file attachment]

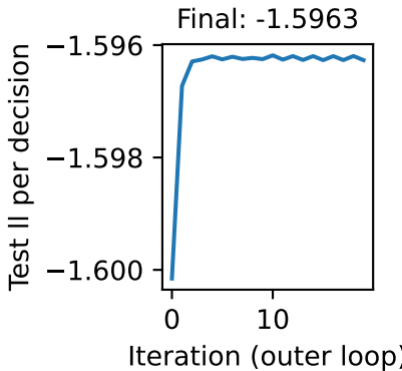

Supplement: supplementary_material [file attachment]

Final II: -0.01

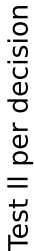

-0.00655

**-0.00660**

-0.00665

0

10

### Iteration (outer loop)

Supplement: supplementary_material [file attachment]

Final: -1.3064

Test II per decision

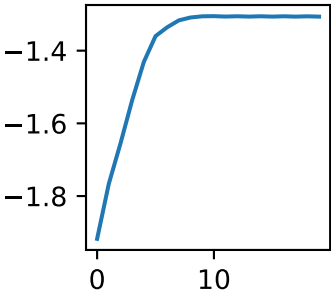

Iteration (outer loop)

Supplement: supplementary_material [file attachment]

Loss for weight

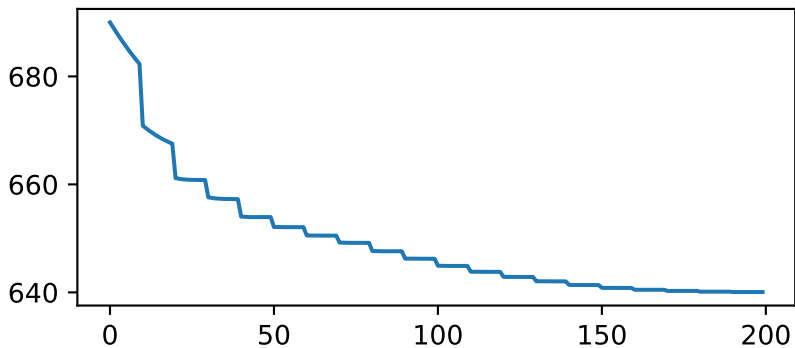

Loss for maps

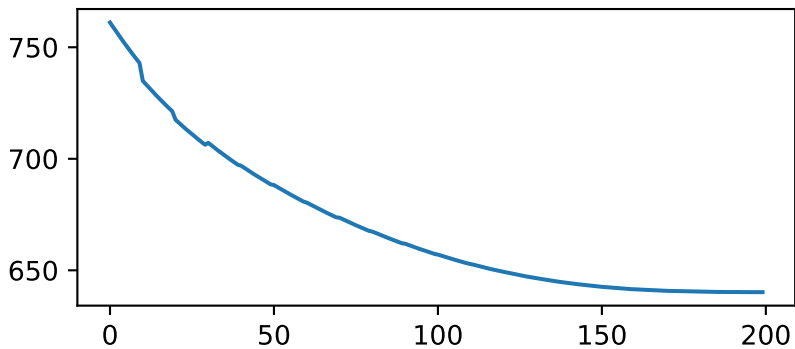

Supplement: supplementary_material [file attachment]

Final: -1.3220

Test II per decision

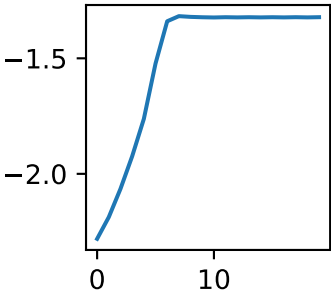

Iteration (outer loop)

Supplement: supplementary_material [file attachment]

Loss for weight

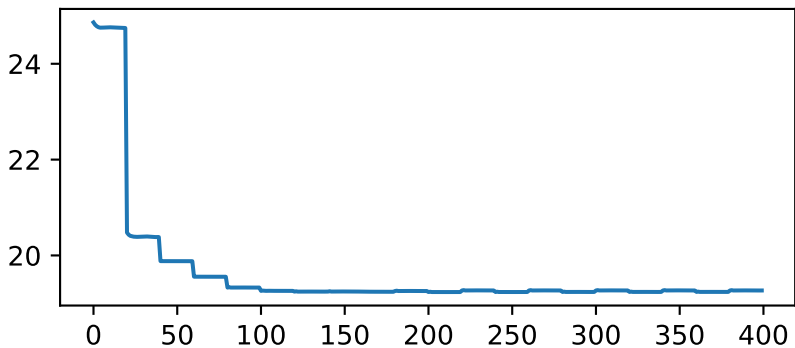

Loss for maps

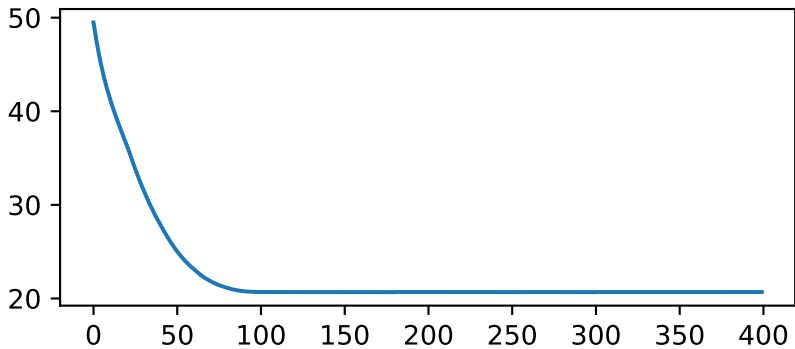

Supplement: supplementary_material [file attachment]

Loss for weight

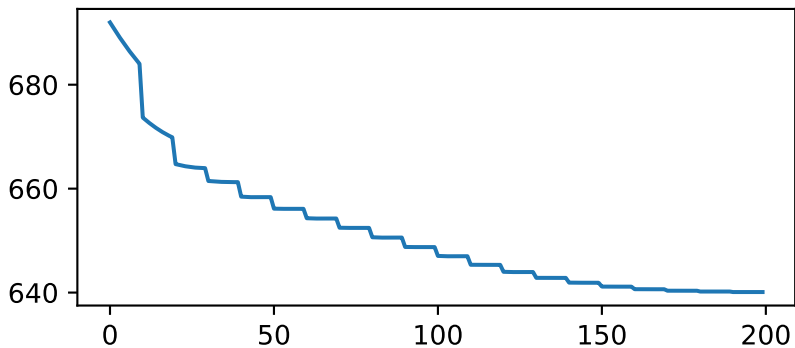

Loss for maps

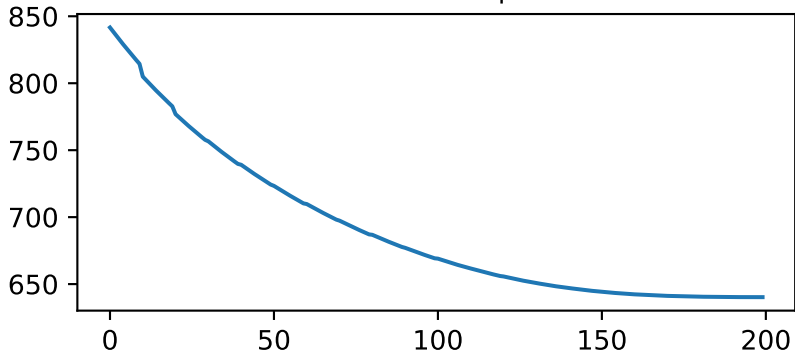

Supplement: supplementary_material [file attachment]

Loss for weight

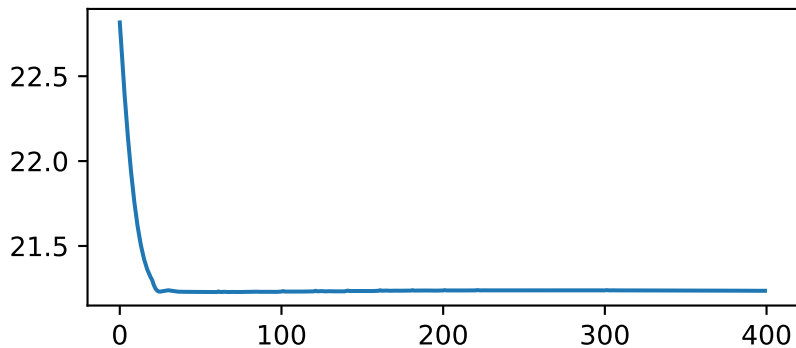

Loss for maps

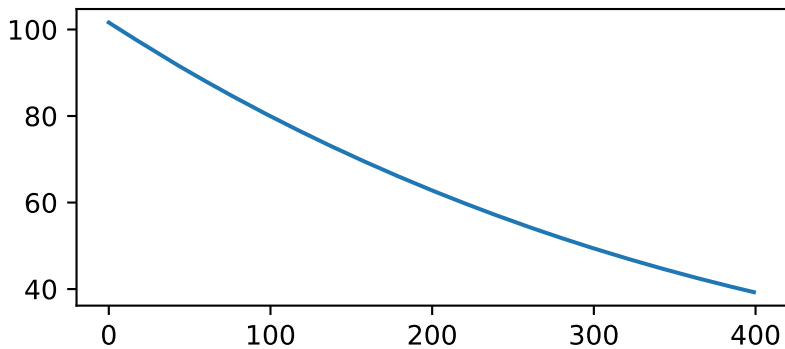

Supplement: supplementary_material [file attachment]

Loss for weight

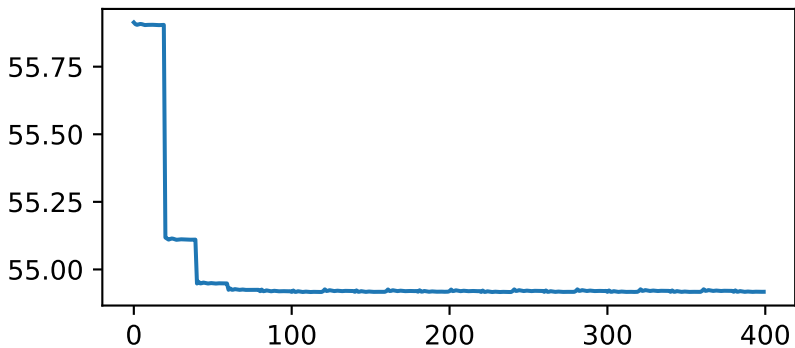

Loss for maps

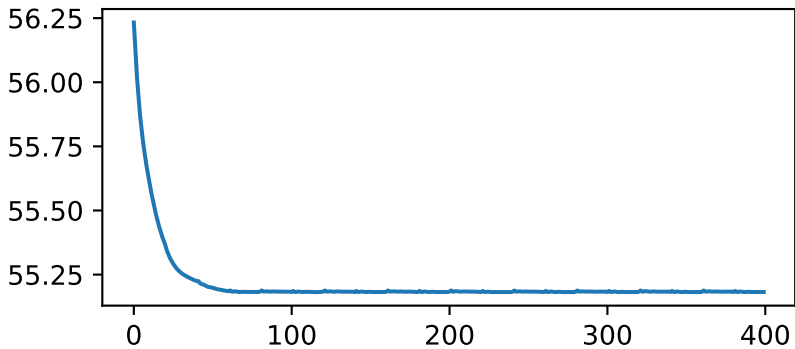

Supplement: supplementary_material [file attachment]

Loss for weight

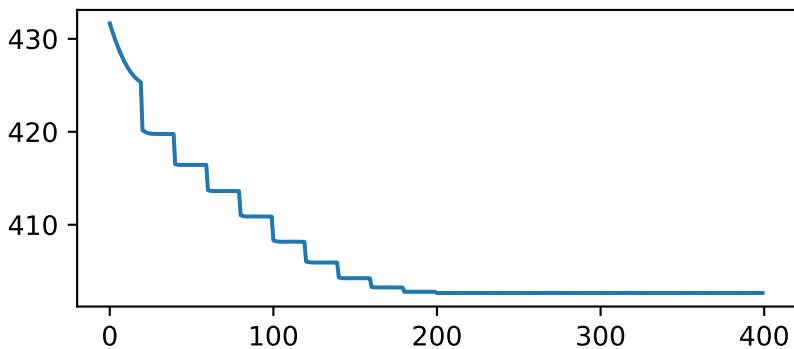

Loss for maps

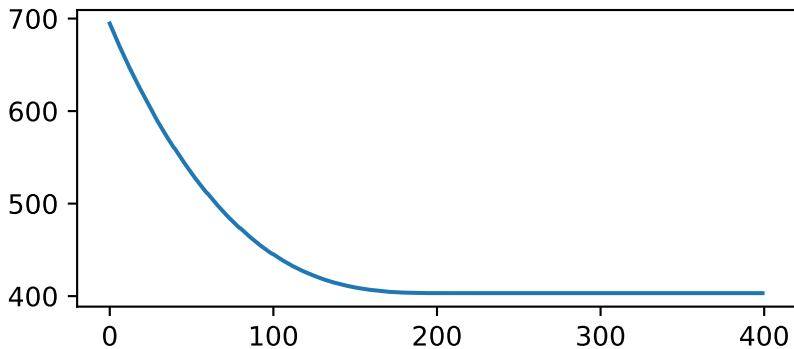

Supplement: supplementary_material [file attachment]

Final: -2.1016

Test II per decision

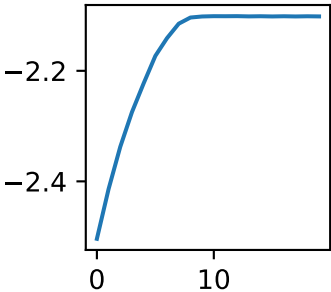

Iteration (outer loop)

Supplement: supplementary_material [file attachment]

Loss for weight

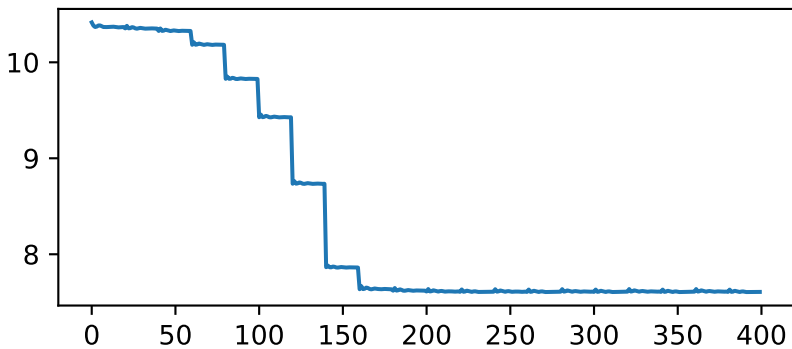

Loss for maps

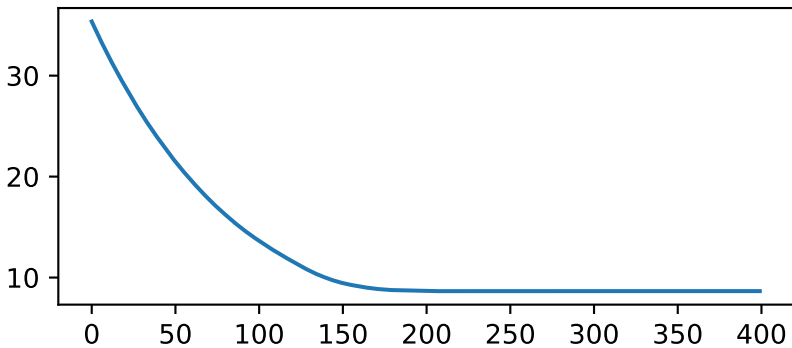

Supplement: supplementary_material [file attachment]

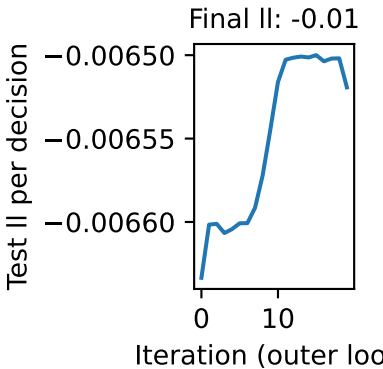

Supplement: supplementary_material [file attachment]

Final: -2.1136

Test II per decision

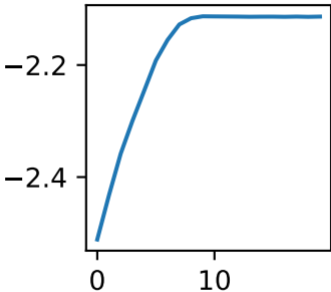

Iteration (outer loop)

Supplement: supplementary_material [file attachment]

Final: -2.4800

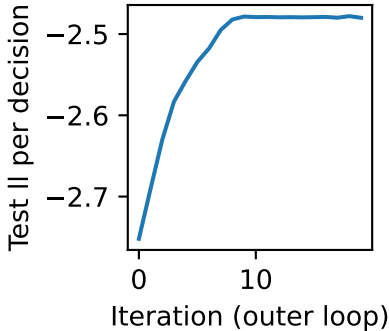

Supplement: supplementary_material [file attachment]

Final: -3.1154

Test II per decision

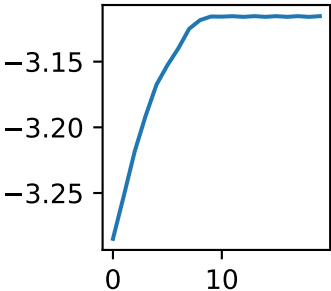

Iteration (outer loop)

Supplement: supplementary_material [file attachment]

Final: -1.5995

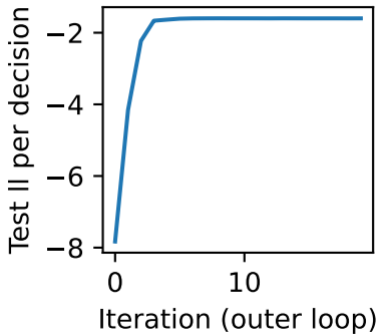

Supplement: supplementary_material [file attachment]

Loss for weight

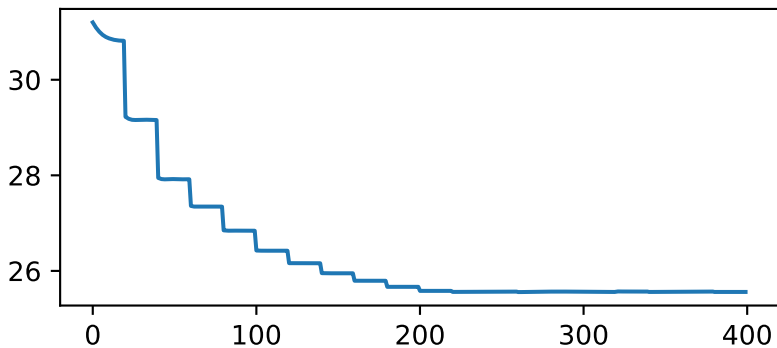

Loss for maps

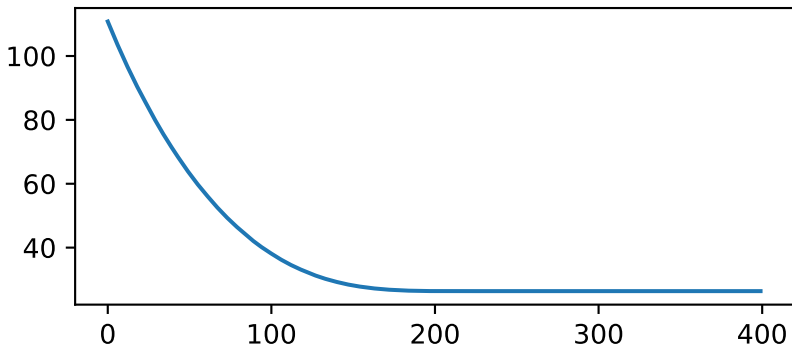

Supplement: supplementary_material [file attachment]

Final: -1.3193

Test II per decision

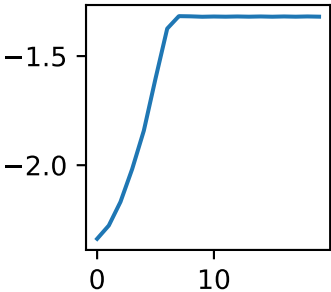

Iteration (outer loop)

Supplement: supplementary_material [file attachment]

Final: -1.5624

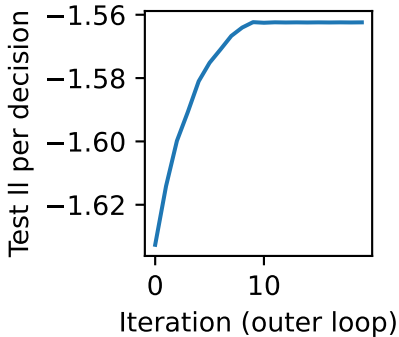

Supplement: supplementary_material [file attachment]

Final: -3.1169

Test II per decision

-3.15  
-3.20  
-3.25

0

10

Iteration (outer loop)

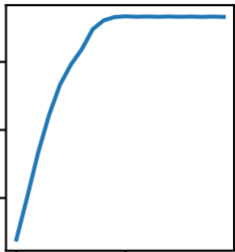

Supplement: supplementary_material [file attachment]
